# Supplementary material for: Nickel-catalyzed defluorinative alkylation of C(sp2)–F bonds
Source: Royal Society of Chemistry journal article supplement (doi:10.1039/d1qo00549a), 2021-01-01

## Supporting Information

### Nickel-Catalyzed Defluorinative Alkylation of C(sp<sup>2</sup>)-F Bonds

Xue Tong<sup>a</sup>, Si-Si Luo<sup>a</sup>, Hua Shen<sup>a</sup>, Tian Cao<sup>a</sup>, Shu Zhang<sup>a</sup>, Yi-Peng Luo<sup>a</sup>, Long-Ling Huang<sup>a</sup>, Xi-Tao Ma<sup>\*b</sup>  
and Xiang-Wei Liu<sup>\*a</sup>

<sup>a</sup> Sichuan Engineering Research Center for Biomimetic Synthesis of Natural Drugs, School of Life Science and Engineering, Southwest Jiaotong University, Chengdu 610031, China. E-mail: [beyondlxw@hotmail.com](mailto:beyondlxw@hotmail.com); <sup>b</sup> Hospital of Chengdu University of Traditional Chinese Medicine, Chengdu 610072, China. E-mail: [doctormxt@126.com](mailto:doctormxt@126.com).

## Table of Contents

|                                                                                   |     |
|-----------------------------------------------------------------------------------|-----|
| General information.....                                                          | S2  |
| Optimization studies .....                                                        | S3  |
| General Procedure for Nickel catalyzed C–F alkylation with Trialkyl aluminum..... | S5  |
| Characterization Data.....                                                        | S5  |
| References.....                                                                   | S17 |
| <sup>1</sup> H and <sup>13</sup> C NMR spectra .....                              | S19 |

## General Information

All manipulations of oxygen- and moisture-sensitive materials were conducted with a standard Schlenk technique under a nitrogen atmosphere or in a glovebox under a nitrogen atmosphere. Analytical thin layer chromatography (TLC) was performed on Merck TLC silica gel 60 F<sub>254</sub> (0.25 mm) plates. Visualization was accomplished with UV light (254 nm) and/or an aqueous alkaline KMnO<sub>4</sub> solution followed by heating using hot air gun.

Proton, carbon and fluorine nuclear magnetic resonance spectra (<sup>1</sup>H, <sup>13</sup>C, and <sup>19</sup>F NMR) were recorded on a Bruker-400M Advance III (<sup>1</sup>H NMR, 400 MHz; <sup>13</sup>C NMR, 101 MHz; <sup>19</sup>F NMR, 376 MHz) spectrometer with solvent resonance as the internal standard (<sup>1</sup>H NMR, CDCl<sub>3</sub> at 7.26 ppm; <sup>13</sup>C NMR, 77.0 ppm). NMR data are reported as follows: chemical shift, multiplicity (s = singlet, d = doublet, t = triplet, q = quartet, sept = septet, m = multiplet), coupling constants (Hz), and integration. GC-MS data was obtained using electron ionization (Agilent 7890B-5977A). GC data was performed on a Nexis GC 2030. High resolution mass spectra were obtained with Waters Xevo G2-Xs QToF (ESI or APCI).

All the commercially available materials were used without further purification. Ni(COD)<sub>2</sub> was purchased from Laajoo Chemicals. 1,2-Bis(diphenylphosphino)-benzene (DPPBz), trialkylaluminum reagents and other anhydrous solvents (1,4-dioxane, THF, DMF and DCE) were purchased from Beijing Inno-chem Science & Technology Company Ltd. Anhydrous toluene was distilled from sodium benzophenone ketyl.

Aryl fluorides were purchased from Beijing Inno-chem Science & Technology Company Ltd. and used as received or were prepared by following the literature procedures. All vinyl monofluorides and vinyl *gem*-difluorides were synthesized according to the literature precedents.<sup>[1-2]</sup>

Flash chromatography was performed with Haiyang Chem silica gel 60 (300-400 mesh). Thin layer chromatography was carried out using CCIS TLC Silica gel 60 F254.

## Optimization studies

Table S1. Optimization of ligands and nickel catalysts.<sup>a</sup>

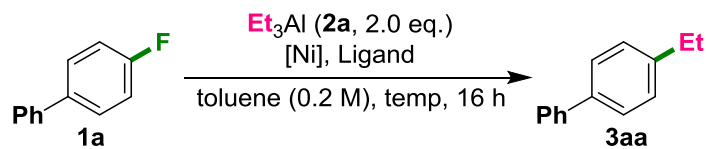

| Entry | [Ni]                  | Ligand               | temp (°C) <sup>b</sup> | Yield (%) of <b>3aa</b> <sup>c</sup> |
|-------|-----------------------|----------------------|------------------------|--------------------------------------|
| 1     | Ni(COD) <sub>2</sub>  | dppm                 | 100                    | 0                                    |
| 2     | Ni(COD) <sub>2</sub>  | dppe                 | 100                    | 49                                   |
| 3     | Ni(COD) <sub>2</sub>  | dpppr                | 100                    | 84                                   |
| 4     | Ni(COD) <sub>2</sub>  | dppent               | 100                    | 36                                   |
| 5     | Ni(COD) <sub>2</sub>  | dppf                 | 100                    | 69                                   |
| 6     | Ni(COD) <sub>2</sub>  | PPh <sub>3</sub>     | 100                    | 17                                   |
| 7     | Ni(COD) <sub>2</sub>  | dppbz                | 100                    | 88(86) <sup>d</sup>                  |
| 8     | Ni(COD) <sub>2</sub>  | <i>rac</i> -BINAP    | 100                    | 75                                   |
| 9     | Ni(COD) <sub>2</sub>  | <sup>t</sup> BuXphos | 100                    | 5                                    |
| 10    | Ni(COD) <sub>2</sub>  | dcype                | 100                    | 86                                   |
| 11    | Ni(COD) <sub>2</sub>  | PCy <sub>3</sub>     | 100                    | 27                                   |
| 12    | NiCl <sub>2</sub>     | dppbz                | 100                    | 0                                    |
| 13    | Ni(acac) <sub>2</sub> | dppbz                | 100                    | 0                                    |

<sup>a</sup> Reaction conditions: **1a** (0.1 mmol), **2a** (0.2 mmol), Ni(COD)<sub>2</sub> (10 mol%), dppbz (10 mol%), toluene (0.5 mL; 0.2 M) at 100 °C for 16 h, under N<sub>2</sub>.

<sup>b</sup> Corrected temperature. <sup>c</sup> GC yields using decane as an internal standard. <sup>d</sup> Isolated yield.

**Table S2. Optimization of solvents and additives.<sup>a</sup>**

| Entry | Solvent     | Additive (2.0 eq.)              | temp (°C) <sup>b</sup> | Yield (%) of <b>3aa</b> <sup>c</sup> |
|-------|-------------|---------------------------------|------------------------|--------------------------------------|
| 1     | toluene     | -                               | 100                    | 88(86) <sup>d</sup>                  |
| 2     | 1,4-dioxane | -                               | 100                    | 8                                    |
| 3     | DMF         | -                               | 100                    | 3                                    |
| 4     | THF         | -                               | 100                    | 3                                    |
| 5     | DCE         | -                               | 100                    | 0                                    |
| 6     | toluene     | CsF                             | 100                    | 23                                   |
| 7     | toluene     | KF                              | 100                    | 26                                   |
| 8     | toluene     | <sup>t</sup> BuOK               | 100                    | 52                                   |
| 9     | toluene     | Cs <sub>2</sub> CO <sub>3</sub> | 100                    | 0                                    |

<sup>a</sup> Reaction conditions: **1a** (0.1 mmol), **2a** (0.2 mmol), Ni(COD)<sub>2</sub> (10 mol%), dppbz (10 mol%), toluene (0.5 mL; 0.2 M) at 100 °C for 16 h, under N<sub>2</sub>. <sup>b</sup> Corrected temperature. <sup>c</sup> GC yields using decane as an internal standard. DMF = *N,N*-Dimethylformamide; THF = Tetrahydrofuran; DCE = 1,2-Dichloroethane. <sup>d</sup> Isolated yield.

**Table S3. Optimization of stoichiometry of reactants **2a** and reaction time.<sup>a</sup>**

| Entry          | X   | temp (°C) <sup>b</sup> | Yield (%) of <b>3aa</b> <sup>c</sup> |
|----------------|-----|------------------------|--------------------------------------|
| 1              | 2.0 | 100                    | 88(86) <sup>d</sup>                  |
| 2              | 1.5 | 100                    | 76                                   |
| 3              | 1.0 | 100                    | 46                                   |
| 4              | 0.5 | 100                    | 32                                   |
| 5 <sup>e</sup> | 2.0 | 100                    | 67                                   |
| 6 <sup>f</sup> | 2.0 | 100                    | 62                                   |

<sup>a</sup> Reaction conditions: **1a** (0.1 mmol), **2a** (0.2 mmol), Ni(COD)<sub>2</sub> (10 mol%), dppbz (10 mol%), toluene (0.5 mL; 0.2 M) at 100 °C for 16 h, under Ar. <sup>b</sup> Corrected temperature. <sup>c</sup> GC yields using decane as an internal standard. <sup>d</sup> Isolated yield. <sup>e</sup> The reaction time is 12 h. <sup>f</sup> The reaction time is 6 h.

**Table S4. Optimization of reaction concentration and temperature.<sup>a</sup>**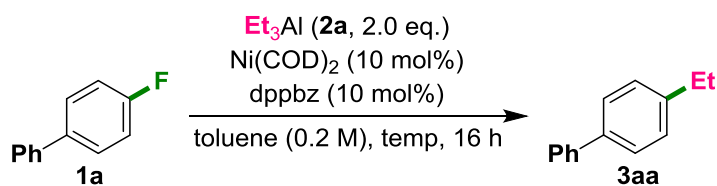

| Entry          | temp (°C) <sup>b</sup> | Yield (%) of <b>3aa</b> <sup>c</sup> |
|----------------|------------------------|--------------------------------------|
| 1              | 100                    | 88(86) <sup>d</sup>                  |
| 2 <sup>e</sup> | 100                    | 79                                   |
| 3 <sup>f</sup> | 100                    | 64                                   |
| 4              | 90                     | 78                                   |
| 5              | 110                    | 72                                   |

<sup>a</sup> Reaction conditions: **1a** (0.1 mmol), **2a** (0.2 mmol),  $\text{Ni}(\text{COD})_2$  (10 mol%), dppbz (10 mol%), toluene (0.5 mL; 0.2 M) at 100 °C for 16 h, under  $\text{N}_2$ . <sup>b</sup> Corrected temperature. <sup>c</sup> GC yields using decane as an internal standard. <sup>d</sup> Isolated yield. <sup>e</sup> 0.25 mL of toluene was used. <sup>f</sup> 1.0 mL of toluene was used.

### General Procedure for Nickel catalyzed C-F alkylation with Trialkyl aluminum

An oven dried Schlenk tube containing a stirring bar was charged with aryl fluoride **1** (0.20 mmol, 1.0 eq.). The tube was introduced in nitrogen-filled glovebox and  $\text{Ni}(\text{COD})_2$  (5.4 mg, 10 mol %), dppbz (8.9 mg, 10 mol %), Toluene (1.0 mL) and Triethylaluminum or Trimethylaluminum **2a** (0.1 mL, 0.40 mmol, 2.0 eq.) were then added. The tube with the mixture was taken out of the glovebox and stirred at 100 °C for 16 h. The mixture was then allowed to warm to room temperature, the mixture was diluted with EtOAc (3 mL), concentrated under reduced pressure and purified by column chromatography on silica gel to afford the corresponding final product **3aa**.

### Characterization Data

#### 4-Ethyl-1,1'-biphenyl

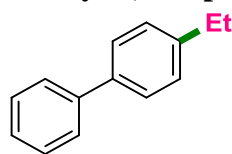**3aa**

Isolated yield: 91%

Colorless viscous liquid. This compound is known in the literature.<sup>[3]</sup> <sup>1</sup>H NMR (400

MHz, CDCl<sub>3</sub>) δ 7.58 (d, *J* = 7.9 Hz, 2H), 7.52 (d, *J* = 8.2 Hz, 2H), 7.43 (t, *J* = 7.6 Hz, 2H), 7.35 – 7.25 (m, 3H), 2.70 (q, *J* = 7.6 Hz, 2H), 1.28 (t, *J* = 7.6 Hz, 3H). <sup>13</sup>C NMR (101 MHz, CDCl<sub>3</sub>) δ 143.45, 141.26, 138.68, 128.78, 128.37, 127.16, 127.09, 127.04, 28.61, 15.69.

#### 4,4'-Diethylbiphenyl

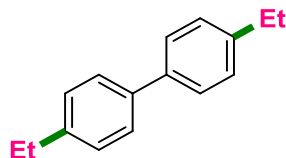

3ba

Isolated yield: 89%

Colorless viscous liquid. This compound is known in the literature.<sup>[4]</sup> <sup>1</sup>H NMR (400 MHz, CDCl<sub>3</sub>) δ 7.53 (d, *J* = 8.2 Hz, 4H), 7.28 (d, *J* = 8.1 Hz, 4H), 2.71 (q, *J* = 7.6 Hz, 4H), 1.30 (t, *J* = 7.7 Hz, 6H). <sup>13</sup>C NMR (101 MHz, CDCl<sub>3</sub>) δ 143.08, 138.61, 128.25, 126.95, 28.53, 15.60.

#### 4-Ethyl-4'-methoxy-1,1'-biphenyl

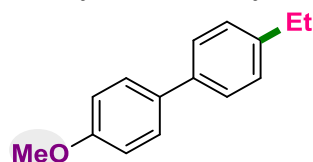

3ca

Isolated yield: 88%

Colorless viscous liquid. This compound is known in the literature.<sup>[5]</sup> <sup>1</sup>H NMR (400 MHz, CDCl<sub>3</sub>) δ 7.55 – 7.45 (m, 4H), 7.29 – 7.22 (m, 2H) 6.97 (d, *J* = 8.7 Hz, 2H), 3.85 (s, 3H), 2.69 (q, *J* = 7.6 Hz, 2H), 1.28 (t, *J* = 7.6 Hz, 3H). <sup>13</sup>C NMR (101 MHz, CDCl<sub>3</sub>) δ 158.95, 142.77, 138.25, 133.80, 128.28, 128.02, 126.69, 114.18, 55.35, 28.52, 15.67.

#### 4'-ethyl-2-methoxy-1,1'-biphenyl

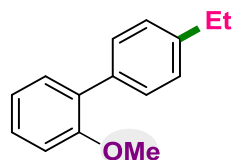

3da

Isolated yield: 84%

Colorless viscous liquid. <sup>1</sup>H NMR (400 MHz, CDCl<sub>3</sub>) δ 7.45 (d, *J* = 8.1 Hz, 2H), 7.35 – 7.24 (m, 2H), 7.24 (d, *J* = 8.1 Hz, 2H), 7.05 – 6.93 (m, 2H), 3.79 (s, 3H), 2.68 (q, *J* = 7.6 Hz, 2H), 1.27 (t, *J* = 7.6 Hz, 3H). <sup>13</sup>C NMR (101 MHz, CDCl<sub>3</sub>) δ 156.53, 142.91, 135.85, 130.88, 129.50, 128.40, 127.58, 120.84, 111.18, 55.56, 28.65, 15.55.

HRMS Calcd for C<sub>15</sub>H<sub>17</sub>O<sup>+</sup> [M+H]<sup>+</sup> 213.1274, found 213.1275.

### 1-Ethynaphthalene

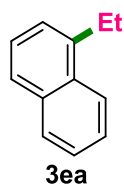

Isolated yield: 83%

Colorless Liquid. This compound is known in the literature.<sup>[6]</sup> **<sup>1</sup>H NMR** (400 MHz, CDCl<sub>3</sub>) δ 8.06 (d, *J* = 7.7 Hz, 1H), 7.85 (d, *J* = 7.8 Hz, 1H), 7.70 (d, *J* = 8.1 Hz, 1H), 7.55 – 7.38 (m, 3H), 7.34 (d, *J* = 7.0 Hz, 1H), 3.12 (q, *J* = 7.5 Hz, 2H), 1.38 (t, *J* = 7.5 Hz, 3H). **<sup>13</sup>C NMR** (101 MHz, CDCl<sub>3</sub>) δ 140.28, 133.81, 131.77, 128.75, 126.39, 125.68, 125.39, 124.85, 123.74, 25.92, 15.07.

### 2-Ethynaphthalene

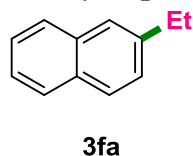

Isolated yield: 78%

Colorless liquid. This compound is known in the literature.<sup>[7]</sup> **<sup>1</sup>H NMR** (400 MHz, CDCl<sub>3</sub>) δ 7.83 – 7.73 (m, 3H), 7.61 (s, 1H), 7.46 – 7.31 (m, 3H), 2.80 (q, *J* = 7.6 Hz, 2H), 1.32 (t, *J* = 7.6 Hz, 3H). **<sup>13</sup>C NMR** (101 MHz, CDCl<sub>3</sub>) δ 141.77, 133.69, 131.92, 127.79, 127.60, 127.41, 127.09, 125.83, 125.53, 125.01, 29.06, 15.55.

### 2-Ethyl-6-methoxynaphthalene

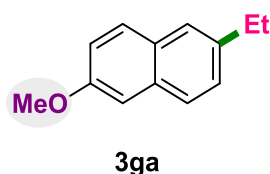

Isolated yield: 75%

Colorless liquid. This compound is known in the literature.<sup>[8]</sup> **<sup>1</sup>H NMR** (400 MHz, CDCl<sub>3</sub>) 7.70 – 7.64 (m, 2H), 7.55 (s, 1H), 7.31 (d, *J* = 10.0 Hz, 1H), 7.11 (d, *J* = 7.5 Hz, 2H), 3.90 (s, 3H), 2.78 (q, *J* = 7.6 Hz, 2H), 1.31 (t, *J* = 7.6 Hz, 3H). **<sup>13</sup>C NMR** (101 MHz, CDCl<sub>3</sub>) δ 157.06, 139.45, 132.88, 129.16, 128.90, 127.55, 126.68, 125.42, 118.59, 105.65, 55.29, 28.84, 15.64.

### 1-ethyl-4-methoxybenzene

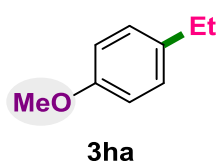

GC yield: 56%

Colorless liquid. This compound is known in the literature.<sup>[9]</sup>  $^1\text{H NMR}$  (400 MHz,  $\text{CDCl}_3$ ) 7.11 (d,  $J = 8.5$  Hz, 2H), 6.83 (d,  $J = 8.5$  Hz, 2H), 3.78 (s, 3H), 2.59 (q,  $J = 7.6$  Hz, 2H), 1.21 (t,  $J = 7.6$  Hz, 3H).

### 1-(4-Ethylphenyl)-1H-pyrrole

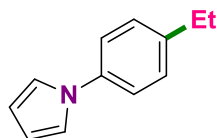

3ia

Isolated yield: 62%

Yellow viscous liquid. This compound is known in the literature.<sup>[10]</sup>  $^1\text{H NMR}$  (400 MHz,  $\text{CDCl}_3$ )  $\delta$  7.31 (d,  $J = 8.5$  Hz, 2H), 7.24 (d,  $J = 8.6$  Hz, 2H), 7.06 (t,  $J = 2.1$  Hz, 2H), 6.33 (t,  $J = 2.1$  Hz, 2H), 2.67 (q,  $J = 7.6$  Hz, 2H), 1.26 (t,  $J = 7.6$  Hz, 3H).  $^{13}\text{C NMR}$  (101 MHz,  $\text{CDCl}_3$ )  $\delta$  141.78, 138.66, 128.86, 120.65, 119.43, 110.04, 28.28, 15.63.

### (E)-1-ethyl-4-styrylbenzene

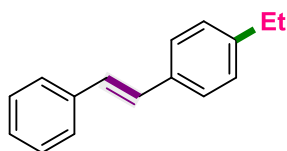

3ja

Isolated yield: 85%

Colorless viscous liquid. This compound is known in the literature.<sup>[11]</sup>  $^1\text{H NMR}$  (400 MHz,  $\text{CDCl}_3$ )  $\delta$  7.43 (d,  $J = 7.5$  Hz, 2H), 7.37 (d,  $J = 8.1$  Hz, 2H), 7.27 (t,  $J = 7.6$  Hz, 2H), 7.19 – 7.10 (m, 3H), 7.01 (d,  $J = 3.2$  Hz, 2H), 2.58 (q,  $J = 7.6$  Hz, 2H), 1.17 (t,  $J = 7.6$  Hz, 3H).  $^{13}\text{C NMR}$  (101 MHz,  $\text{CDCl}_3$ )  $\delta$  143.96, 137.58, 134.85, 128.67, 128.23, 127.81, 127.42, 126.54, 126.43, 28.67, 15.54.

### (8R,9S,13S,14S)-3-(4-ethylphenyl)-17-methoxy-13-methyl-7,8,9,11,12,13,14,15,16,17-decahydro-6H-cyclopenta[a]phenanthrene

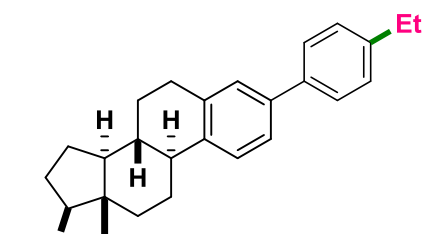

3ka

Isolated yield: 89%

Colorless viscous liquid.  $^1\text{H NMR}$  (400 MHz,  $\text{CDCl}_3$ )  $\delta$  7.49 (d,  $J = 8.2$  Hz, 2H), 7.35 (s, 2H), 7.29 (s, 1H), 7.26 – 7.21 (m, 2H), 3.38 (s, 3H), 3.31 (t,  $J = 8.3$  Hz, 1H), 2.97 – 2.89 (m, 2H), 2.68 (q,  $J = 7.6$  Hz, 2H), 2.39 – 2.21 (m, 2H), 2.14 – 2.00 (m, 2H), 1.96 – 1.86 (m, 1H), 1.76 – 1.31 (m, 8H), 1.27 (t,  $J = 7.6$  Hz, 3H), 0.80 (s, 3H).  $^{13}\text{C NMR}$



(101 MHz, CDCl<sub>3</sub>)  $\delta$  143.07, 139.28, 138.55, 136.62, 128.68, 128.20, 127.59, 127.04, 126.53, 125.80, 124.31, 90.82, 57.94, 51.50, 44.36, 43.26, 38.46, 37.65, 29.72, 28.53, 27.79, 27.27, 26.30, 23.09, 15.60, 11.58. **HRMS** Calcd for C<sub>27</sub>H<sub>35</sub>O<sup>+</sup> [M+H]<sup>+</sup> 375.2682, found 375.2688.

#### 4-(4-ethylphenyl)pyridine

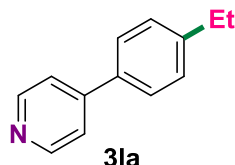

Isolated yield: 80%

Colorless liquid. This compound is known in the literature.<sup>[12]</sup> **<sup>1</sup>H NMR** (400 MHz, CDCl<sub>3</sub>)  $\delta$  8.64 (d,  $J$  = 5.2 Hz, 2H), 7.62 – 7.54 (m, 2H), 7.54 – 7.47 (m, 2H), 7.32 (d,  $J$  = 8.0 Hz, 2H), 2.72 (q,  $J$  = 7.6 Hz, 2H), 1.28 (t,  $J$  = 7.6 Hz, 3H).

#### 3-(4-ethylphenyl)pyridine

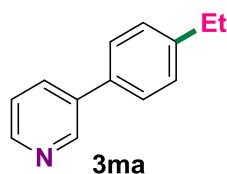

Isolated yield: 76%

Colorless liquid. This compound is known in the literature.<sup>[13]</sup> **<sup>1</sup>H NMR** (400 MHz, CDCl<sub>3</sub>)  $\delta$  8.64 (d,  $J$  = 5.2 Hz, 2H), 7.62 – 7.54 (m, 2H), 7.54 – 7.47 (m, 2H), 7.32 (d,  $J$  = 8.0 Hz, 2H), 2.72 (q,  $J$  = 7.6 Hz, 2H), 1.28 (t,  $J$  = 7.6 Hz, 3H).

#### 6-(4-ethylphenyl)quinoline

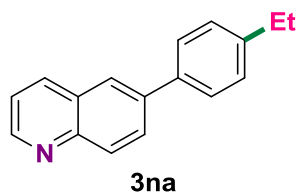

Isolated yield: 89%

Colorless viscous liquid. **<sup>1</sup>H NMR** (400 MHz, CDCl<sub>3</sub>)  $\delta$  8.64 (d,  $J$  = 5.2 Hz, 2H), 7.62 – 7.54 (m, 2H), 7.54 – 7.47 (m, 2H), 7.32 (d,  $J$  = 8.0 Hz, 2H), 2.72 (q,  $J$  = 7.6 Hz,

2H), 1.28 (t,  $J = 7.6$  Hz, 3H).  $^{13}\text{C}$  NMR (101 MHz,  $\text{CDCl}_3$ )  $\delta$  150.19, 147.61, 144.01, 139.30, 137.66, 136.19, 129.82, 129.22, 128.53, 127.38, 125.11, 121.41, 28.57, 15.58. HRMS Calcd for  $\text{C}_{17}\text{H}_{16}\text{N}^+$   $[\text{M}+\text{H}]^+$  234.1277, found 234.1278.

#### 4-Methyl-1,1'-biphenyl

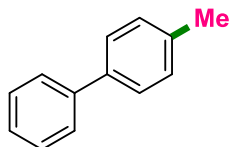

**3ab**

Isolated yield: 89%

Colorless viscous liquid. This compound is known in the literature.<sup>[14]</sup>  $^1\text{H}$  NMR (400 MHz,  $\text{CDCl}_3$ )  $\delta$  7.50 (d,  $J = 7.0$  Hz, 2H), 7.42 (d,  $J = 8.1$  Hz, 2H), 7.34 (t,  $J = 7.7$  Hz, 2H), 7.24 (t,  $J = 7.3$  Hz, 1H), 7.17 (d,  $J = 7.8$  Hz, 2H), 2.32 (s, 3H).  $^{13}\text{C}$  NMR (101 MHz,  $\text{CDCl}_3$ )  $\delta$  140.15, 137.34, 135.99, 128.45, 127.68, 125.97, 125.95, 20.06.

#### 4,4'-Dimethylbiphenyl

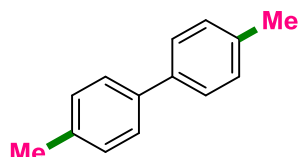

**3bb**

Isolated yield: 86%

Colorless viscous liquid. This compound is known in the literature.<sup>[15]</sup>  $^1\text{H}$  NMR (400 MHz,  $\text{CDCl}_3$ )  $\delta$  6.59 (d,  $J = 8.1$  Hz, 4H), 6.35 (d,  $J = 8.0$  Hz, 4H), 1.50 (s, 6H).  $^{13}\text{C}$  NMR (101 MHz,  $\text{CDCl}_3$ )  $\delta$  138.31, 136.72, 129.45, 126.83, 21.10.

#### 4-Methyl-4'-methoxy-1,1'-biphenyl

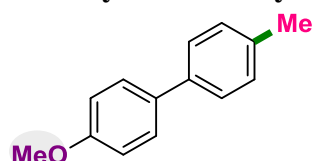

**3cb**

Isolated yield: 72%

Colorless viscous liquid. This compound is known in the literature.<sup>[16]</sup>  $^1\text{H}$  NMR (400 MHz,  $\text{CDCl}_3$ )  $\delta$  7.52 (d,  $J = 8.8$  Hz, 2H), 7.46 (d,  $J = 8.1$  Hz, 2H), 7.23 (d,  $J = 7.8$  Hz, 2H), 6.97 (d,  $J = 8.8$  Hz, 2H), 3.85 (s, 3H), 2.39 (s, 3H).  $^{13}\text{C}$  NMR (101 MHz,  $\text{CDCl}_3$ )  $\delta$  158.95, 137.99, 136.37, 133.77, 129.45, 127.97, 126.60, 114.18, 55.36, 21.06.

#### 1-Methylnaphthalene

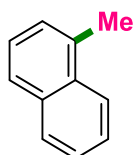

**3eb**

Isolated yield: 81%

Colorless liquid. This compound is known in the literature.<sup>[17]</sup>  $^1\text{H NMR}$  (400 MHz,  $\text{CDCl}_3$ )  $\delta$  8.04 (d,  $J = 9.6$  Hz, 1H), 7.92 – 7.85 (m, 1H), 7.75 (d,  $J = 8.1$  Hz, 1H), 7.60 – 7.49 (m, 2H), 7.45 – 7.34 (m, 2H), 2.74 (s, 3H).  $^{13}\text{C NMR}$  (101 MHz,  $\text{CDCl}_3$ )  $\delta$  134.30, 133.59, 132.66, 128.56, 126.60, 126.41, 125.75, 125.61, 125.58, 124.15, 19.42.

### 2-Methyl-6-methoxynaphthalene

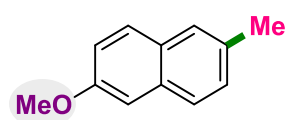

**3gb**

Isolated yield: 84%

Colorless liquid. This compound is known in the literature.<sup>[18]</sup>  $^1\text{H NMR}$  (400 MHz,  $\text{CDCl}_3$ )  $\delta$  7.68 (dd,  $J = 8.9, 3.2$  Hz, 2H), 7.58 (s, 1H), 7.31 (dd,  $J = 8.3, 1.8$  Hz, 1H), 7.19 – 7.12 (m, 2H), 3.94 (s, 3H), 2.51 (s, 3H).  $^{13}\text{C NMR}$  (101 MHz,  $\text{CDCl}_3$ )  $\delta$  157.03, 133.04, 132.67, 129.17, 128.73, 128.60, 126.73, 126.59, 118.64, 105.68, 55.28, 21.47.

### (*E*)-1-methyl-4-styrylbenzene

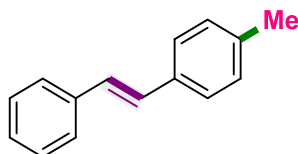

**3jb**

Isolated yield: 91%

Colorless viscous liquid. This compound is known in the literature.<sup>[11]</sup>  $^1\text{H NMR}$  (400 MHz,  $\text{CDCl}_3$ )  $\delta$  7.57 – 7.52 (m, 2H), 7.49 – 7.43 (m, 2H), 7.39 (t,  $J = 7.7$  Hz, 2H), 7.32 – 7.25 (m, 1H), 7.21 (d,  $J = 7.9$  Hz, 2H), 7.12 (d,  $J = 2.5$  Hz, 2H), 2.40 (s, 3H).  $^{13}\text{C NMR}$  (101 MHz,  $\text{CDCl}_3$ )  $\delta$  137.55, 134.58, 129.42, 128.68, 127.73, 127.43, 126.46, 126.42, 21.28.

### (*E*)-4-(But-1-ene-1-yl)-1,1'-biphenyl

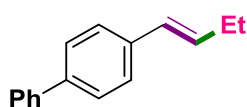

**5aa**

Isolated yield: 78%

Colorless liquid. This compound is known in the literature.<sup>[19]</sup>  $^1\text{H NMR}$  (400 MHz,  $\text{CDCl}_3$ )  $\delta$  7.59 (d,  $J = 7.1$  Hz, 2H), 7.53 (d,  $J = 8.3$  Hz, 2H), 7.42 (t,  $J = 7.9$  Hz, 4H), 7.32 (t,  $J = 7.3$  Hz, 1H), 6.41 (d,  $J = 15.9$  Hz, 1H), 6.31 (dt,  $J = 15.8, 6.2$  Hz, 1H), 2.25 (dq,  $J = 8.6, 7.4$  Hz, 2H), 1.10 (t,  $J = 7.4$  Hz, 3H).  $^{13}\text{C NMR}$  (101 MHz,  $\text{CDCl}_3$ )  $\delta$  140.90, 139.52, 137.04, 132.88, 128.77, 128.37, 127.20, 127.15, 126.91, 126.34, 26.18, 13.71.

**(E)-2-(but-1-en-1-yl)naphthalene**

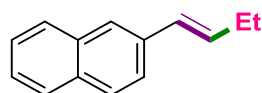

**5ba**

Isolated yield: 88%

Colorless liquid. This compound is known in the literature.<sup>[20]</sup>  $^1\text{H NMR}$  (400 MHz,  $\text{CDCl}_3$ )  $\delta$  7.79 – 7.73 (m, 3H), 7.67 (s, 1H), 7.58 (dd,  $J = 8.5, 1.7$  Hz, 1H), 7.41 (t,  $J = 8.5$  Hz, 2H), 6.54 (d,  $J = 15.9$  Hz, 1H), 6.40 (dt,  $J = 15.8, 6.4$  Hz, 1H), 2.35 – 2.22 (m, 2H), 1.13 (t,  $J = 7.5$  Hz, 3H).  $^{13}\text{C NMR}$  (101 MHz,  $\text{CDCl}_3$ )  $\delta$  135.43, 133.75, 133.16, 132.66, 128.94, 128.05, 127.83, 127.64, 126.11, 125.42, 125.33, 123.60, 26.23, 13.72.

**(Z/E)-1-(but-1-en-1-yl)-4-methoxybenzene**

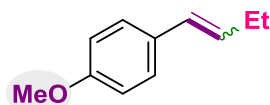

**5ca**

(Z)-/(E)- 1:1

Isolated yield: 60%

Colorless liquid. This compound is known in the literature.<sup>[21]</sup>  $^1\text{H NMR}$  (400 MHz,  $\text{CDCl}_3$ )  $\delta$  7.35 – 7.22 (m, 2H), 6.89 (dd,  $J = 13.9, 8.7$  Hz, 2H), 6.36 (d,  $J = 11.7$  Hz, 1H), 6.16 (dt,  $J = 15.8, 6.5$  Hz, 1H), 5.60 (dt,  $J = 11.6, 7.2$  Hz, 1H), 3.85 (s, 1H), 3.83 (s, 1H), 2.42-2.34 (m,  $J = 7.5, 2.1$  Hz, 1H), 2.31 – 2.19 (m, 1H), 1.11 (q,  $J = 7.5$  Hz, 3H).  $^{13}\text{C NMR}$  (101 MHz,  $\text{CDCl}_3$ )  $\delta$  158.63, 158.18, 133.19, 130.82, 130.52, 130.49, 129.92, 128.15, 127.67, 126.97, 113.92, 113.56, 55.25, 26.04, 21.97, 14.54, 13.81.

**(E)-4-(prop-1-en-1-yl)-1,1'-biphenyl**

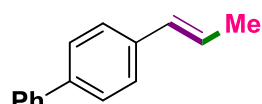

**5ab**

Isolated yield: 91%

Colorless liquid. This compound is known in the literature.<sup>[19]</sup>  $^1\text{H NMR}$  (400 MHz,  $\text{CDCl}_3$ )  $\delta$  7.51 (d,  $J = 8.0$  Hz, 2H), 7.45 (d,  $J = 8.3$  Hz, 2H), 7.33 (q,  $J = 7.8$  Hz, 4H), 7.24 (t,  $J = 7.4$  Hz, 1H), 6.36 (d,  $J = 17.6$  Hz, 1H), 6.26 – 6.15 (m, 1H), 1.82 (dd,  $J =$

6.6, 1.6 Hz, 3H).  $^{13}\text{C}$  NMR (101 MHz,  $\text{CDCl}_3$ )  $\delta$  140.90, 139.51, 137.03, 130.61, 128.78, 127.21, 127.16, 126.91, 126.25, 125.93, 18.61.

#### (Z)-1-Methoxy-4-(prop-1-en-1-yl)benzene

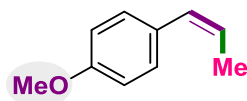

5cb

Isolated yield: 89%

Colorless liquid. This compound is known in the literature.<sup>[20]</sup>  $^1\text{H}$  NMR (400 MHz,  $\text{CDCl}_3$ )  $\delta$  7.27 – 7.21 (m, 2H), 6.91 – 6.78 (m, 2H), 6.36 (dd,  $J = 11.5, 2.0$  Hz, 1H), 5.69 (dq,  $J = 11.6, 7.2$  Hz, 1H), 3.80 (s, 3H), 1.88 (dd,  $J = 7.2, 1.7$  Hz, 3H).  $^{13}\text{C}$  NMR (101 MHz,  $\text{CDCl}_3$ )  $\delta$  158.12, 130.35, 130.00, 129.29, 125.10, 113.56, 55.25, 14.60.

#### (Z)-1-(prop-1-en-1-yl)naphthalene

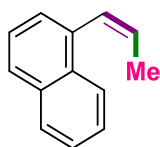

5db

Isolated yield: 93%

Colorless liquid. This compound is known in the literature.<sup>[22]</sup>  $^1\text{H}$  NMR (400 MHz,  $\text{CDCl}_3$ )  $\delta$  7.95 – 7.86 (m, 1H), 7.80 – 7.71 (m, 1H), 7.66 (d,  $J = 8.3$  Hz, 1H), 7.43 – 7.31 (m, 3H), 7.27 (d,  $J = 7.0$  Hz, 1H), 6.81 (d,  $J = 11.4$  Hz, 1H), 5.95 (dq,  $J = 11.4, 7.0$  Hz, 1H), 1.66 (dd,  $J = 7.0, 1.8$  Hz, 3H).  $^{13}\text{C}$  NMR (101 MHz,  $\text{CDCl}_3$ )  $\delta$  134.61, 133.64, 131.96, 128.57, 128.39, 127.94, 127.13, 126.52, 125.79, 125.70, 125.26, 125.08, 14.67.

#### 4-(2-ethyl-1-propen-1-yl)-1,1'-biphenyl

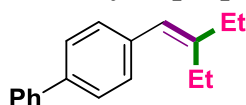

7aa

Isolated yield: 91%

Colorless viscous liquid.  $^1\text{H}$  NMR (400 MHz,  $\text{CDCl}_3$ )  $\delta$  7.60 (d,  $J = 7.2$  Hz, 2H), 7.55 (d,  $J = 8.2$  Hz, 2H), 7.43 (t,  $J = 7.6$  Hz, 2H), 7.31 (dd,  $J = 14.5, 7.8$  Hz, 3H), 6.26 (s, 1H), 2.32 (q,  $J = 7.5$  Hz, 2H), 2.22 (q,  $J = 6.9, 6.4$  Hz, 2H), 1.12 (q,  $J = 7.4$  Hz, 6H).  $^{13}\text{C}$  NMR (101 MHz,  $\text{CDCl}_3$ )  $\delta$  146.97, 141.00, 138.54, 137.77, 129.01, 128.75, 127.07, 126.95, 126.77, 122.82, 29.62, 23.95, 13.13, 12.84. HRMS Calcd for  $\text{C}_{18}\text{H}_{21}^+$   $[\text{M}+\text{H}]^+$  237.1643, found 237.1646.

#### 2-(2-ethylbut-1-en-1-yl)naphthalene

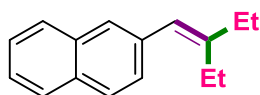

7ba

Isolated yield: 89%

Colorless viscous liquid.  $^1\text{H NMR}$  (400 MHz,  $\text{CDCl}_3$ )  $\delta$  7.78 (t,  $J = 7.8$  Hz, 3H), 7.65 (s, 1H), 7.47 – 7.34 (m, 3H), 6.38 (s, 1H), 2.34 (q,  $J = 7.5$  Hz, 2H), 2.29 – 2.22 (m, 2H), 1.13 (dt,  $J = 15.1, 7.5$  Hz, 6H).  $^{13}\text{C NMR}$  (101 MHz,  $\text{CDCl}_3$ )  $\delta$  147.16, 136.31, 133.50, 131.89, 127.83, 127.57, 127.56, 127.47, 126.86, 125.90, 125.33, 123.28, 29.57, 23.97, 13.19, 12.87. **HRMS** Calcd for  $\text{C}_{16}\text{H}_{19}^+$   $[\text{M}+\text{H}]^+$  211.1481, found 211.1478.

### 1-(2-Ethyl-1-buten-1-yl)-4-methoxybenzene

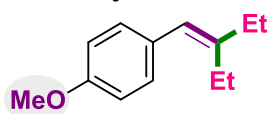

7ca

Isolated yield: 89%

Colorless viscous liquid. This compound is known in the literature.<sup>[23]</sup>  $^1\text{H NMR}$  (400 MHz,  $\text{CDCl}_3$ )  $\delta$  7.15 (d,  $J = 8.7$  Hz, 2H), 6.85 (d,  $J = 8.7$  Hz, 2H), 6.17 (s, 1H), 3.80 (s, 3H), 2.25 (q,  $J = 7.5$  Hz, 2H), 2.18 (q,  $J = 7.4$  Hz, 2H), 1.08 (dt,  $J = 11.4, 7.5$  Hz, 6H).  $^{13}\text{C NMR}$  (101 MHz,  $\text{CDCl}_3$ )  $\delta$  157.70, 145.24, 131.28, 129.64, 122.60, 113.49, 55.24, 29.48, 23.73, 13.09, 12.85.

### 1-(2-ethylbut-1-en-1-yl)naphthalene

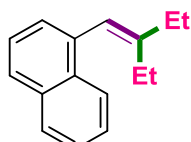

7da

Isolated yield: 72%

Colorless viscous liquid. This compound is known in the literature.<sup>[24]</sup>  $^1\text{H NMR}$  (400 MHz,  $\text{CDCl}_3$ )  $\delta$  8.03 (dd,  $J = 6.1, 3.5$  Hz, 1H), 7.88 (dd,  $J = 6.5, 3.0$  Hz, 1H), 7.78 (d,  $J = 8.2$  Hz, 1H), 7.54 – 7.45 (m, 3H), 7.33 (d,  $J = 7.0$  Hz, 1H), 6.64 (s, 1H), 2.37 (q,  $J = 7.4$  Hz, 2H), 2.14 (q,  $J = 7.5$  Hz, 2H), 1.27 (t,  $J = 7.5$  Hz, 3H), 1.01 (t,  $J = 7.6$  Hz, 3H).  $^{13}\text{C NMR}$  (101 MHz,  $\text{CDCl}_3$ )  $\delta$  147.83, 136.26, 133.55, 132.34, 128.26, 126.61, 126.28, 125.60, 125.54, 125.38, 125.35, 121.04, 28.73, 24.20, 13.22, 12.98.

### (E)-(4-Ethylhexa-1,3-dien-1-yl)benzene

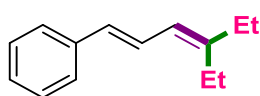

7ea

Isolated yield: 90%

Colorless viscous liquid. This compound is known in the literature.<sup>[25]</sup> **<sup>1</sup>H NMR** (400 MHz, CDCl<sub>3</sub>) δ 7.40 (d, *J* = 7.5 Hz, 2H), 7.30 (t, *J* = 7.6 Hz, 2H), 7.18 (t, *J* = 7.3 Hz, 1H), 7.03 (dd, *J* = 15.5, 11.0 Hz, 1H), 6.47 (d, *J* = 15.5 Hz, 1H), 5.97 (d, *J* = 11.0 Hz, 1H), 2.30 (q, *J* = 7.6 Hz, 2H), 2.16 (q, *J* = 7.4 Hz, 2H), 1.07 (td, *J* = 7.5, 2.5 Hz, 6H). **<sup>13</sup>C NMR** (101 MHz, CDCl<sub>3</sub>) δ 148.10, 138.17, 129.99, 128.55, 126.90, 126.10, 125.44, 123.17, 29.78, 24.17, 13.70, 12.70.

#### 4-ethyl-4'-(2-ethylbut-1-en-1-yl)-1,1'-biphenyl

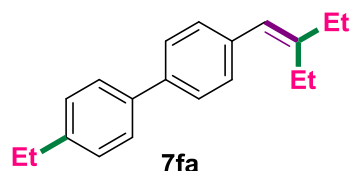

Isolated yield: 92%

Colorless viscous liquid. **<sup>1</sup>H NMR** (400 MHz, CDCl<sub>3</sub>) δ 7.52 (dd, *J* = 8.1, 3.7 Hz, 4H), 7.30 – 7.22 (m, 4H), 6.25 (s, 1H), 2.67 (q, *J* = 7.6 Hz, 2H), 2.31 (q, *J* = 7.5 Hz, 2H), 2.21 (qd, *J* = 7.4, 1.4 Hz, 2H), 1.26 (t, *J* = 7.6 Hz, 3H), 1.11 (q, *J* = 7.2 Hz, 6H). **<sup>13</sup>C NMR** (101 MHz, CDCl<sub>3</sub>) δ 146.83, 143.24, 138.58, 138.44, 137.51, 129.03, 128.34, 126.92, 126.67, 122.97, 29.69, 28.60, 15.67, 13.18, 12.90. **HRMS** Calcd for C<sub>20</sub>H<sub>25</sub><sup>+</sup> [M+H]<sup>+</sup> 265.1951, found 265.1950.

#### 4-(2-methyl-1-propen-1-yl)-1,1'-biphenyl

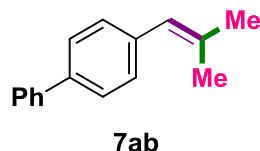

Isolated yield: 89%

Colorless viscous liquid. This compound is known in the literature.<sup>[26]</sup> **<sup>1</sup>H NMR** (400 MHz, CDCl<sub>3</sub>) δ 7.52 (d, *J* = 7.8 Hz, 2H), 7.48 (d, *J* = 8.2 Hz, 2H), 7.35 (t, *J* = 7.6 Hz, 2H), 7.24 (dd, *J* = 12.0, 8.2 Hz, 3H), 6.22 (s, 1H), 1.85 (dd, *J* = 6.2 Hz, 6H). **<sup>13</sup>C NMR** (101 MHz, CDCl<sub>3</sub>) δ 141.01, 138.52, 137.78, 135.85, 129.14, 128.75, 127.09, 126.97, 126.75, 124.76, 27.03, 19.56.

#### 1-Methoxy-4(2-Methylprop-1-en-1-yl)benzene

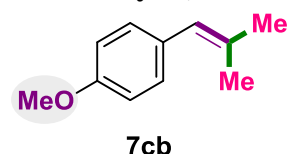

Isolated yield: 82%

Colorless viscous liquid. This compound is known in the literature.<sup>[23]</sup> **<sup>1</sup>H NMR** (400 MHz, CDCl<sub>3</sub>) δ 7.15 (d, *J* = 8.5 Hz, 2H), 6.85 (d, *J* = 8.7 Hz, 2H), 6.20 (s, 1H), 3.78 (s, 3H), 1.88 (s, 3H), 1.84 (s, 3H). **<sup>13</sup>C NMR** (101 MHz, CDCl<sub>3</sub>) δ 157.68, 133.94, 131.38, 129.81, 124.55, 113.49, 55.22, 26.83, 19.34.

**(4-ethylhex-3-en-1-yl)benzene**

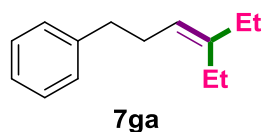

Isolated yield: 65%

Colorless liquid. This compound is known in the literature.<sup>[27]</sup>  $^1\text{H NMR}$  (400 MHz,  $\text{CDCl}_3$ )  $\delta$  7.30 – 7.23 (m, 2H), 7.18 (m,  $J = 8.3, 2.3$  Hz, 3H), 5.13 (t,  $J = 7.2$  Hz, 1H), 2.64 (dd,  $J = 9.0, 6.7$  Hz, 2H), 2.35 – 2.27 (m, 2H), 2.00 (dq,  $J = 7.5, 0.9$  Hz, 4H), 0.98 (t,  $J = 7.4$  Hz, 3H), 0.90 (t,  $J = 7.6$  Hz, 3H).

**(4-methylpent-3-en-1-yl)benzene**

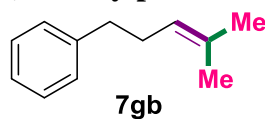

Isolated yield: 58%

Colorless liquid. This compound is known in the literature.<sup>[28]</sup>  $^1\text{H NMR}$  (400 MHz,  $\text{CDCl}_3$ )  $\delta$  7.30 – 7.24 (m, 2H), 7.22 – 7.13 (m, 3H), 5.25 – 5.06 (m, 1H), 2.68 – 2.58 (m, 2H), 2.29 (dd,  $J = 14.3, 8.6$  Hz, 2H), 1.69 (s, 3H), 1.56 (s, 3H).



## References

- [1] Sakaguchi H, Uetake Y, Ohashi M, et al. Copper-Catalyzed Regioselective Monodefluoroborylation of Polyfluoroalkenes en Route to Diverse Fluoroalkenes. *Journal of the American Chemical Society*, 2017, **139**: 12855-12862.
- [2] Kojima R, Kubota K, Ito H. Stereodivergent hydrodefluorination of *gem*-difluoroalkenes: selective synthesis of (*Z*)- and (*E*)-monofluoroalkenes. *Chemical Communication*, 2017, **53**: 10688-10691.
- [3] Espinal-Viguri M, Neale S E, Coles N T, et al. Room Temperature Iron-Catalyzed Transfer Hydrogenation and Regioselective Deuteration of Carbon–Carbon Double Bonds. *Journal of the American Chemical Society*, 2019, **141**: 572-582.
- [4] Liu X, Hsiao C-C, Kalvet I, et al. Lewis Acid Assisted Nickel-Catalyzed Cross-Coupling of Aryl Methyl Ethers by C–O Bond-Cleaving Alkylation: Prevention of Undesired  $\beta$ -Hydride Elimination. *Angewandte Chemie International Edition*, 2016, **55**: 6093-6098.
- [5] Qian H, Yu S, Song L, et al. ONO pincer palladium (II) complexes featuring furoylhydrazone ligands: Synthesis, characterization and catalytic activity towards Suzuki–Miyaura coupling reaction. *Applied Organometallic Chemistry*, 2019, **33**: 5116.
- [6] Ho Y A, Leiendecker M, Liu X, et al. Nickel-Catalyzed  $Csp^2$ – $Csp^3$  Bond Formation via C–F Bond Activation. *Organic Letters*, 2018, **20**: 5644-5647.
- [7] Flinker M, Yin H, Juhl R W, et al. Efficient Water Reduction with  $sp^3$ - $sp^3$  Diboron(4) Compounds: Application to Hydrogenations, H–D Exchange Reactions, and Carbonyl Reductions. *Angewandte Chemie International Edition*, 2017, **56**: 15910-15915.
- [8] Sloane S E, Reyes A, Vang Z P, et al. Copper-Catalyzed Formal Transfer Hydrogenation/Deuteration of Aryl Alkynes. *Organic Letters*, 2020, **22**: 9139-9144.
- [9] Afewerki S, Palo-Nieto C, Córdova. A Efficient Heterogeneous Palladium-Catalyzed Transfer Hydrogenolysis of Benzylic Alcohols by Formic Acid. *Synthesis*, 2020, **52**: 2330-2336.
- [10] Chen W, Wang J. Synthesis of Pyrrole Derivatives from Diallyl amines by One-Pot Tandem Ring-Closing Metathesis and Metal-Catalyzed Oxidative Dehydrogenation. *Organometallics*, 2013, **32**: 1958-1963.
- [11] Li K, Khan R, Zhang X, et al. Cobalt catalyzed stereodivergent semi-hydrogenation of alkynes using H<sub>2</sub>O as the hydrogen source. *Chemical Communication*, 2019, **55**: 5663-5666.
- [12] Bartolomeu A A, Silva R C, Brocksom T J, et al. Photoarylation of Pyridines Using Aryldiazonium Salts and Visible Light: An EDA Approach. *Journal of Organometallic Chemistry*, 2019, **84**: 10459-10471.
- [13] Ramakrishna V, Rani M J, Reddy N D A Zwitterionic. Palladium(II) Complex as a Precatalyst for Neat-Water-Mediated Cross-Coupling Reactions of Heteroaryl, Benzyl, and Aryl Acid Chlorides with Organoboron Reagents. *European Journal of Organic Chemistry*, 2017, **2017**: 7238-7255.
- [14] Khan M, Shaik M R, Adil S F, et al. Facile synthesis of Pd@graphene nanocomposites with enhanced catalytic activity towards Suzuki coupling reaction. *Scientific Reports*, 2020, **10**: 11728.
- [15] Rafiee F, Khavari P, Payami Z, et al. Palladium nanoparticles immobilized on the magnetic few layer graphene support as a highly efficient catalyst for ligand free Suzuki cross coupling and homo coupling reactions. *Journal of Organometallic Chemistry*, 2019, **883**: 78-85.
- [16] Chen Q, Wu S, Yan S, et al. Suzuki–Miyaura Cross-Coupling of Sulfoxides. *ACS Catalysis*, 2020, **10**: 8168-8176.
- [17] He Z-T, Li H, Haydl A M, et al. Trimethylphosphate as a Methylating Agent for Cross Coupling: A

Slow-Release Mechanism for the Methylation of Arylboronic Esters. *Journal of the American Chemical Society*, 2018, **140**: 17197-17202.

[18] Yu D-G, Wang X, Zhu R-Y, et al. Direct Arylation/Alkylation/Magnesiumation of Benzyl Alcohols in the Presence of Grignard Reagents via Ni-, Fe-, or Co-Catalyzed  $sp^3$  C–O Bond Activation. *Journal of the American Chemical Society*, 2012, **134**: 14638-14641.

[19] Michigami K, Mita T, Sato Y. Cobalt-Catalyzed Allylic C( $sp^3$ )–H Carboxylation with  $CO_2$ . *Journal of the American Chemical Society*, 2017, **139**: 6094-6097.

[20] Hu M-Y, He P, Qiao T-Z, et al. Iron-Catalyzed Regiodivergent Alkyne Hydrosilylation. *Journal of the American Chemical Society*, 2020, **142**: 16894-16902.

[21] Liu J-T, Jang Y-J, Shih Y-K, et al. Novel Synthesis of Alkenes via Triethylborane-Induced Free-Radical Reactions of Alkyl Iodides and  $\beta$ -Nitrostyrenes. *The Journal of Organic Chemistry*, 2001, **66**: 6021-6028.

[22] Wu Q, Wang L, Jin R, et al. Nickel-Catalyzed Allylic C( $sp^2$ )–H Activation: Stereoselective Allyl Isomerization and Regiospecific Allyl Arylation of Allylarenes. *European Journal of Organic Chemistry*, 2016, **2016**: 5415-5422.

[23] Dai W, Xiao J, Jin G, et al. Palladium- and Nickel-Catalyzed Kumada Cross-Coupling Reactions of *gem*-Difluoroalkenes and Monofluoroalkenes with Grignard Reagents. *The Journal of Organic Chemistry*, 2014, **79**: 10537-10546.

[24] Khalaf, Ali A, Makki, et al. Modern Friedel-Crafts chemistry. Part XVII. Studies on the acid-catalyzed dehydration of 3-( $\alpha$ -naphthylmethyl)-3-pentanol, 2-( $\alpha$ -naphthyl)-1,1-diphenyl-1-ethanol and 2-methyl-2-( $\alpha$ -naphthyl)-2-butanol. *Journal of the Indian Chemical Society*, 1992, **69**: 262-264.

[25] Řehová L, Císařová I, Jahn U. Divergent Reactivity of Alkyl Aryl Sulfones with Bases: Selective Functionalization of *ortho*-Aryl and  $\alpha$ -Alkyl Units Enabled by a Unique Carbanion Transmetalation. *European Journal of Organic Chemistry*, 2014, **2014**: 1461-1476.

[26] Ogawa H, Yang Z-K, Minami H, et al. Revisitation of Organoaluminum Reagents Affords a Versatile Protocol for C–X (X = N, O, F) Bond-Cleavage Cross-Coupling: A Systematic Study. *ACS Catalysis*, 2017, **7**: 3988-3994.

[27] Řehová L, Císařová I, Jahn U. Divergent Reactivity of Alkyl Aryl Sulfones with Bases: Selective Functionalization of *ortho*-Aryl and  $\alpha$ -Alkyl Units Enabled by a Unique Carbanion Transmetalation. *European Journal of Organic Chemistry*, 2014, **2014**: 1461-1476.

[28] Nakagiri T, Murai M, Takai K. Stereospecific Deoxygenation of Aliphatic Epoxides to Alkenes under Rhenium Catalysis. *Organic Letters*, 2015, **17**: 3346-3349.

# <sup>1</sup>H and <sup>13</sup>C NMR spectra

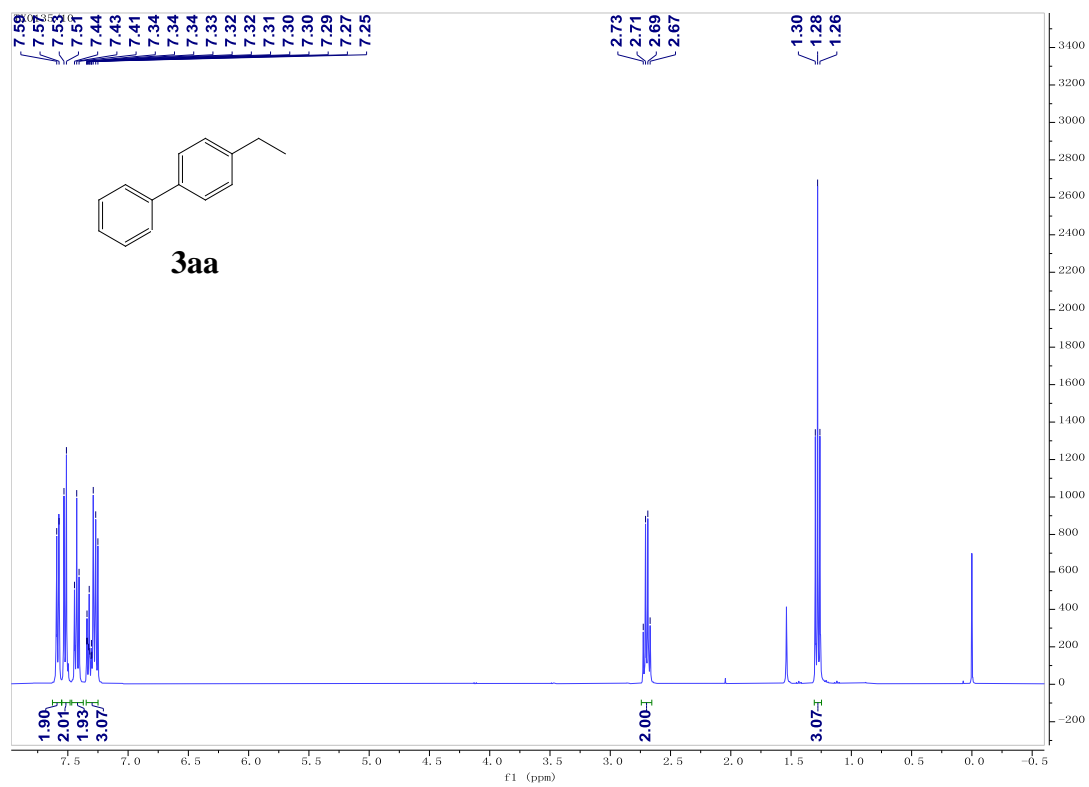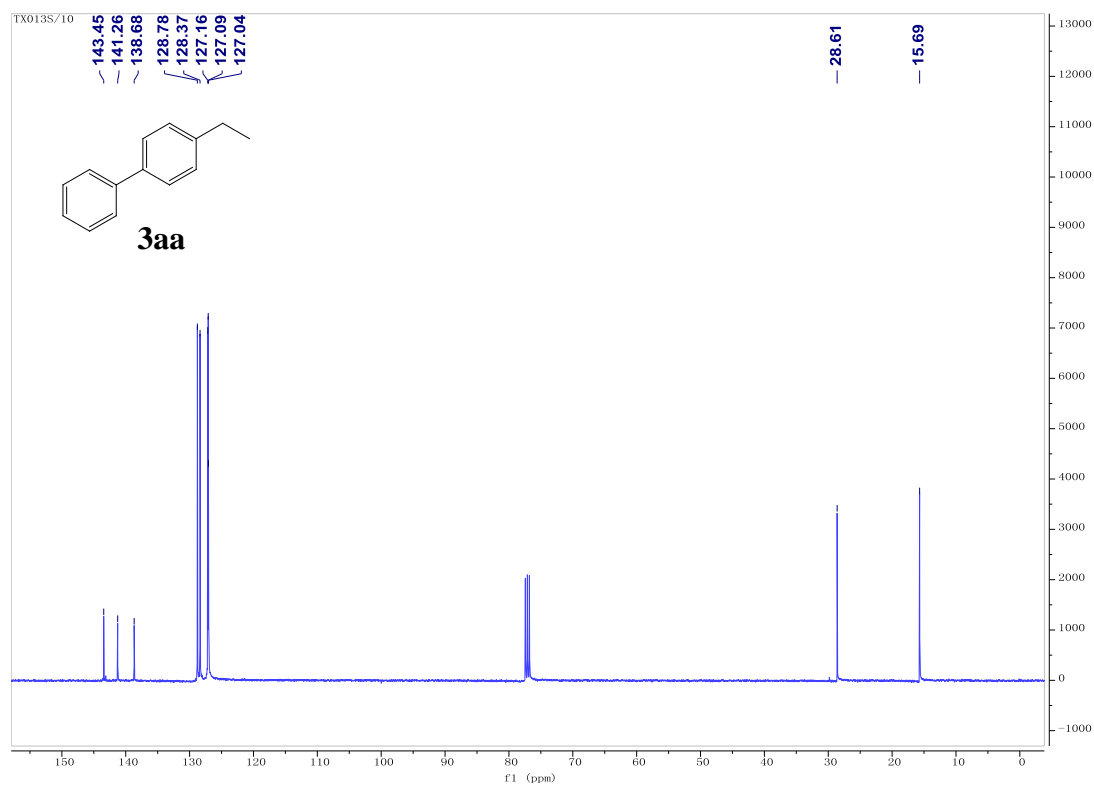

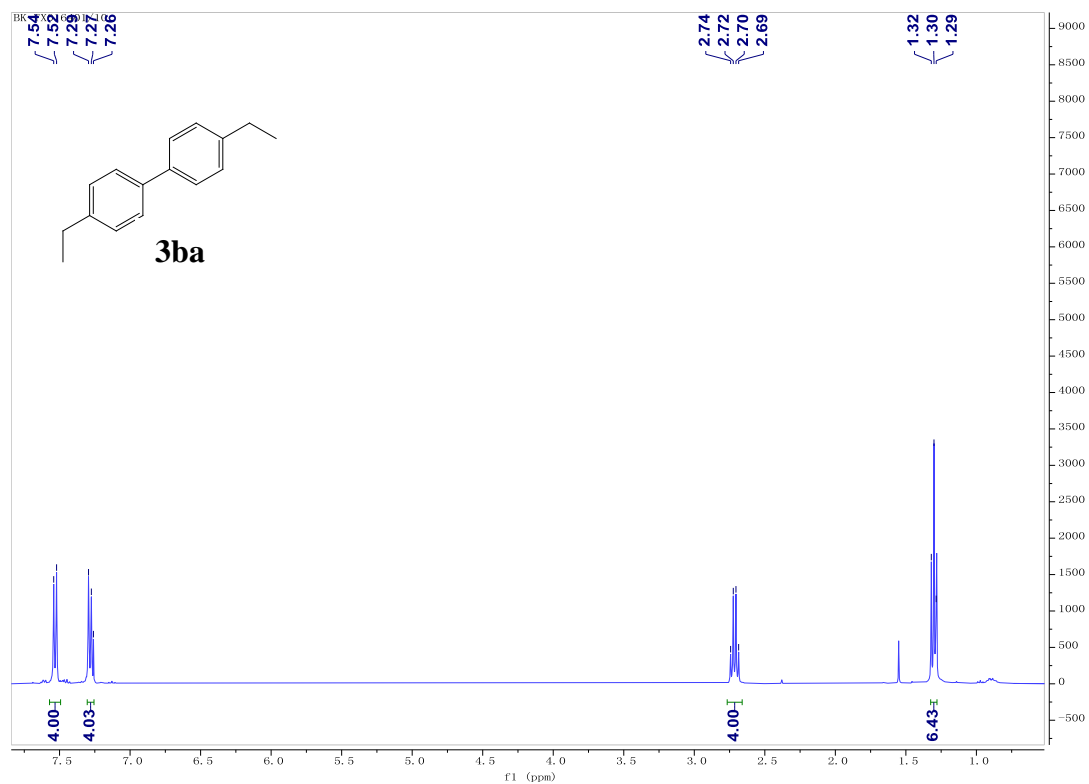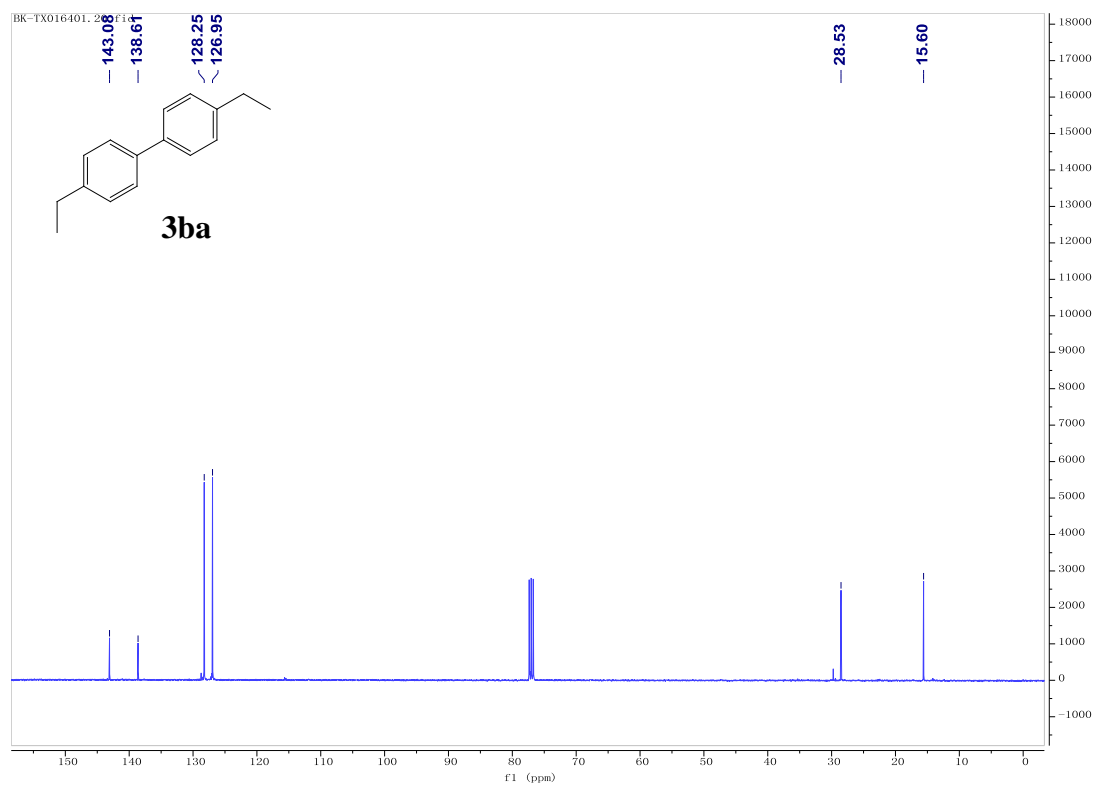

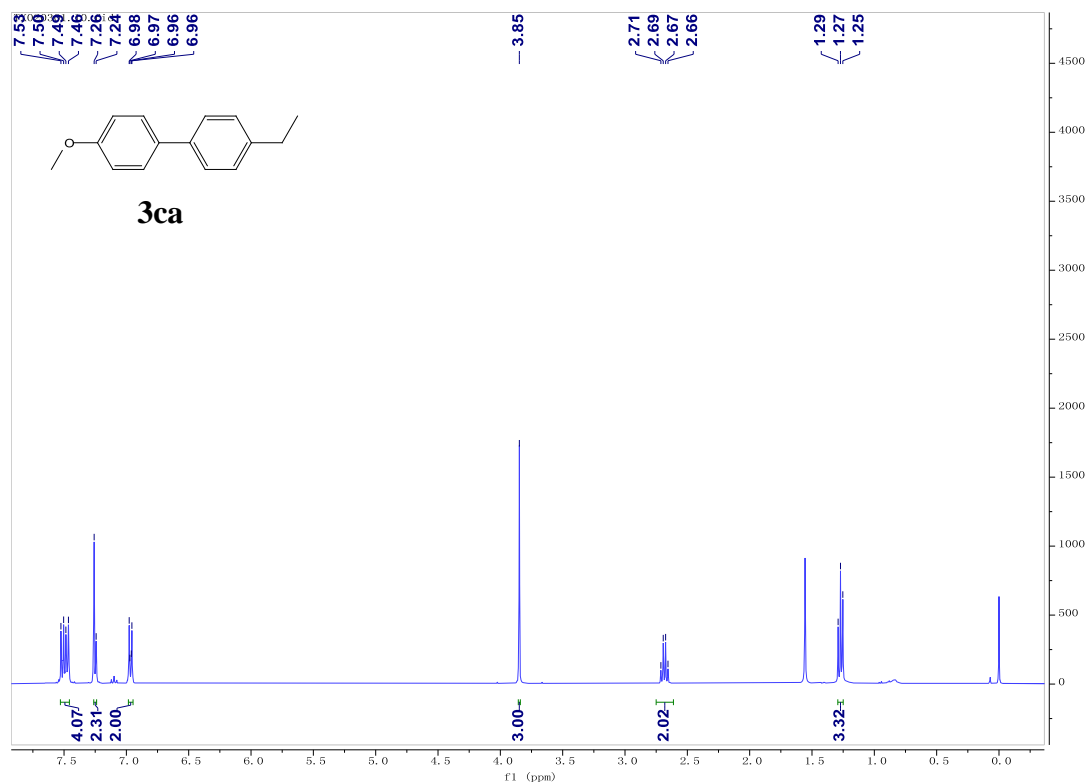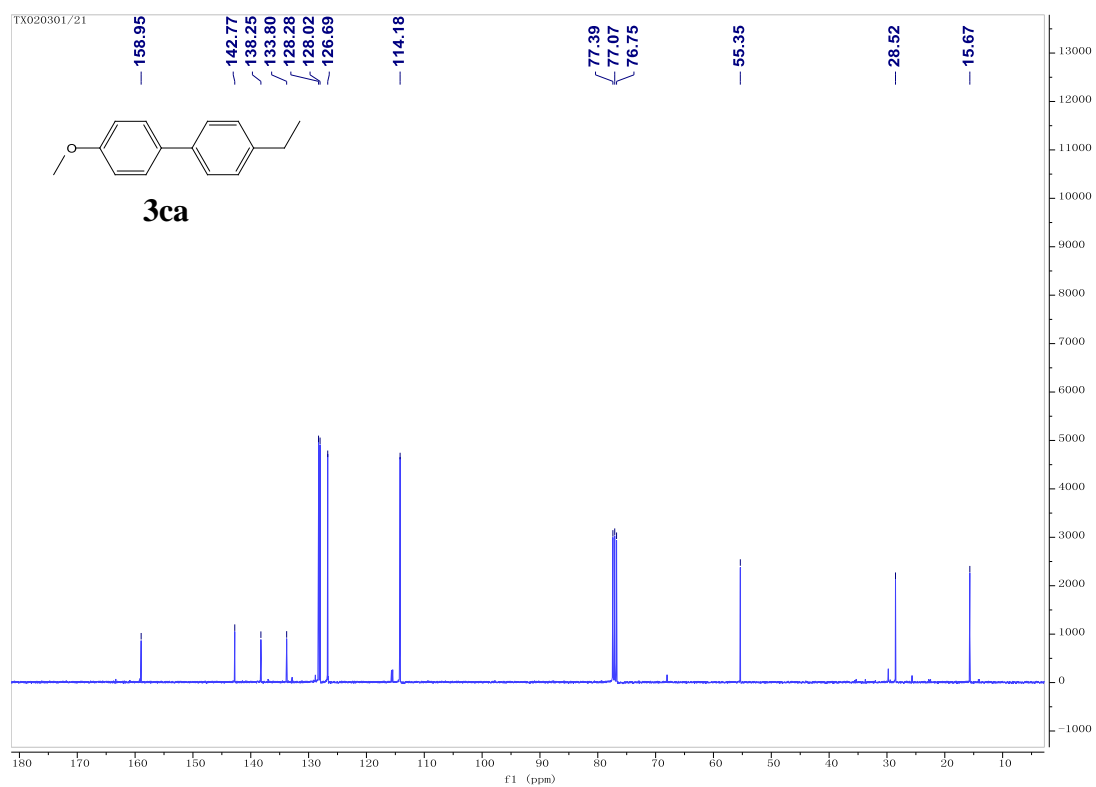

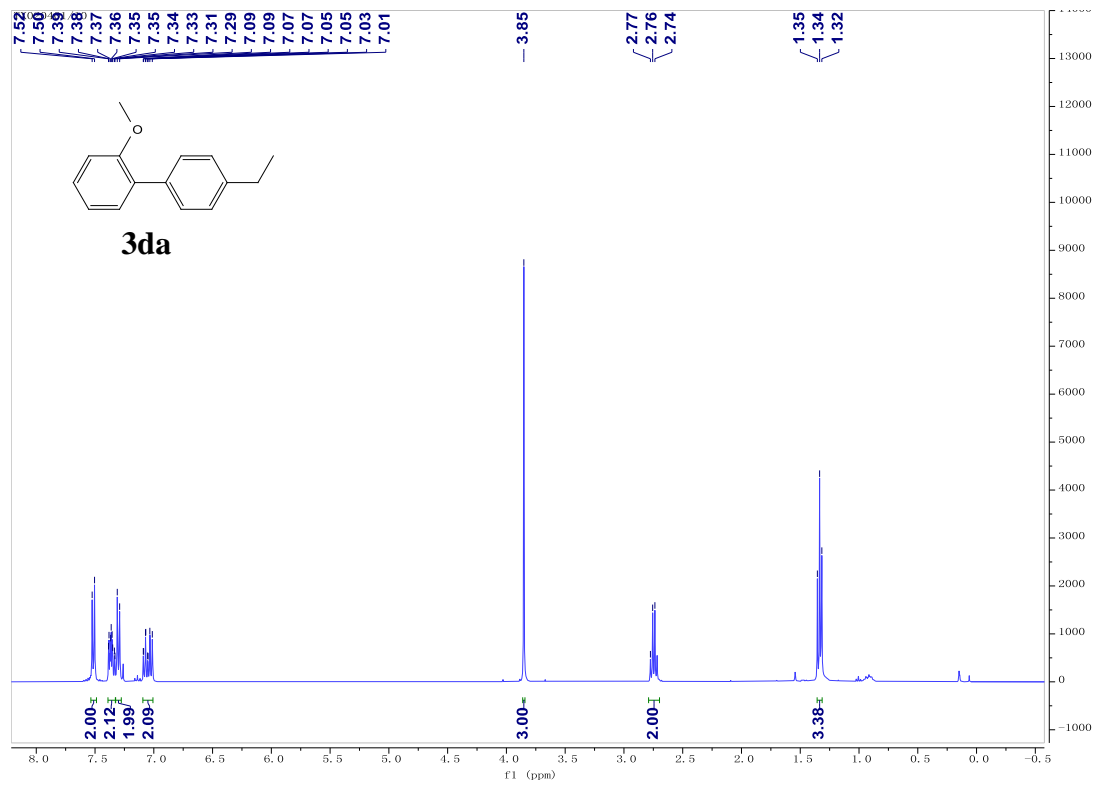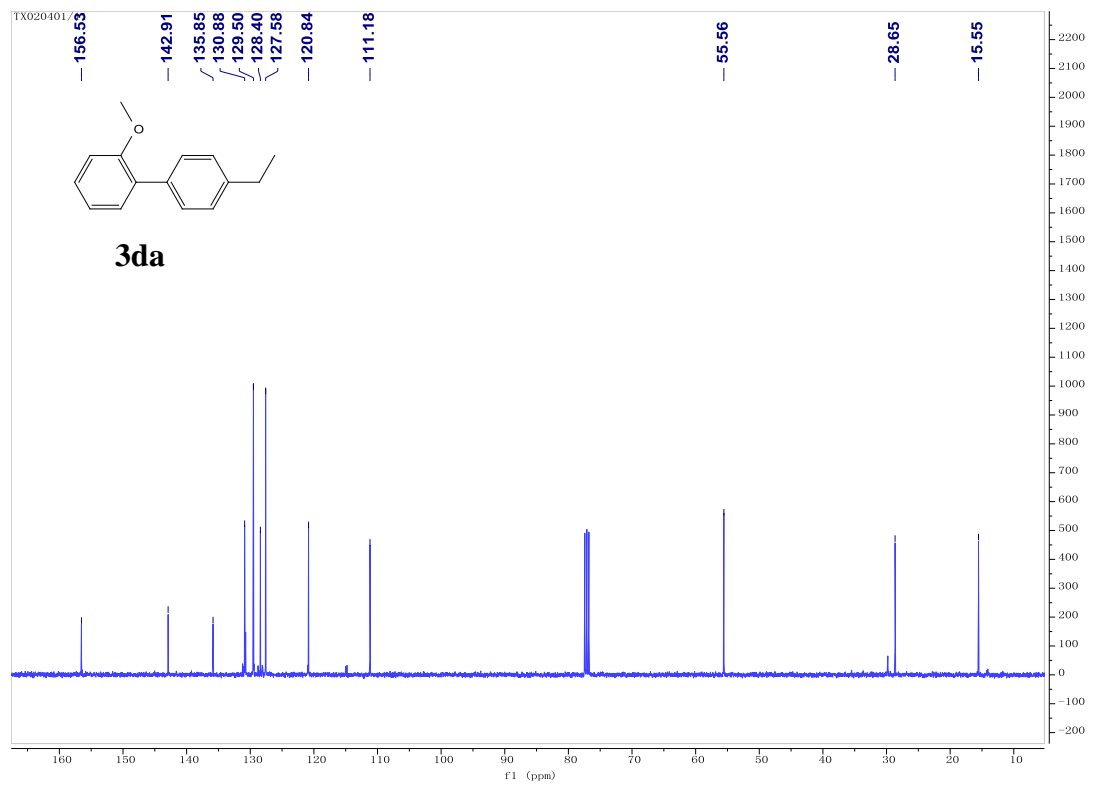

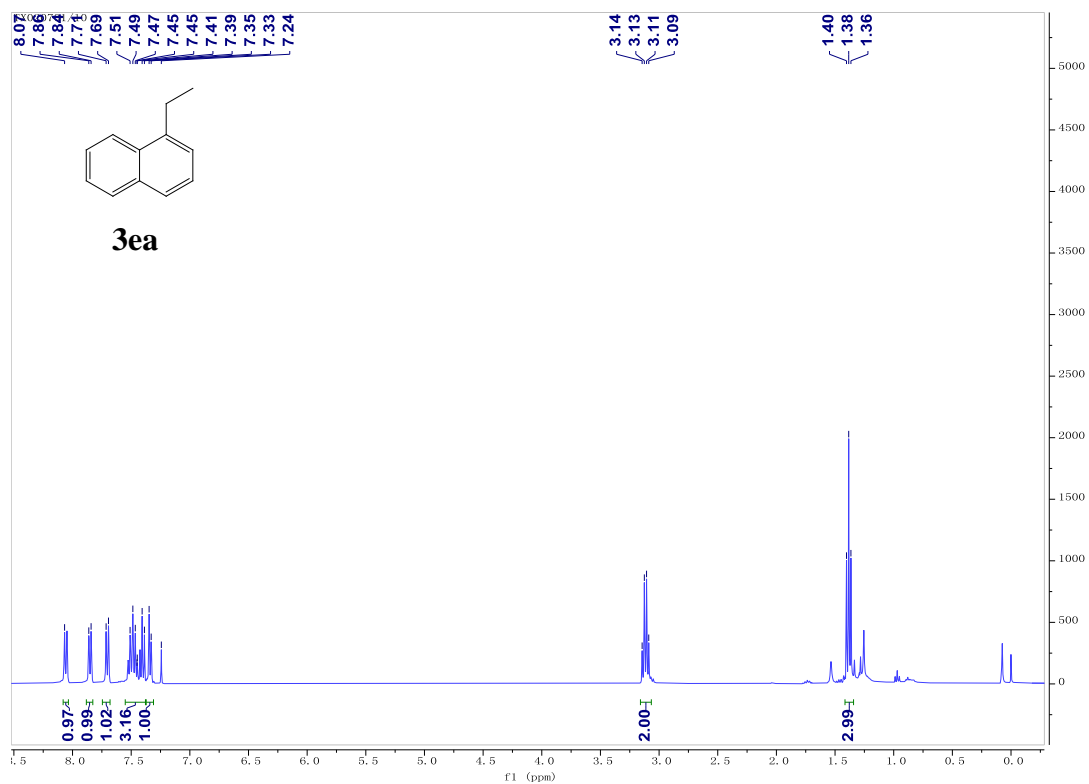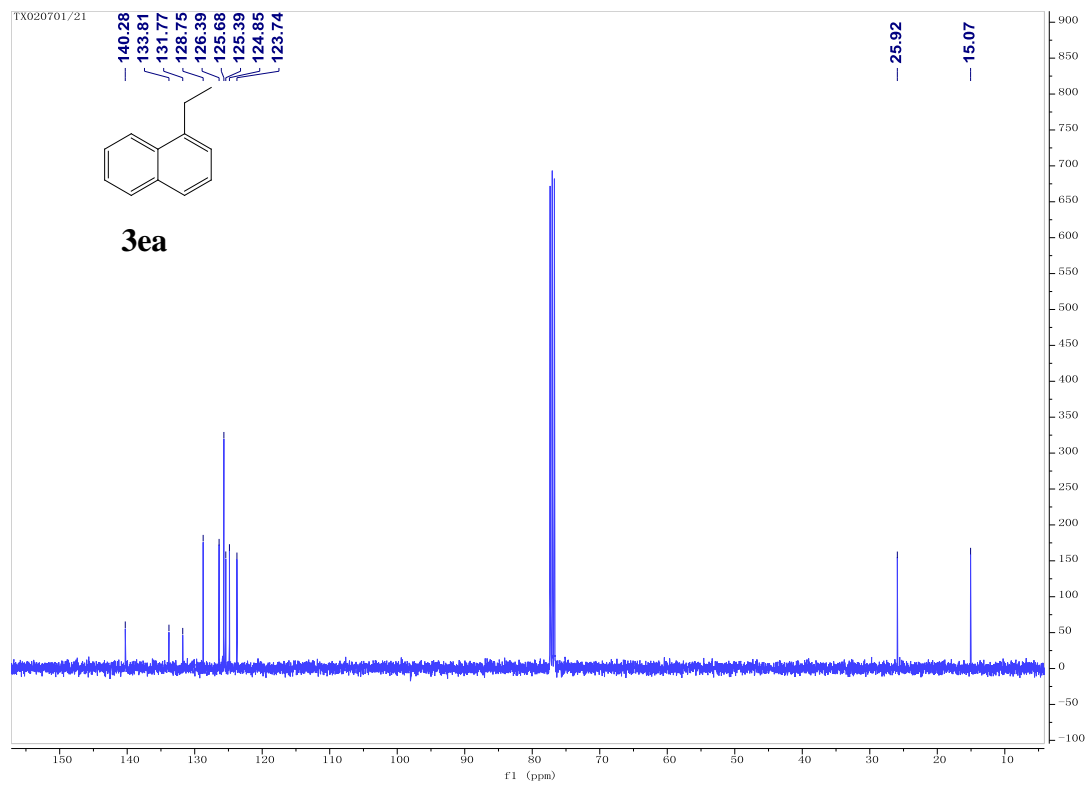

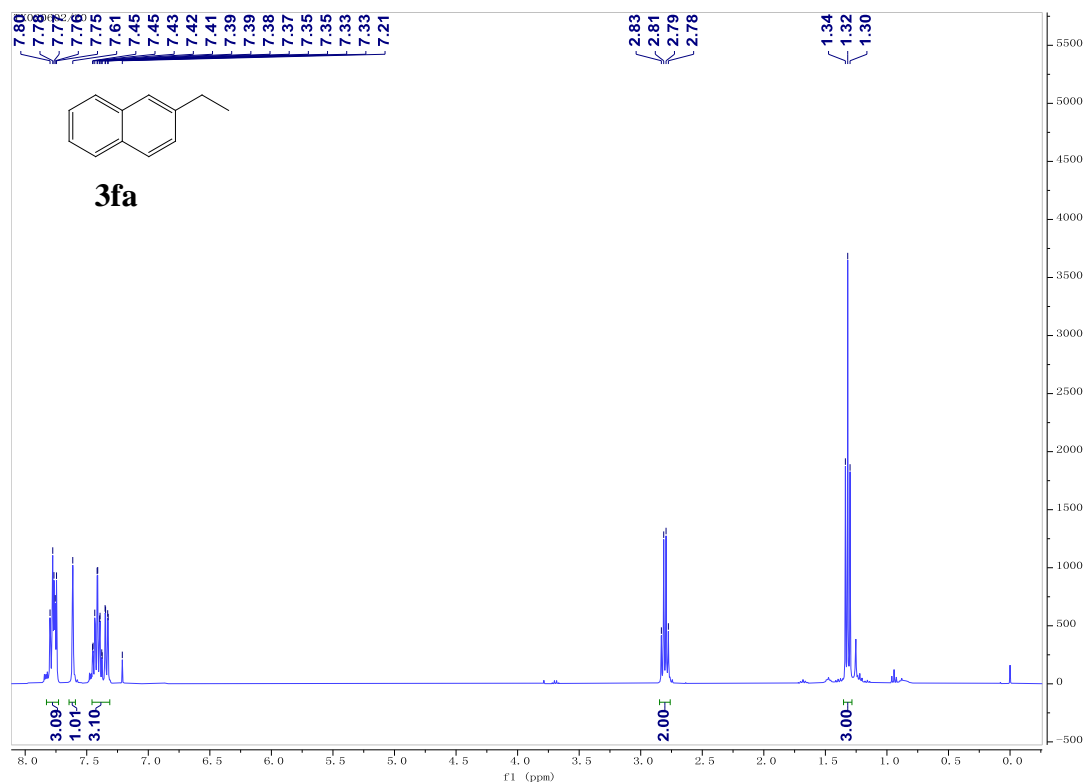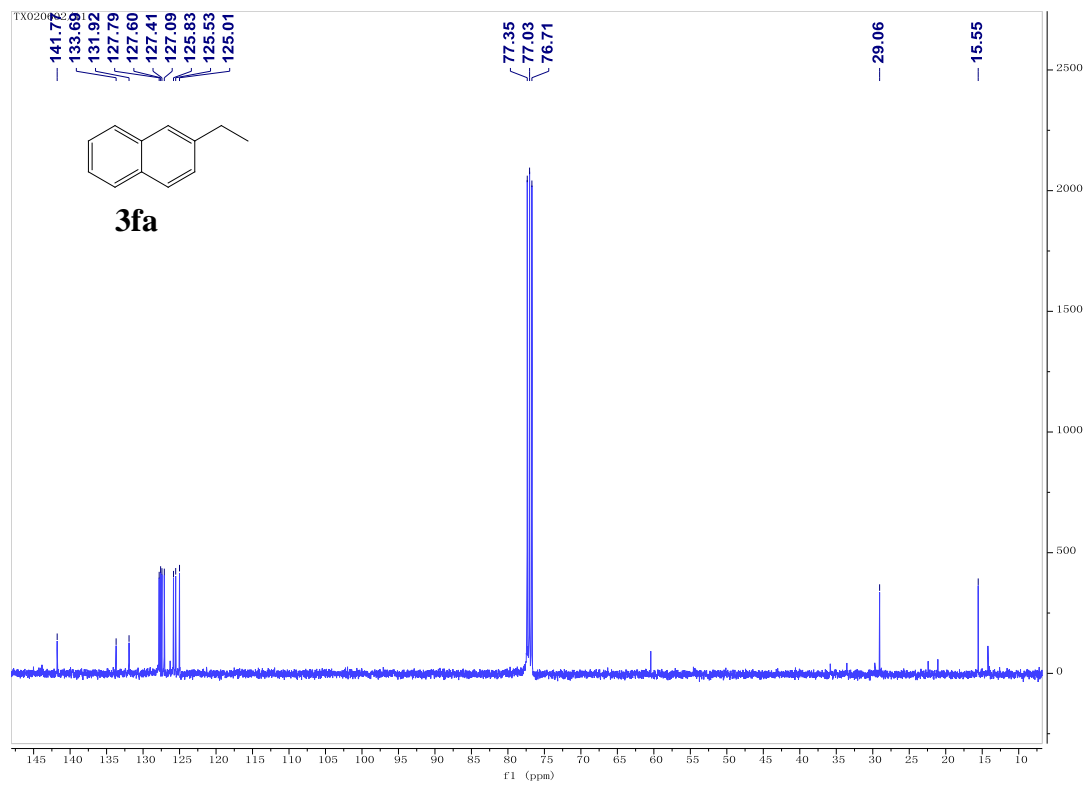



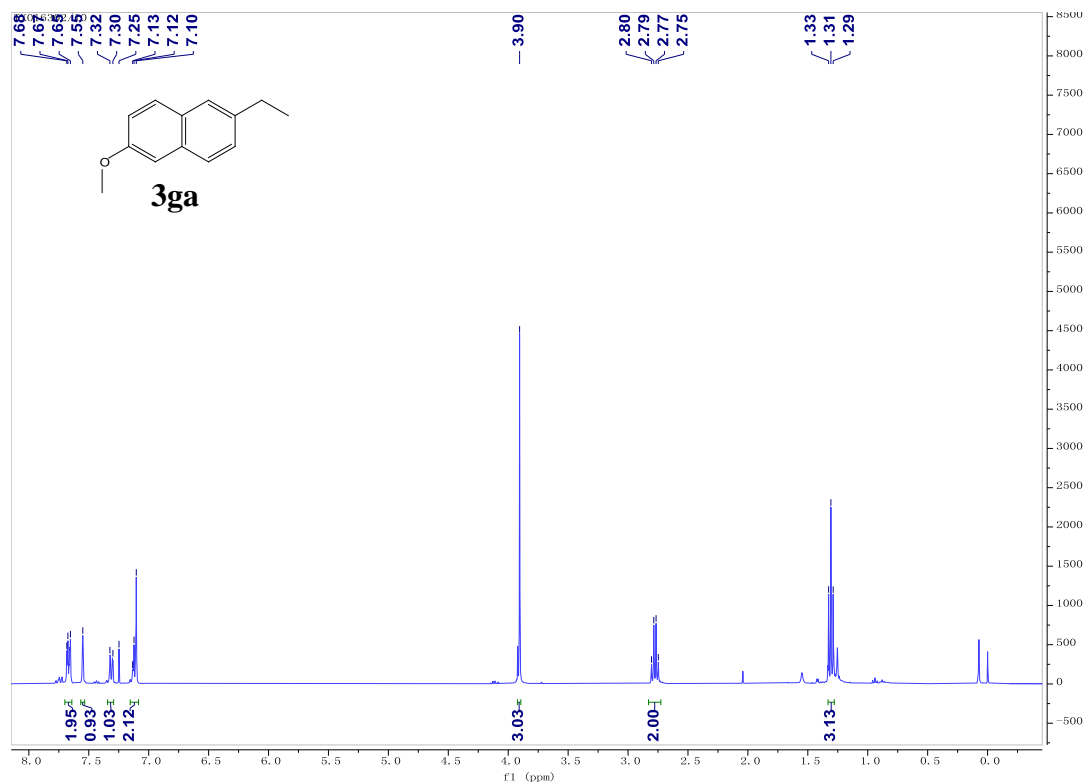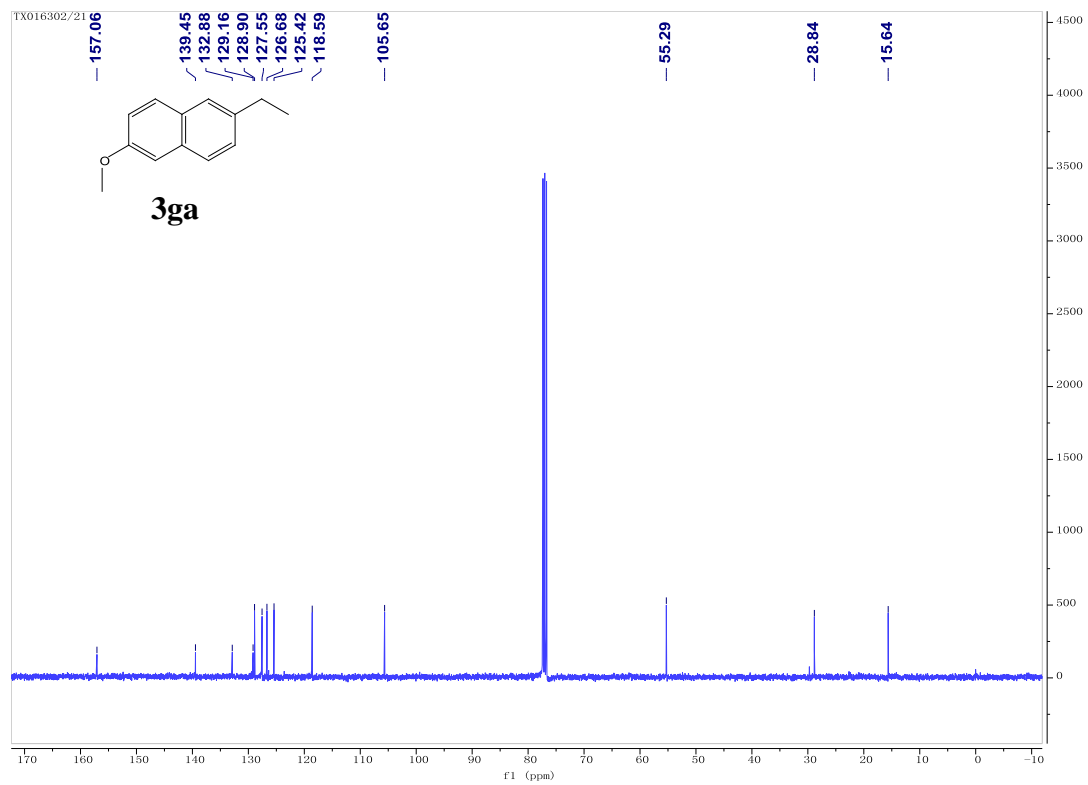

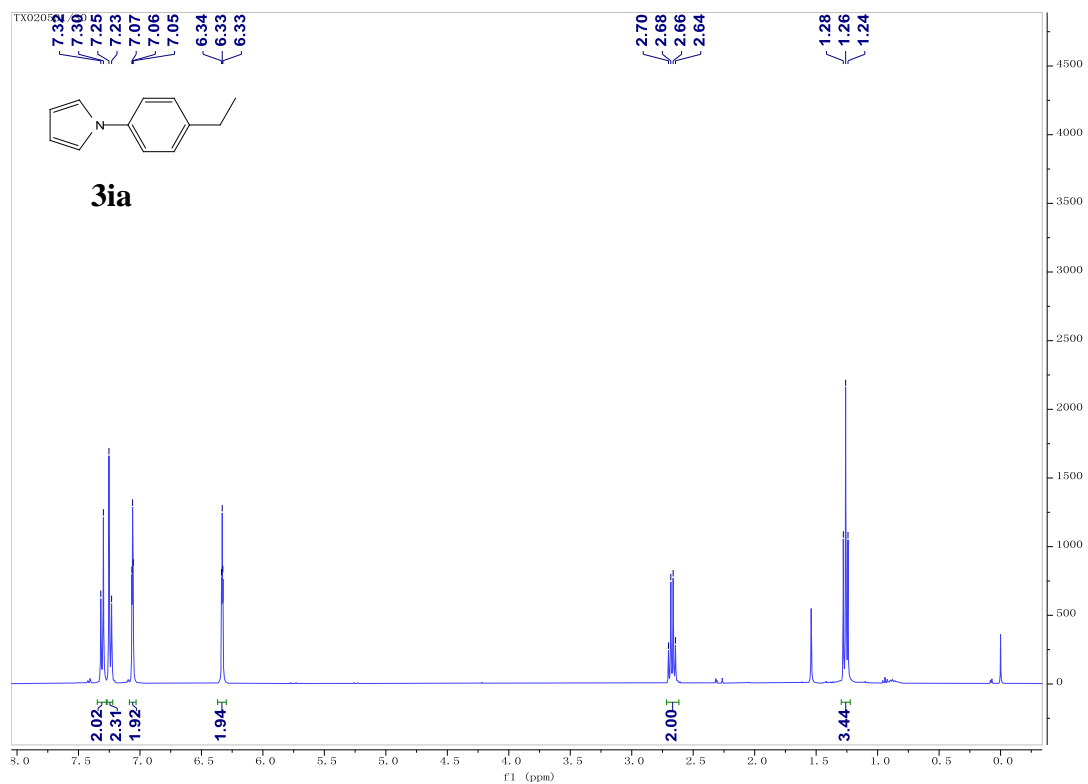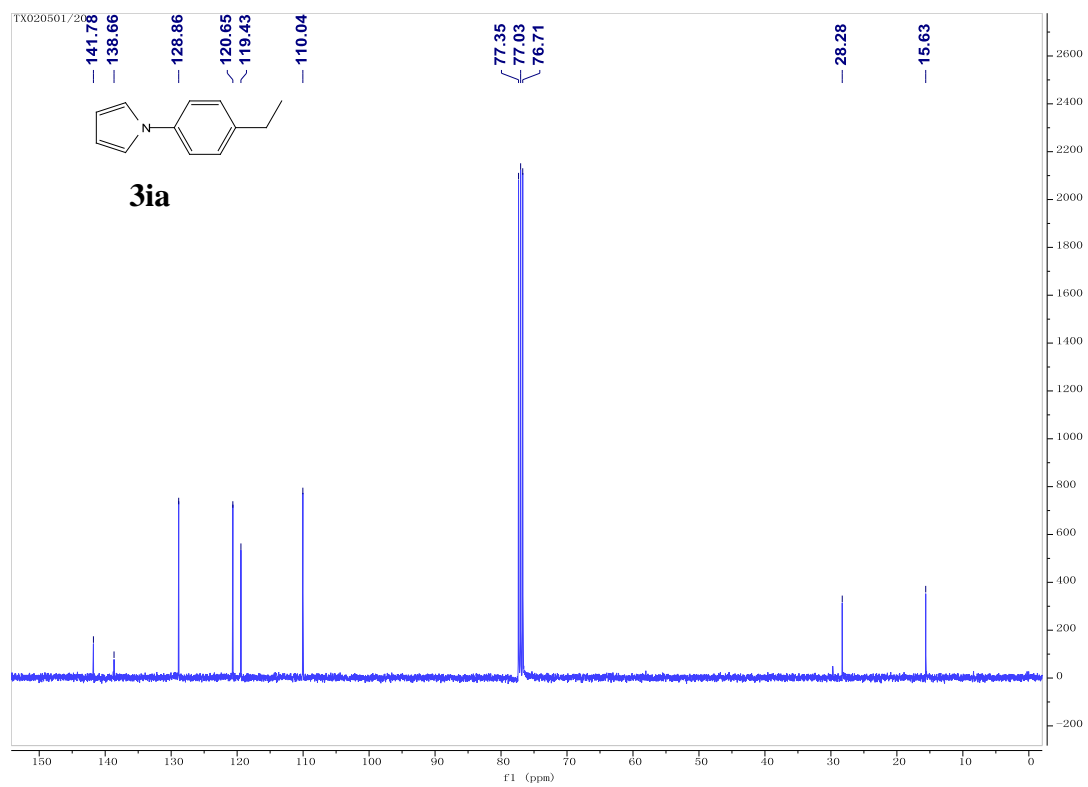

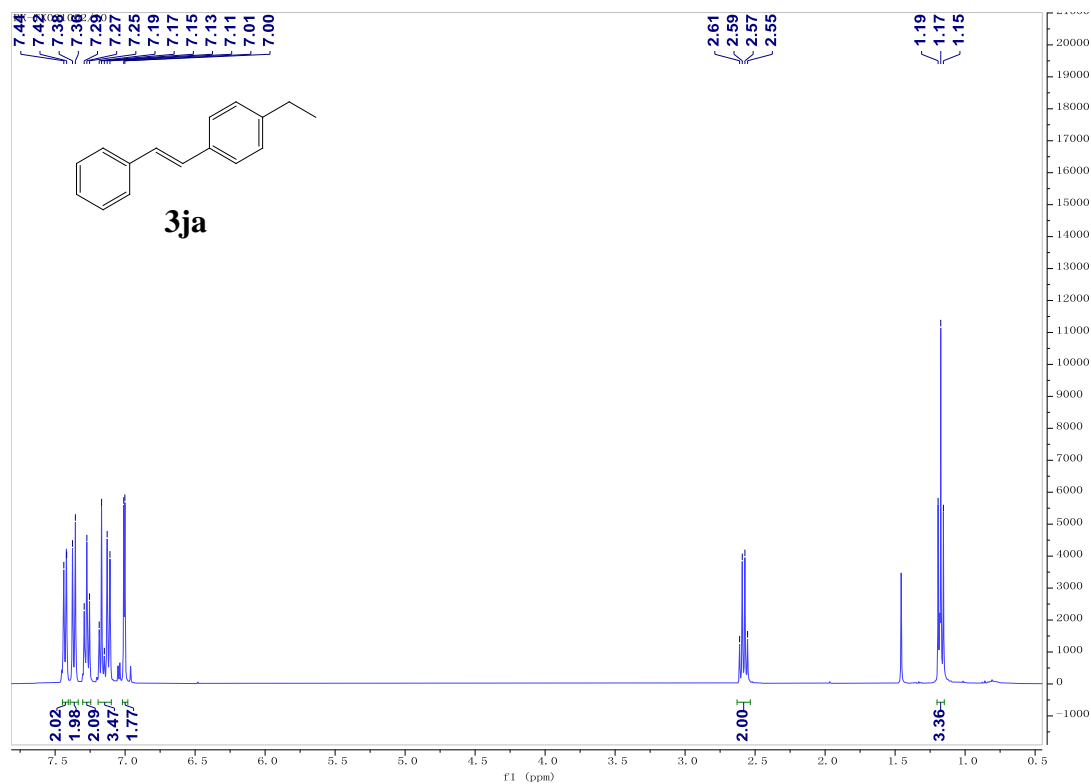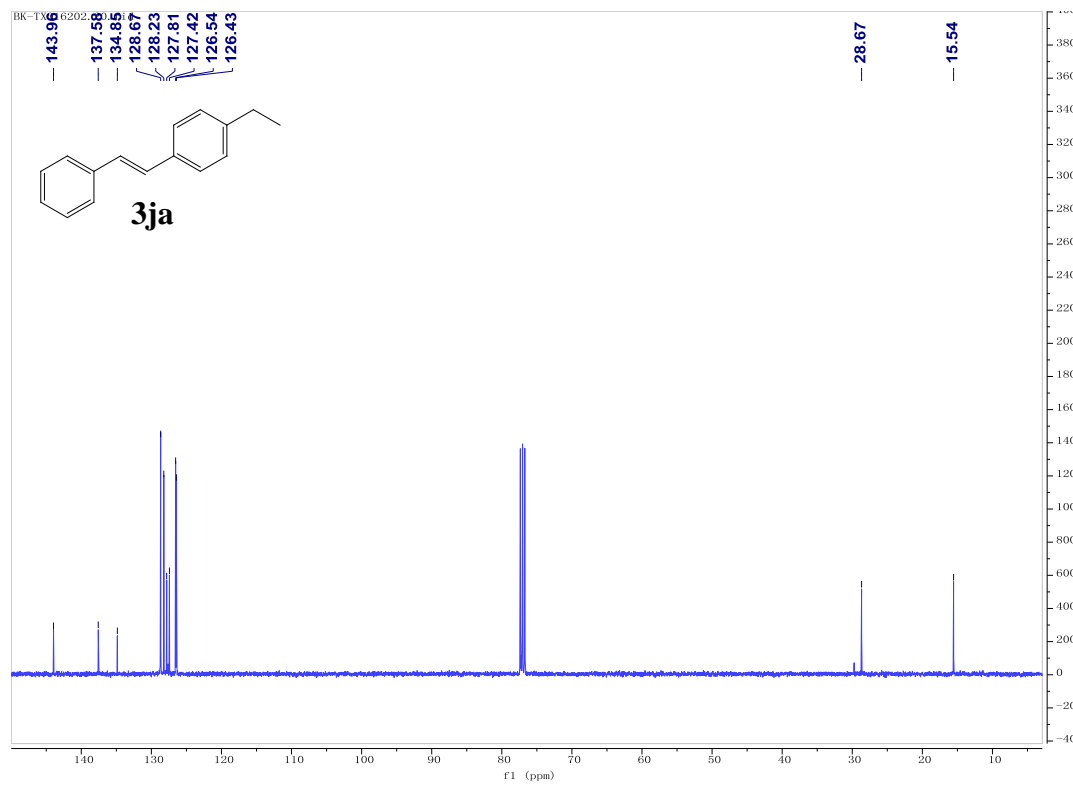

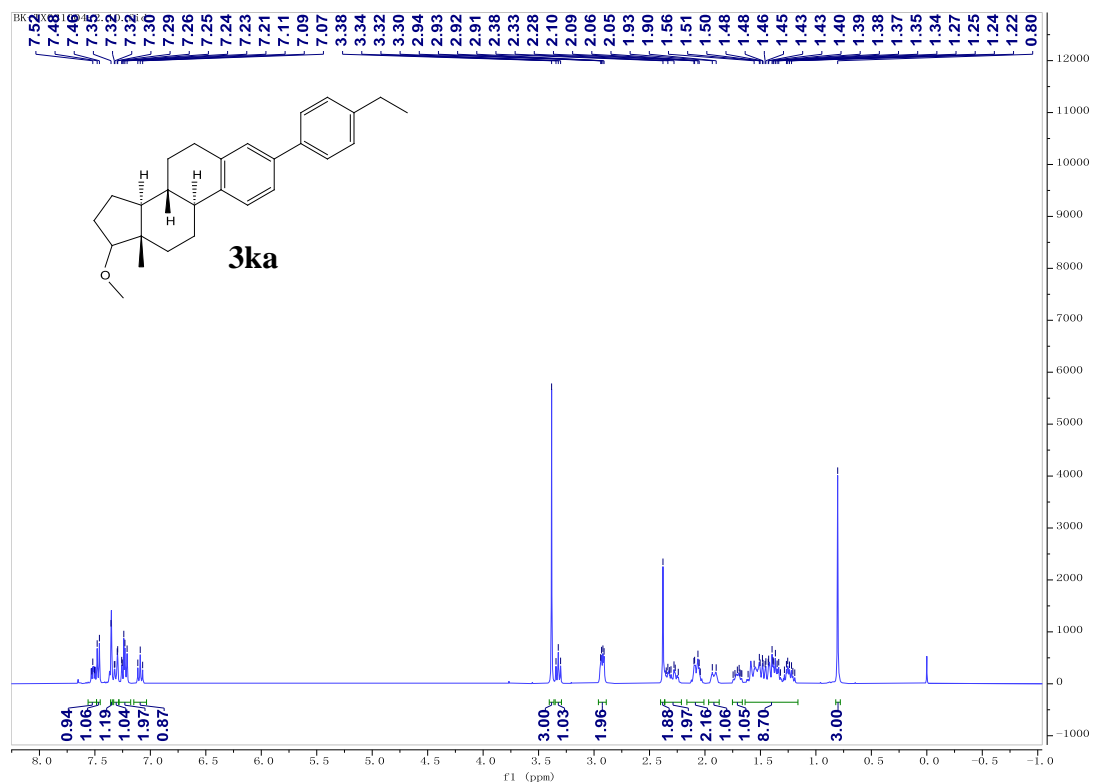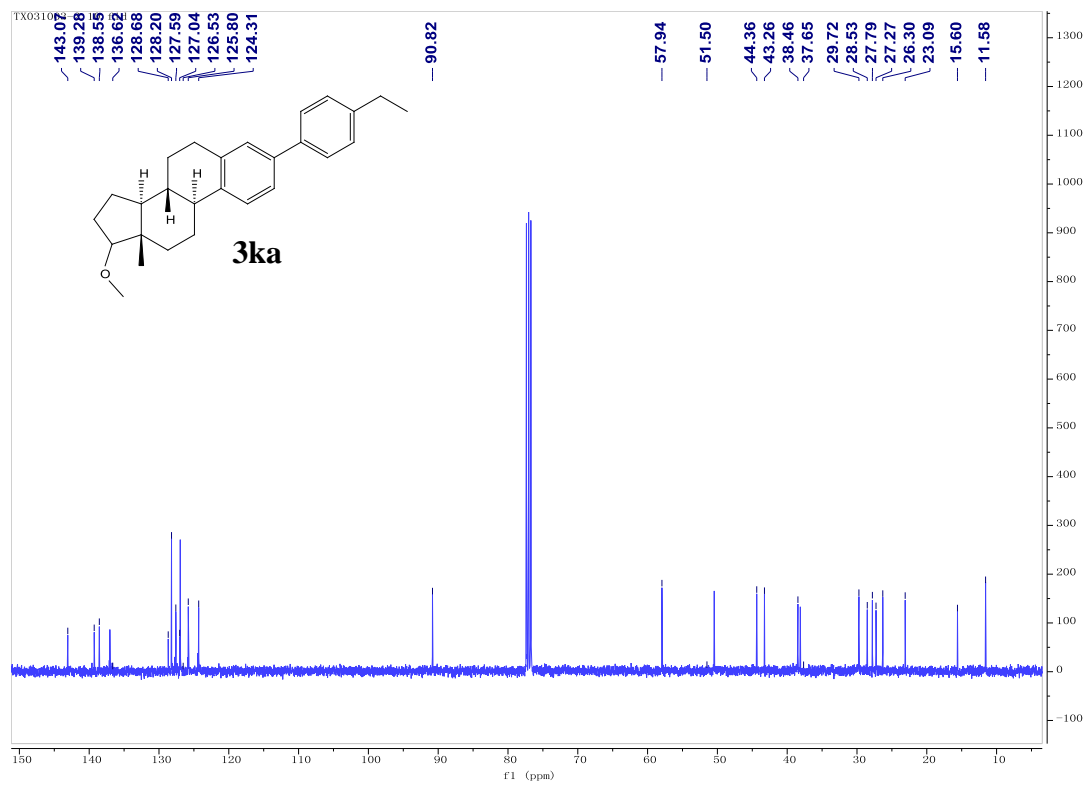

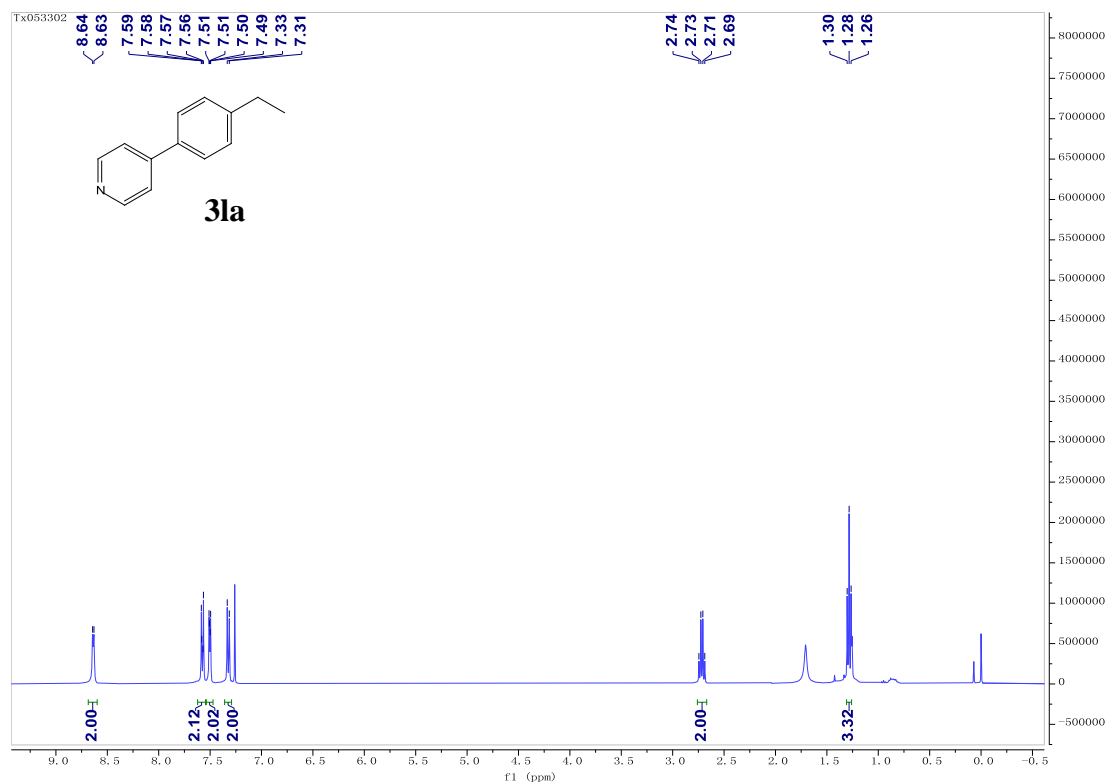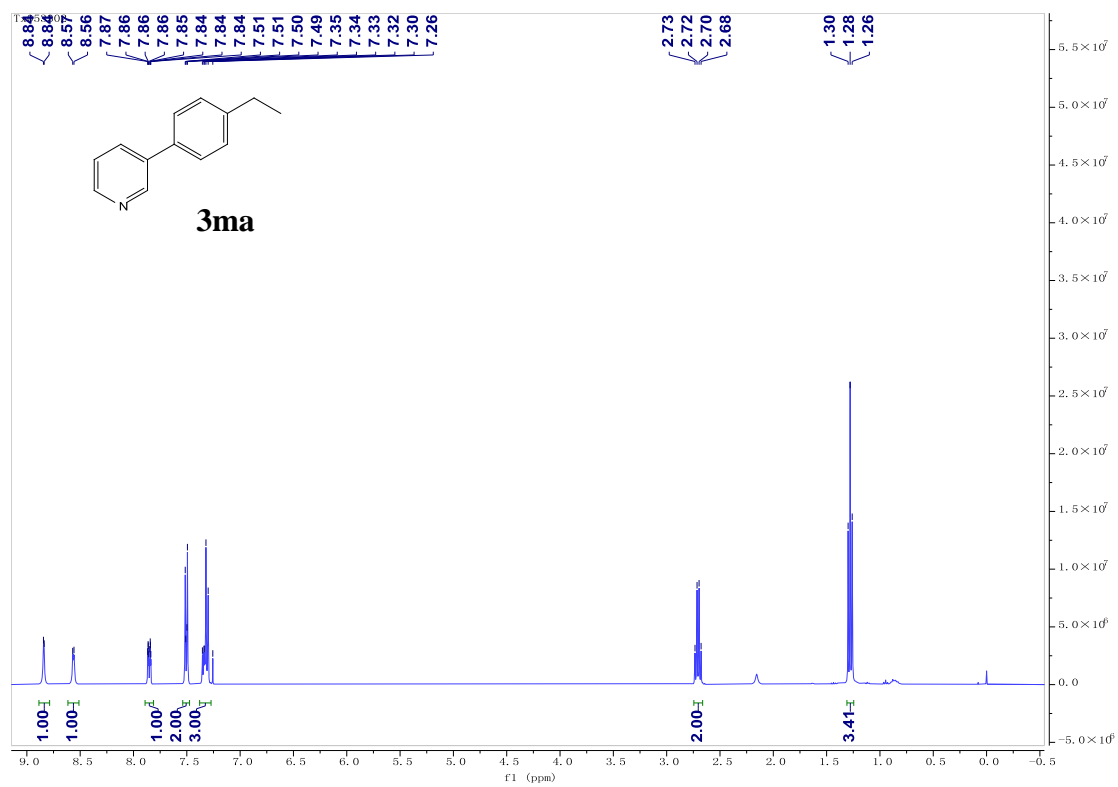

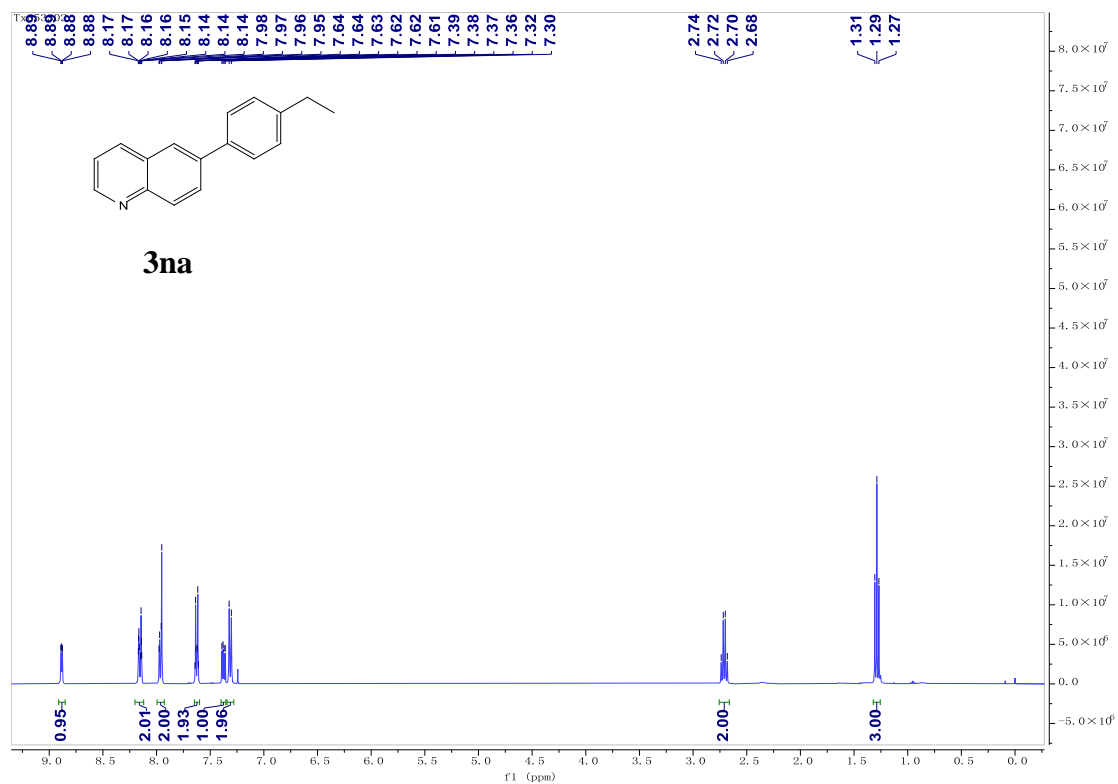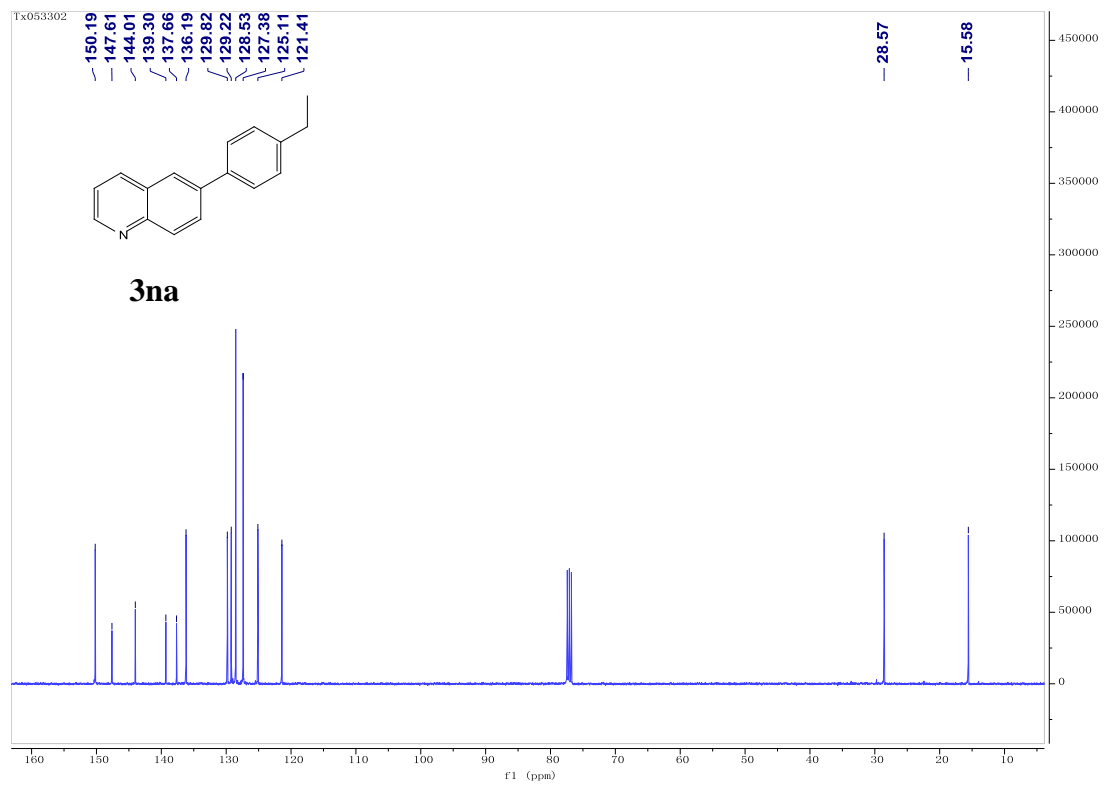

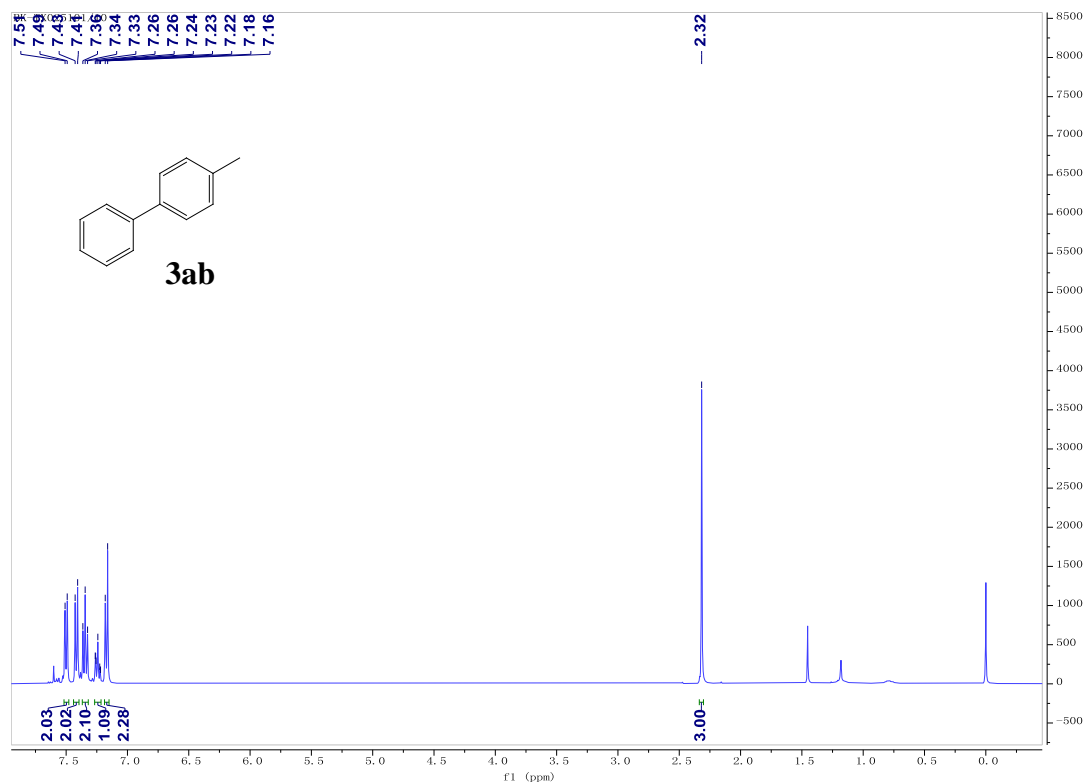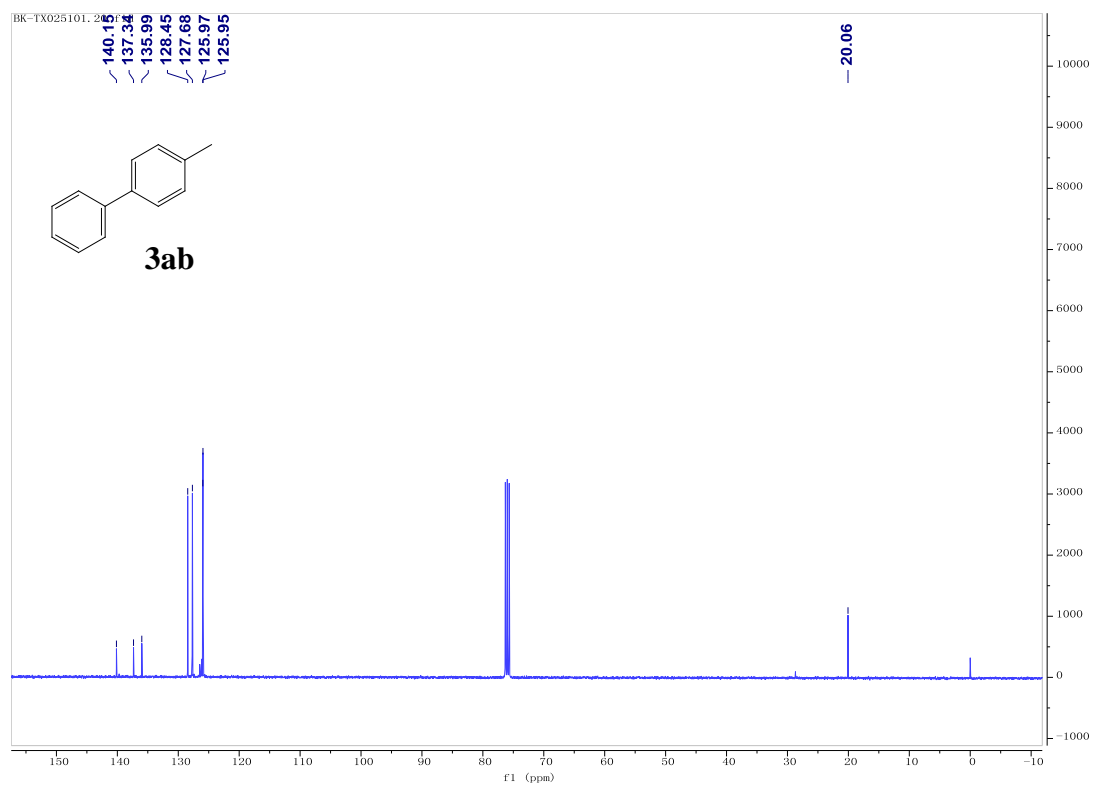

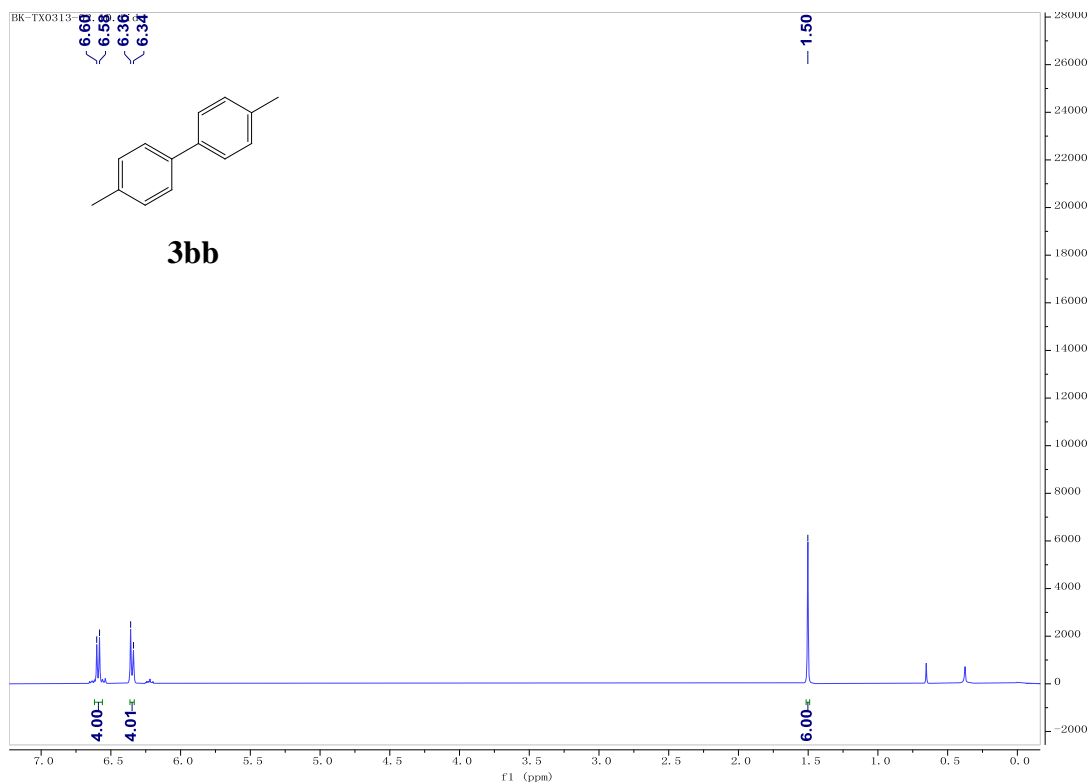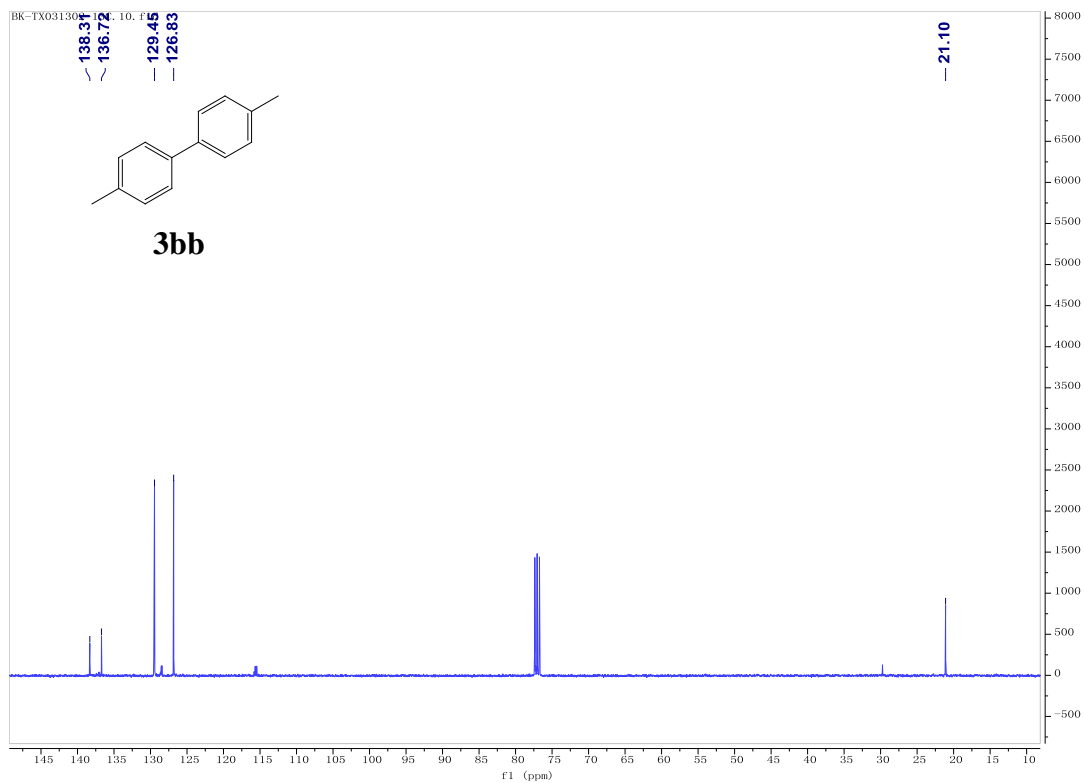



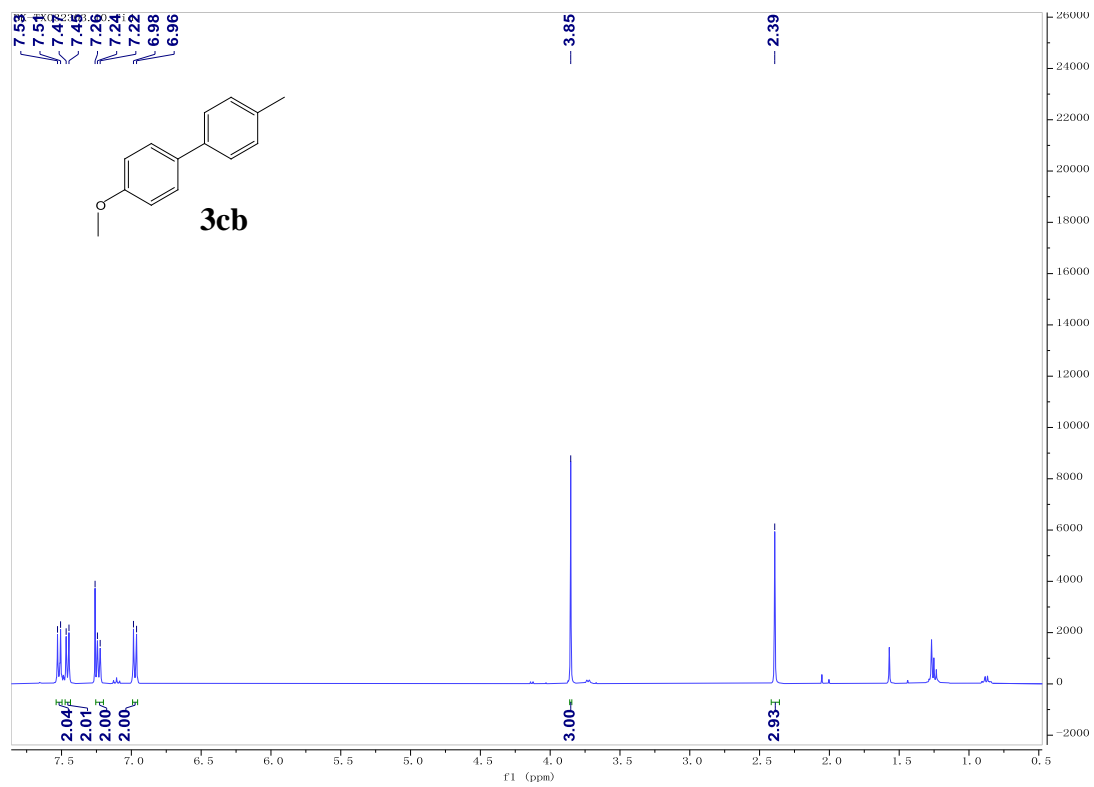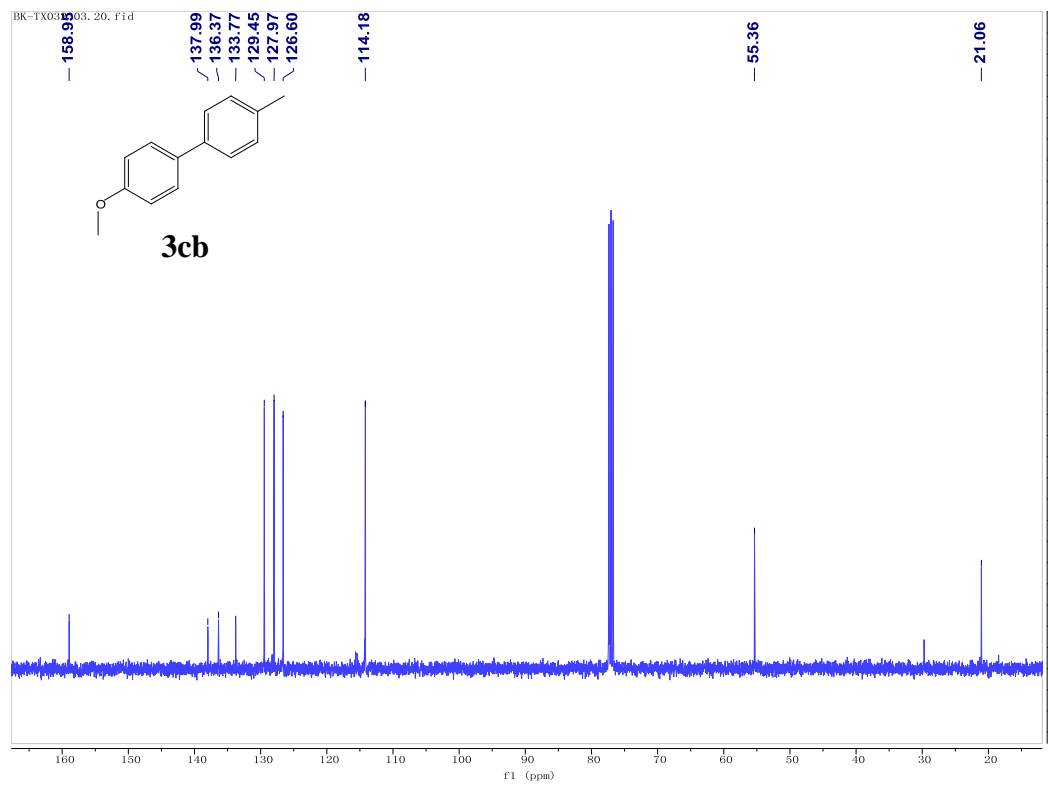

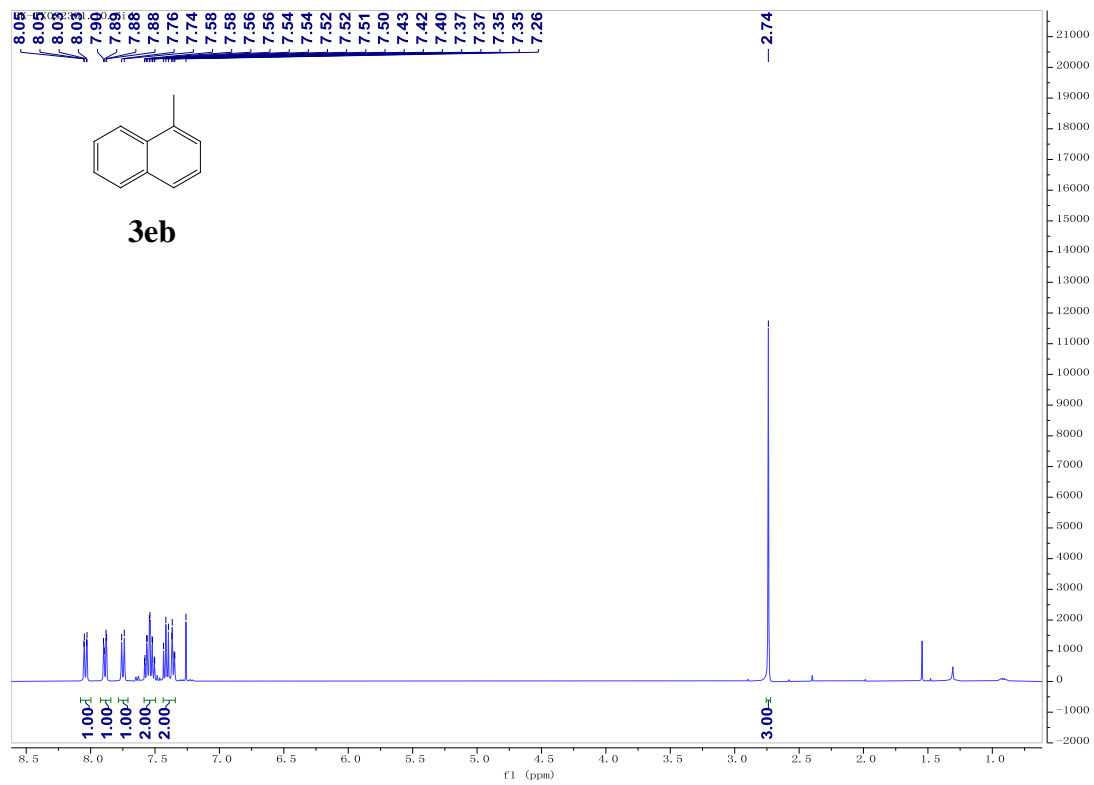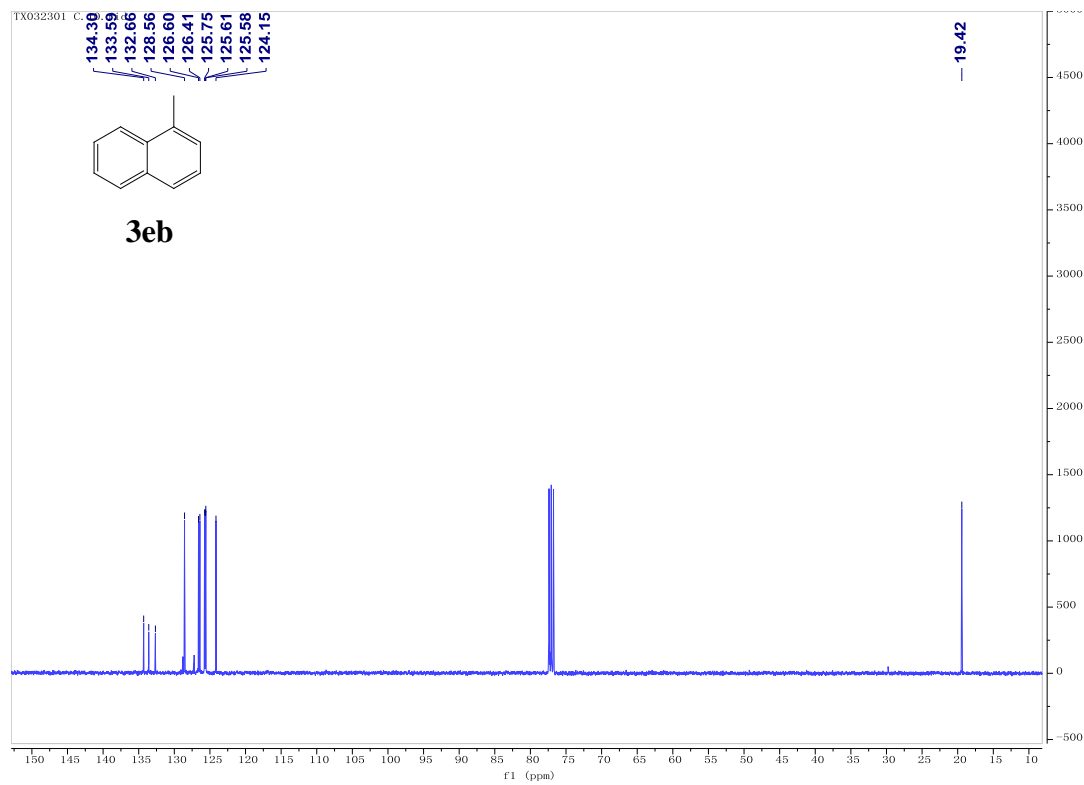

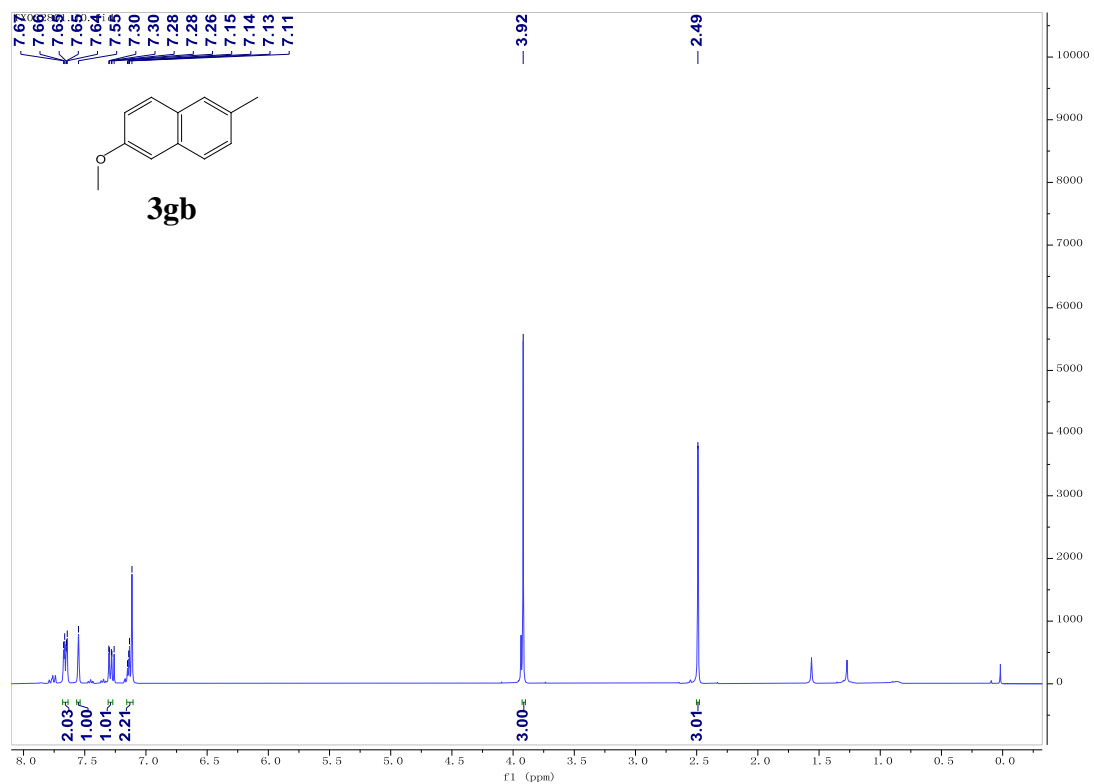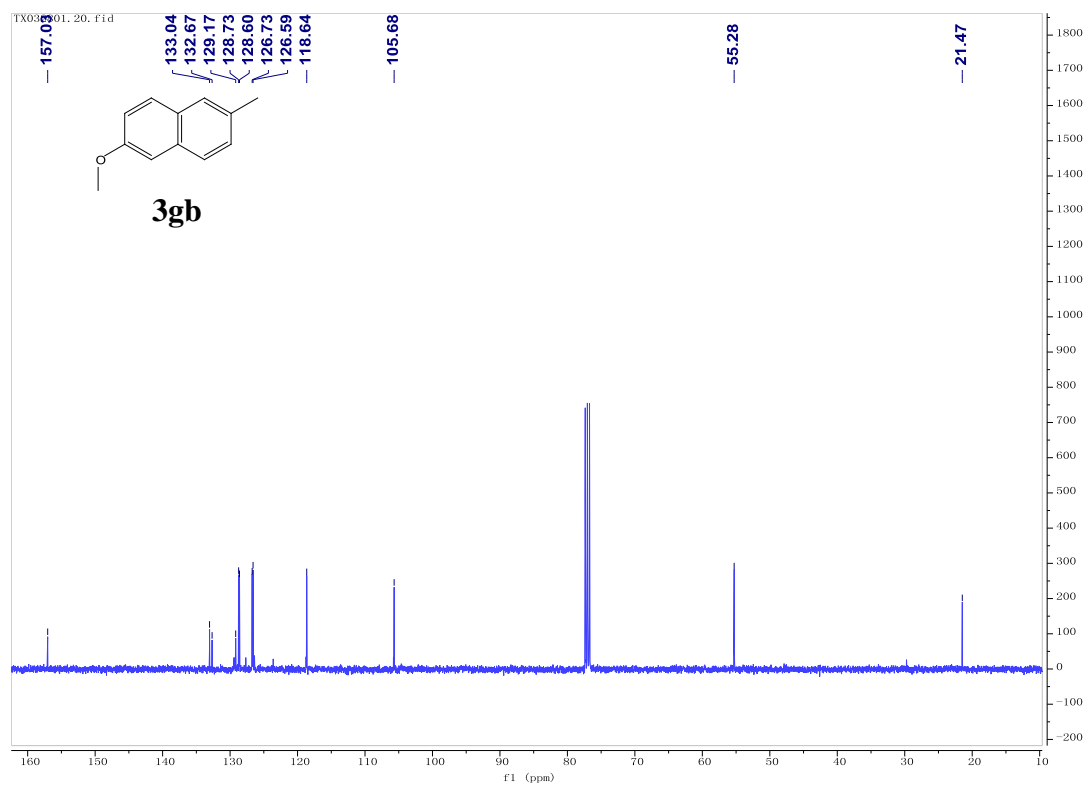

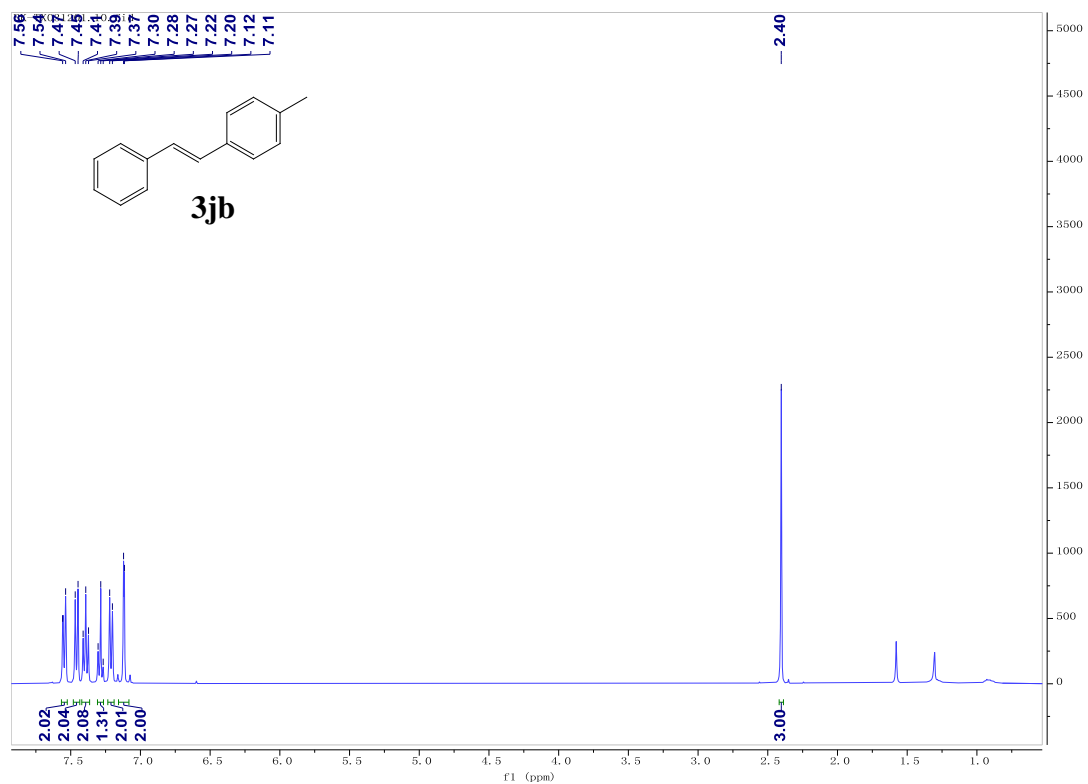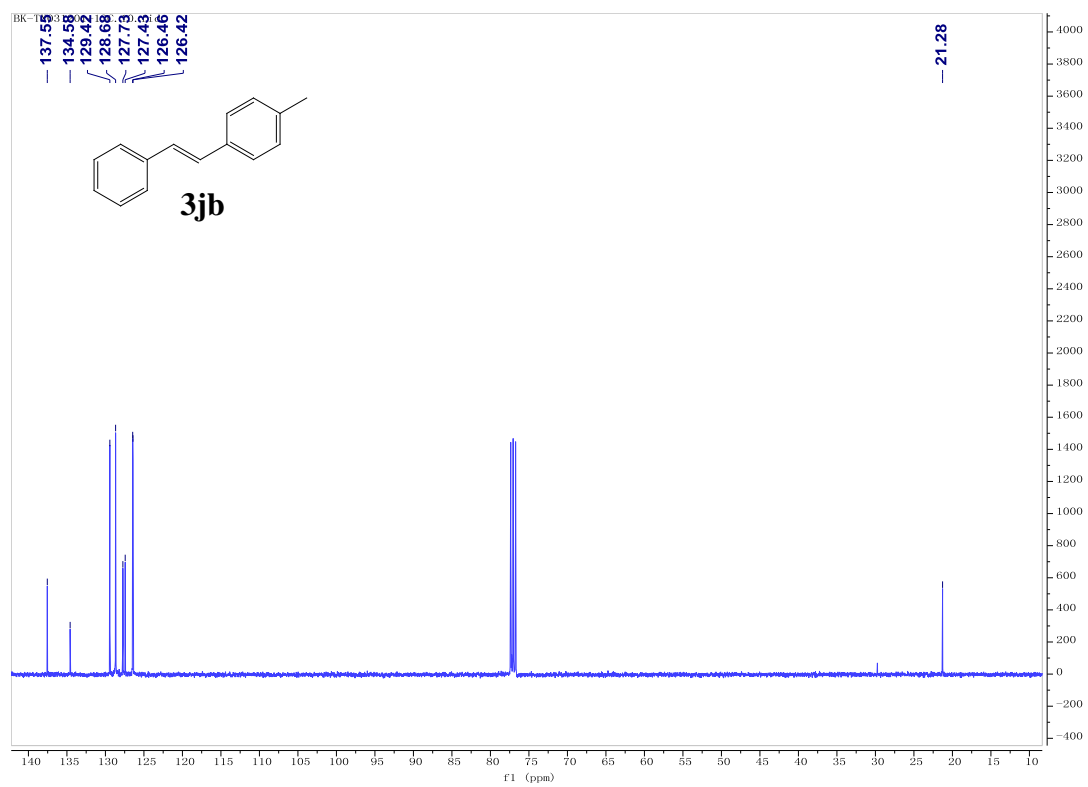

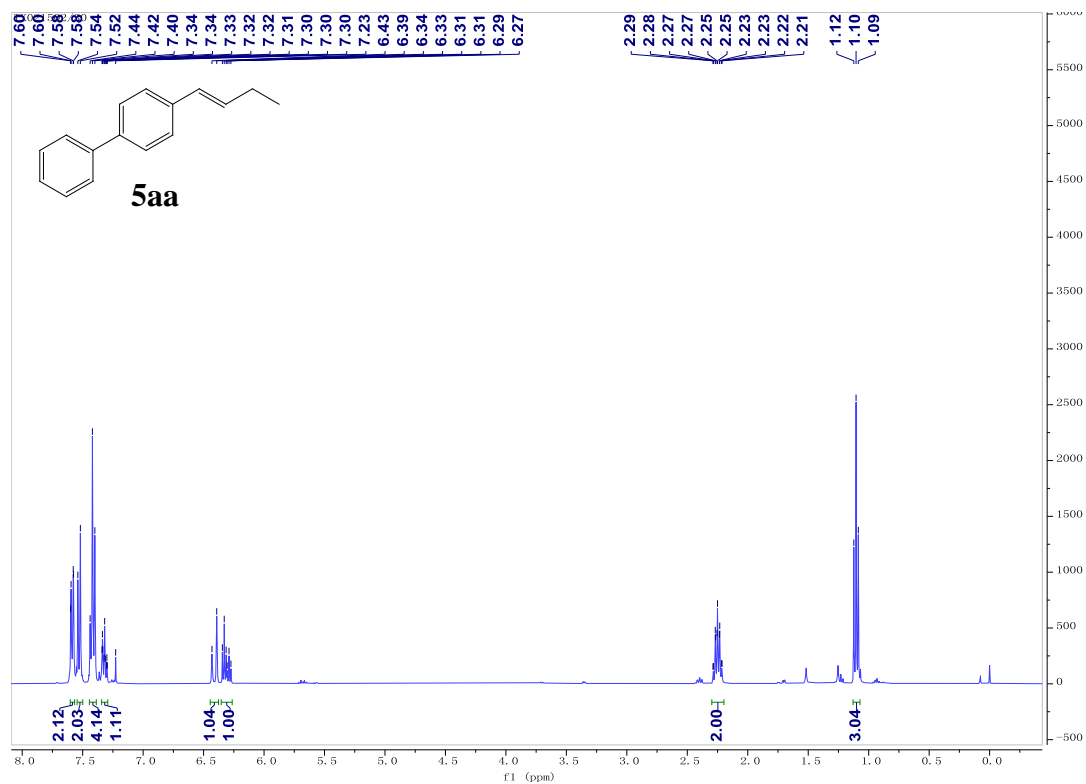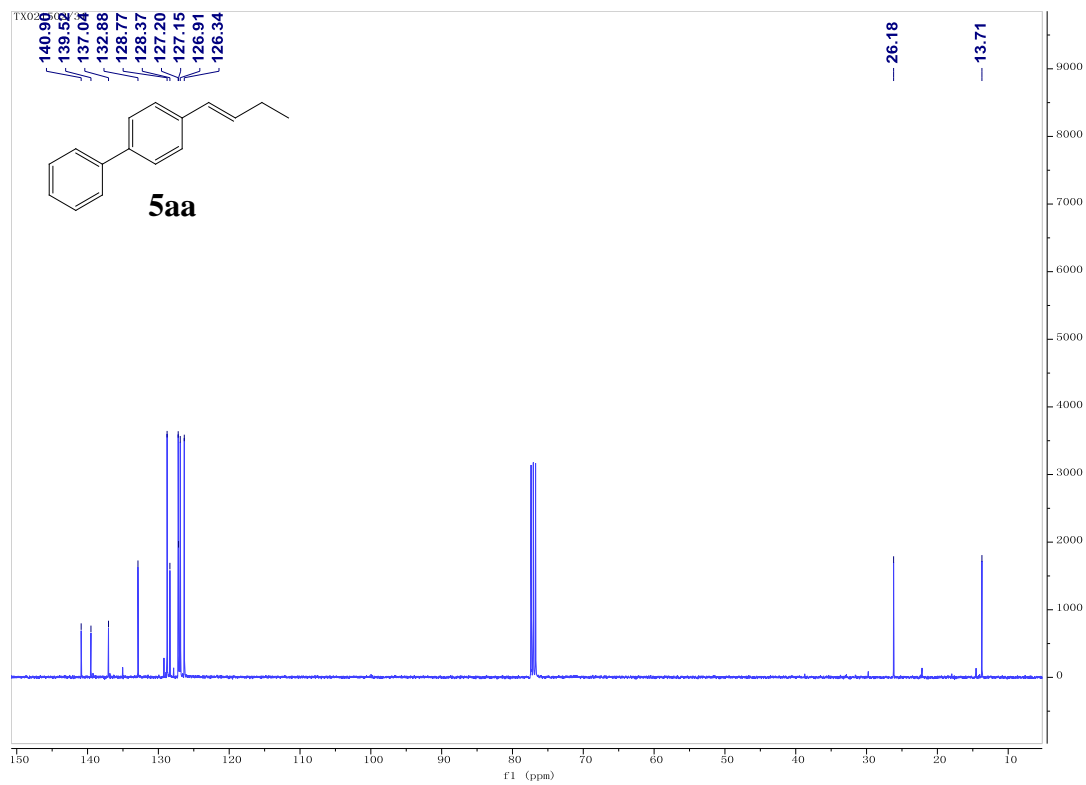

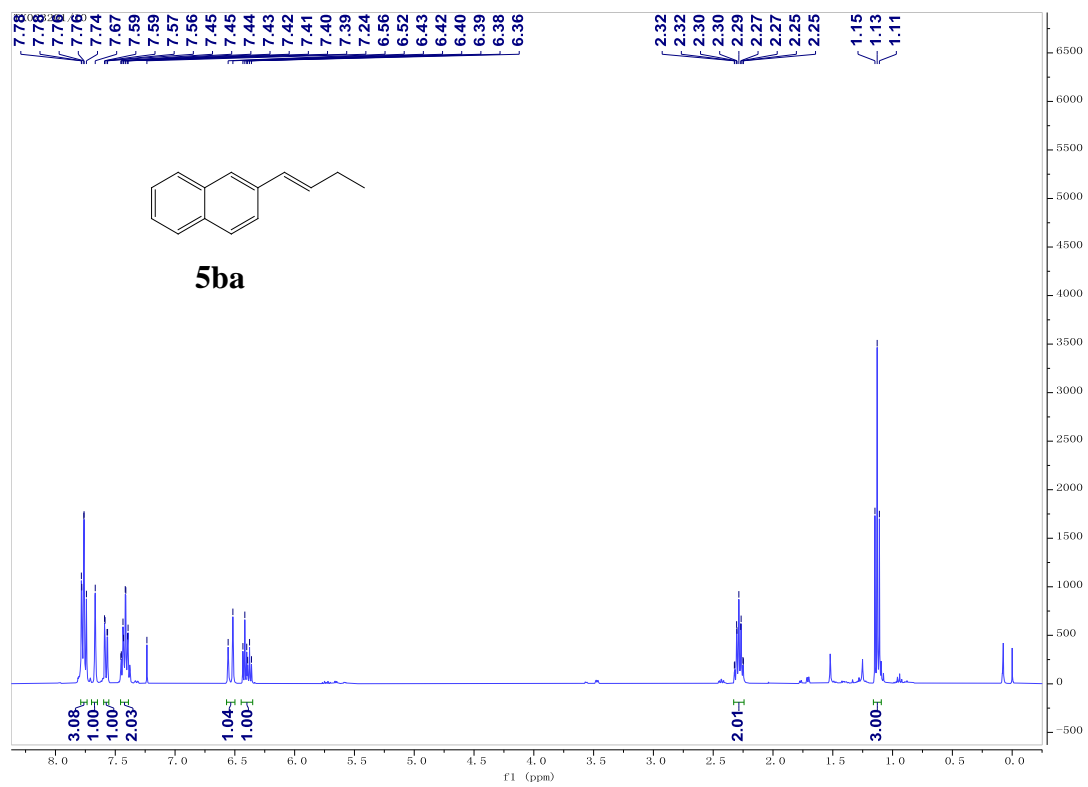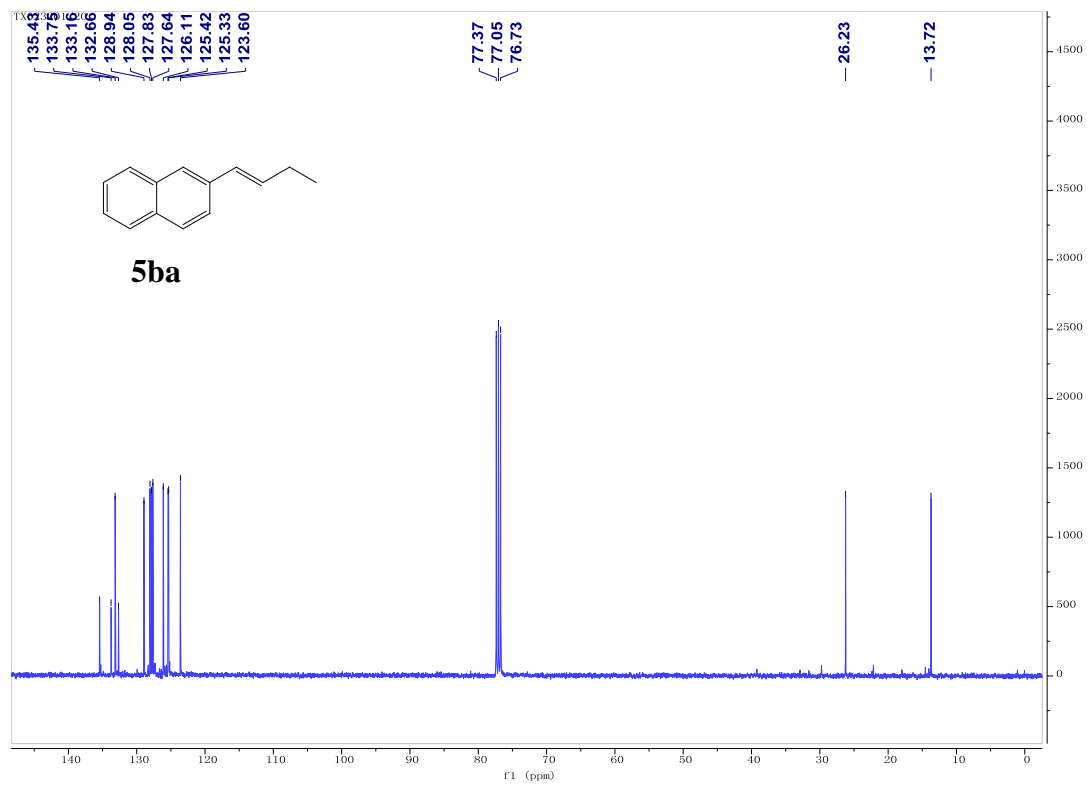

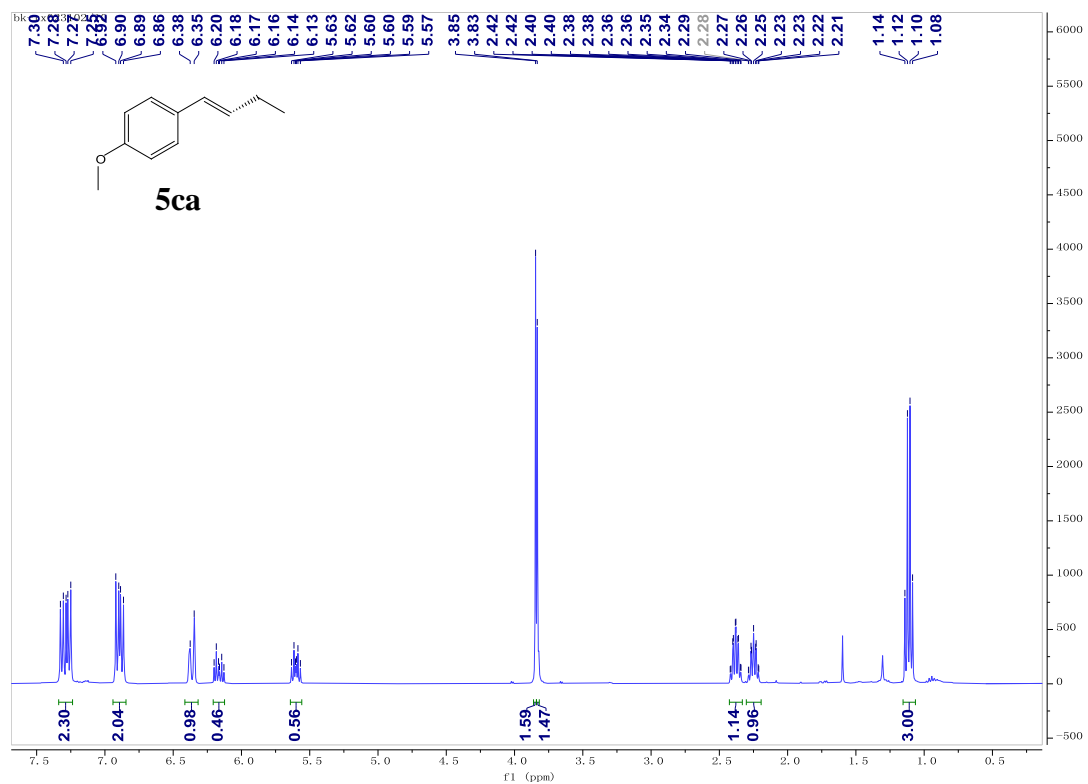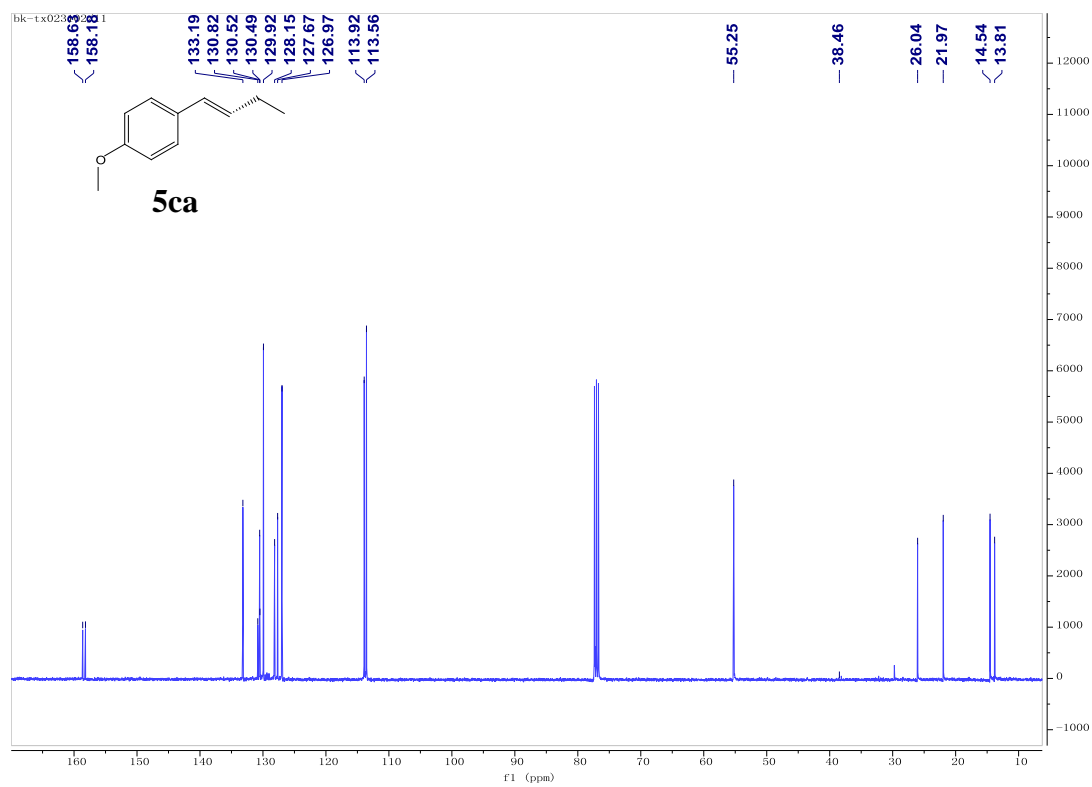

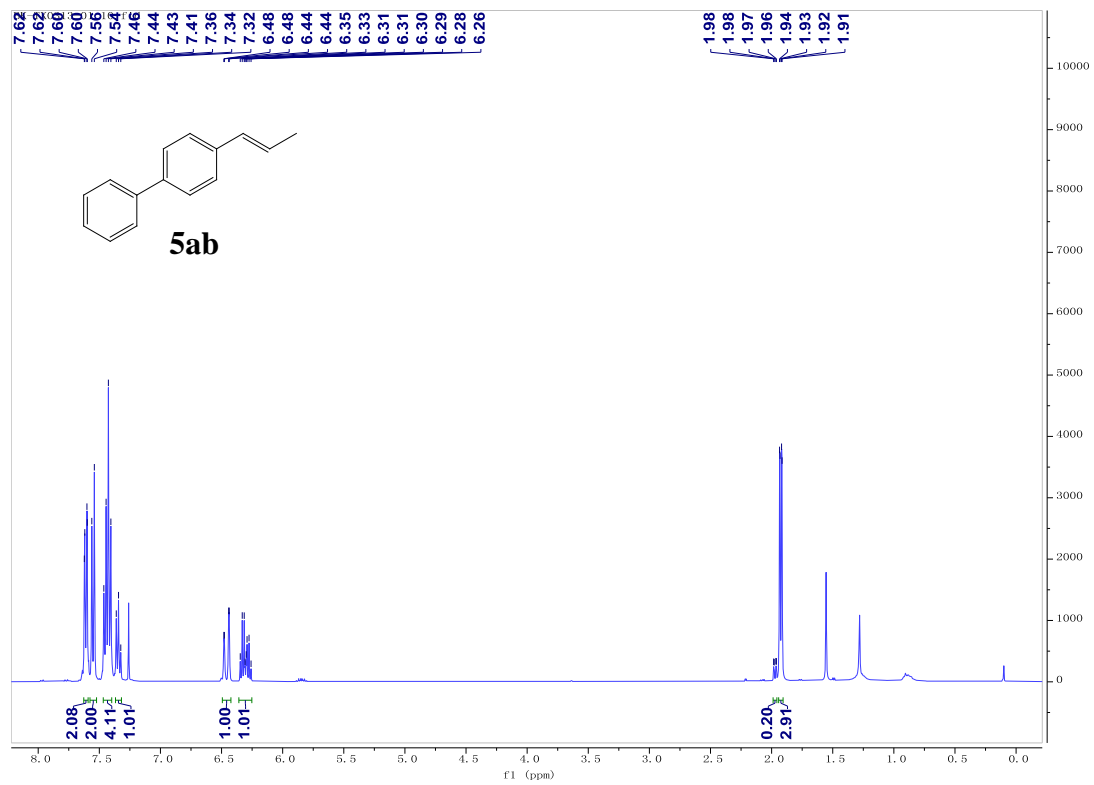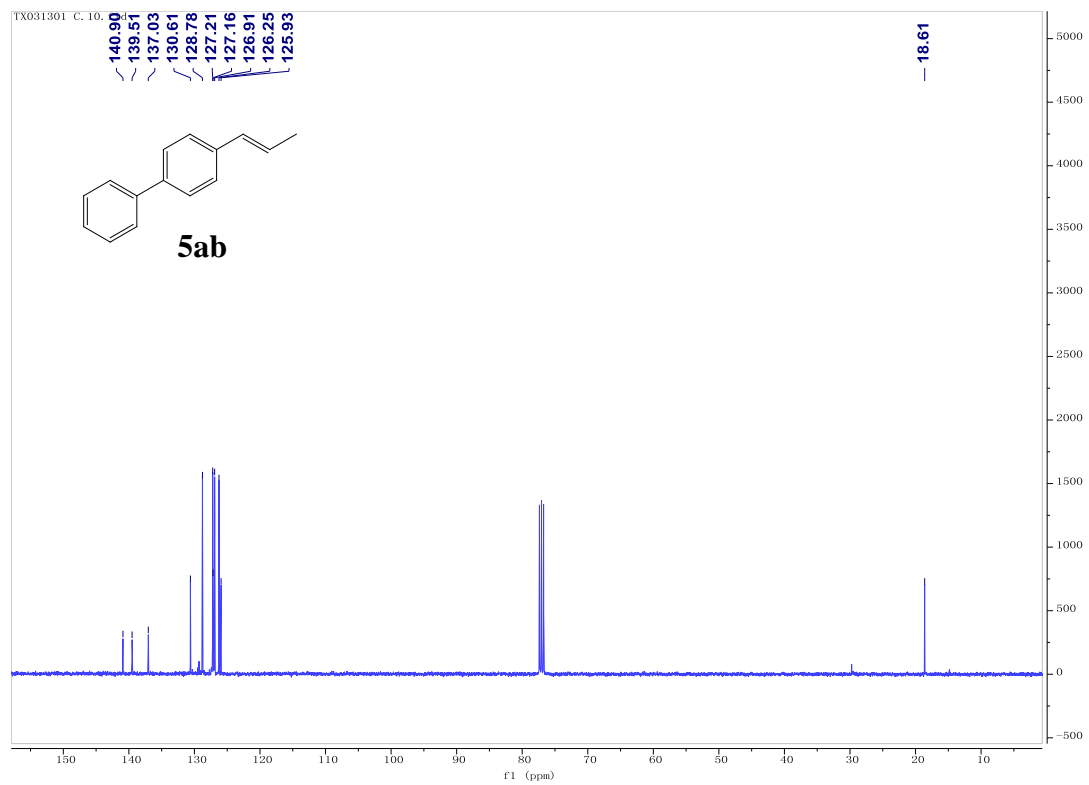



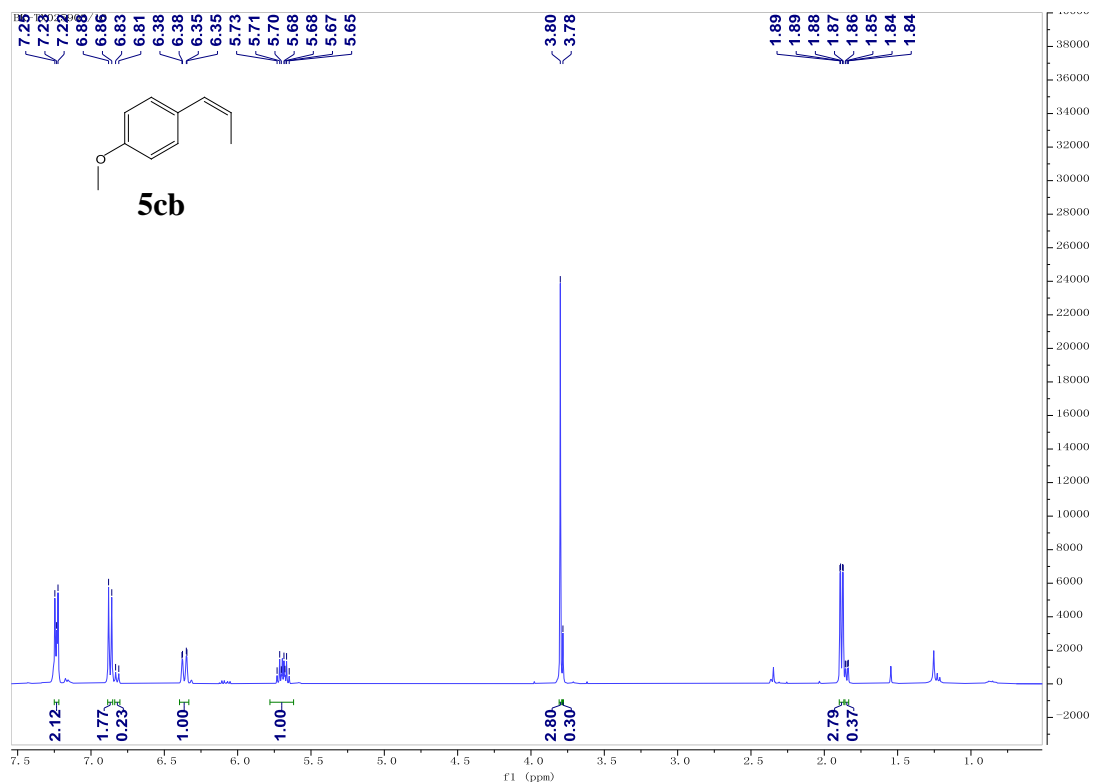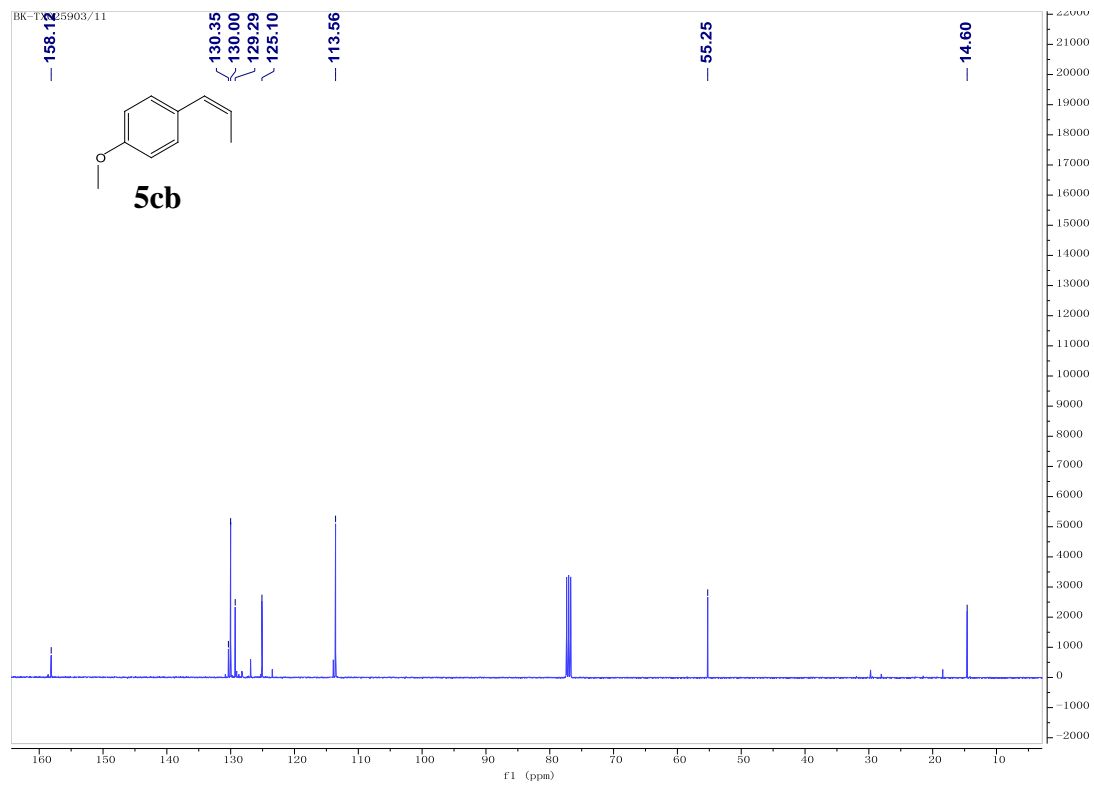

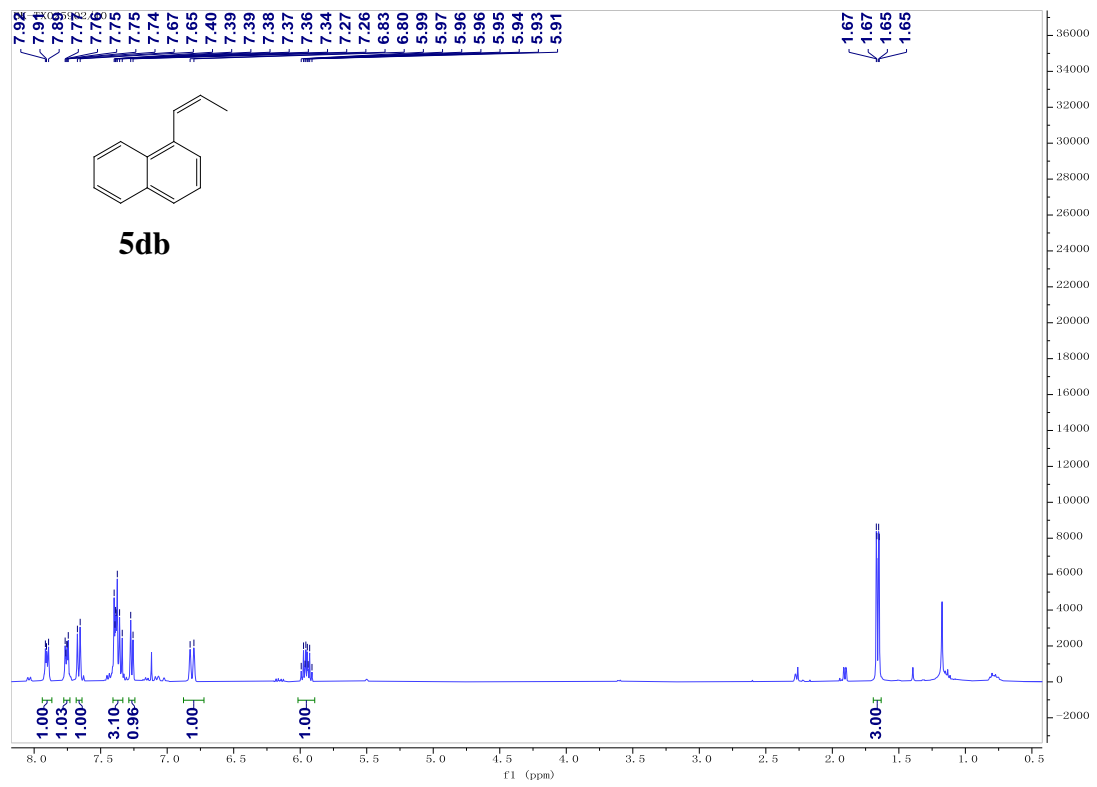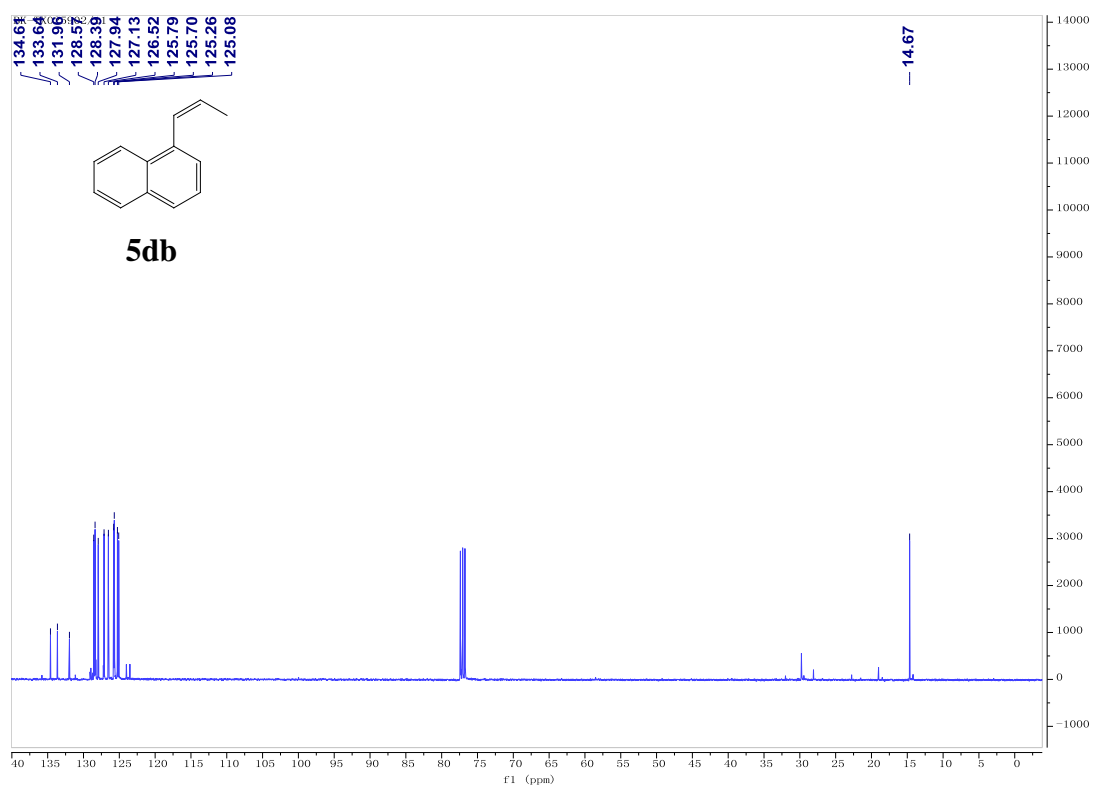

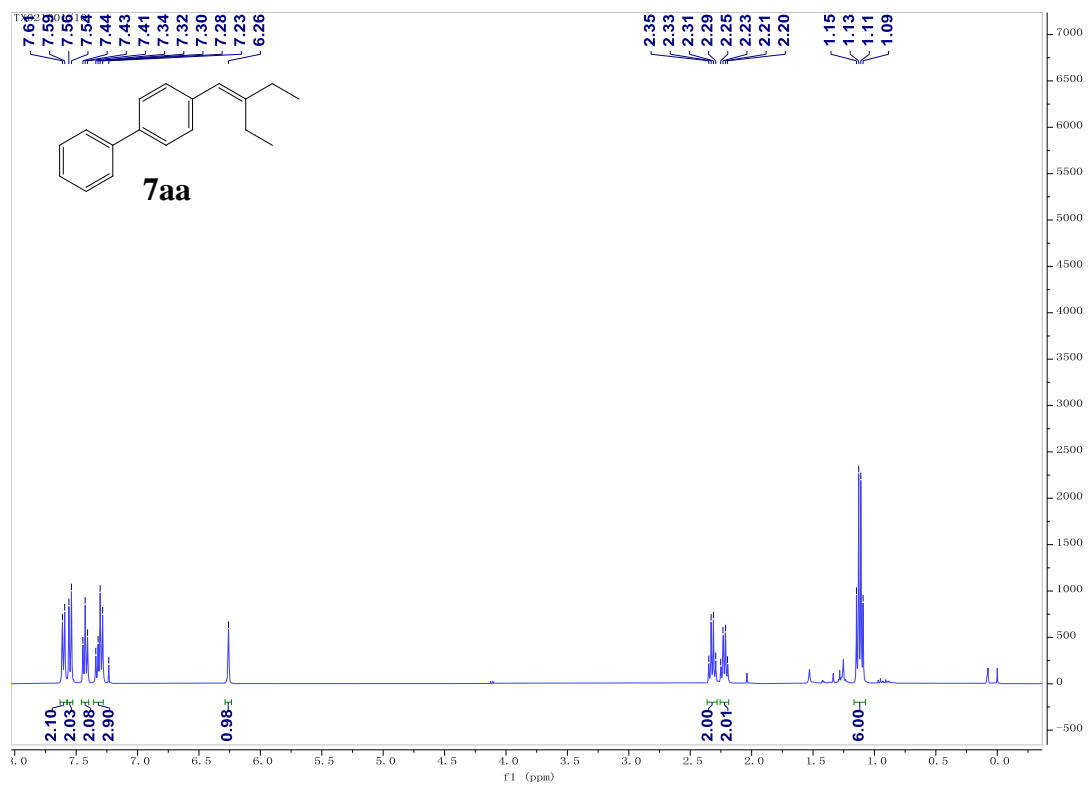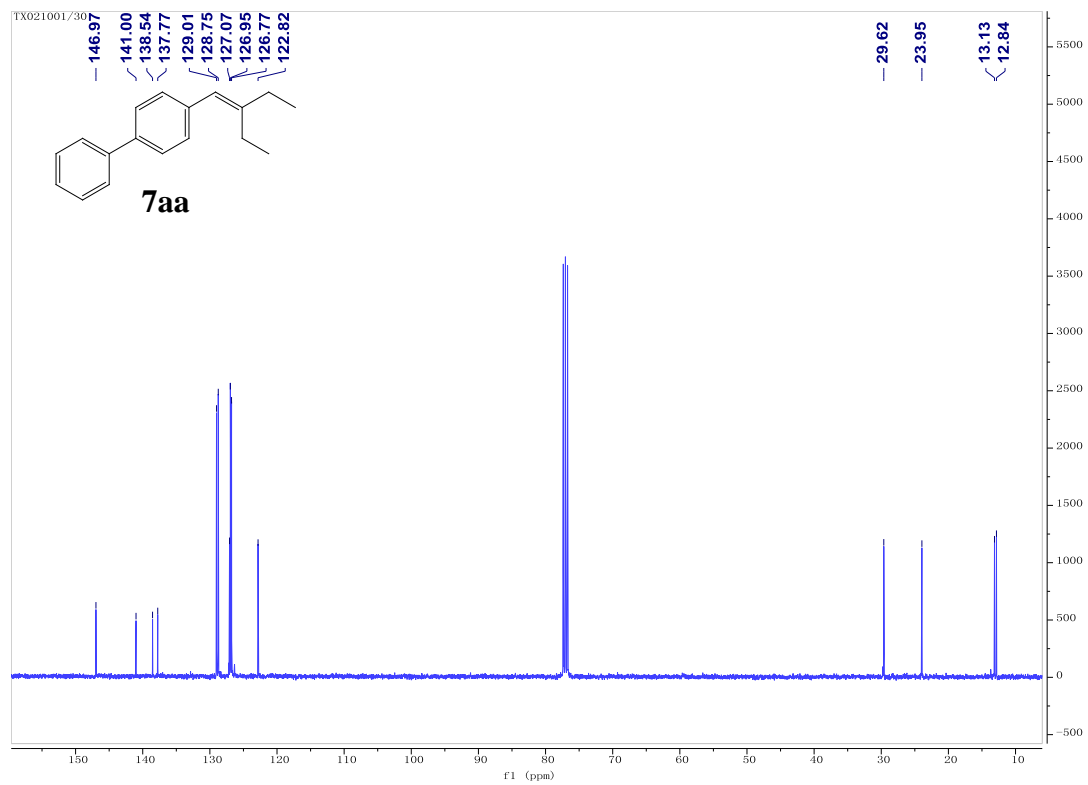

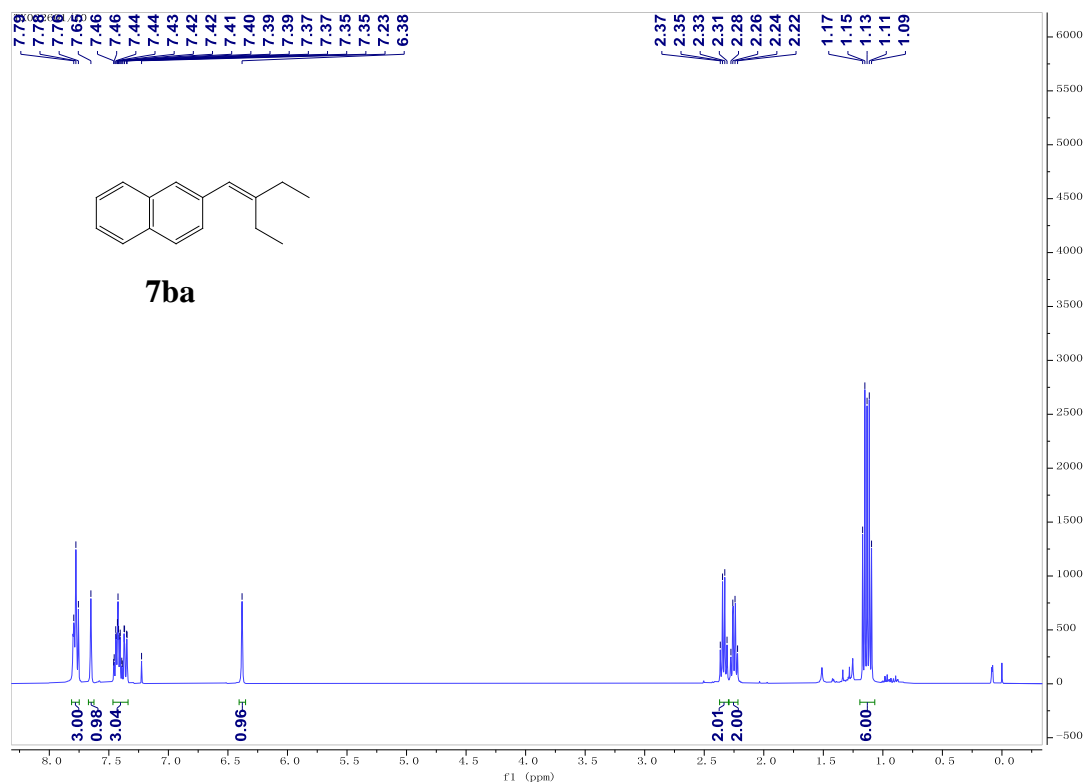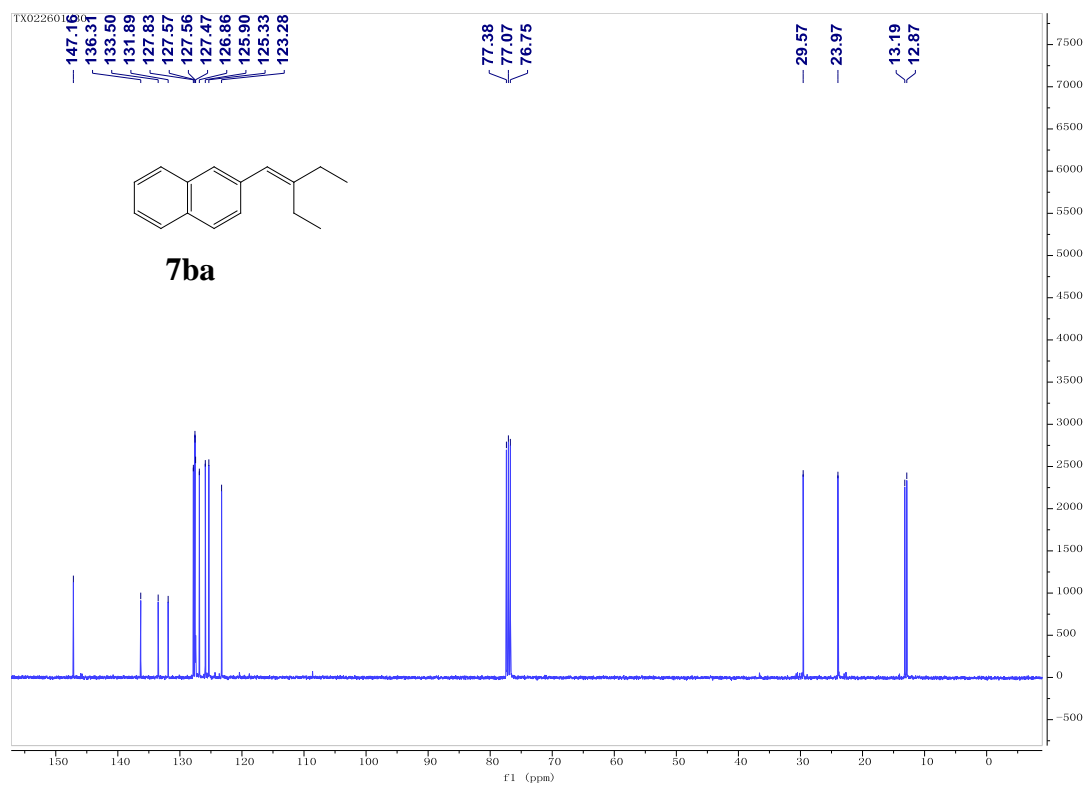

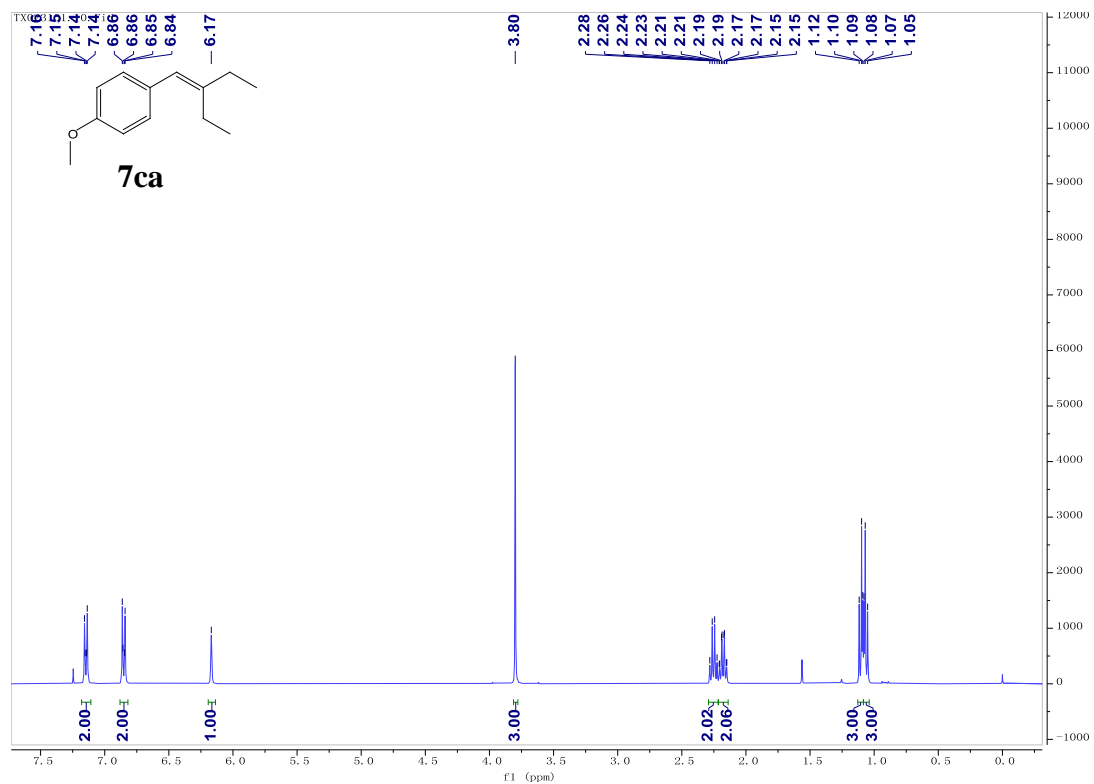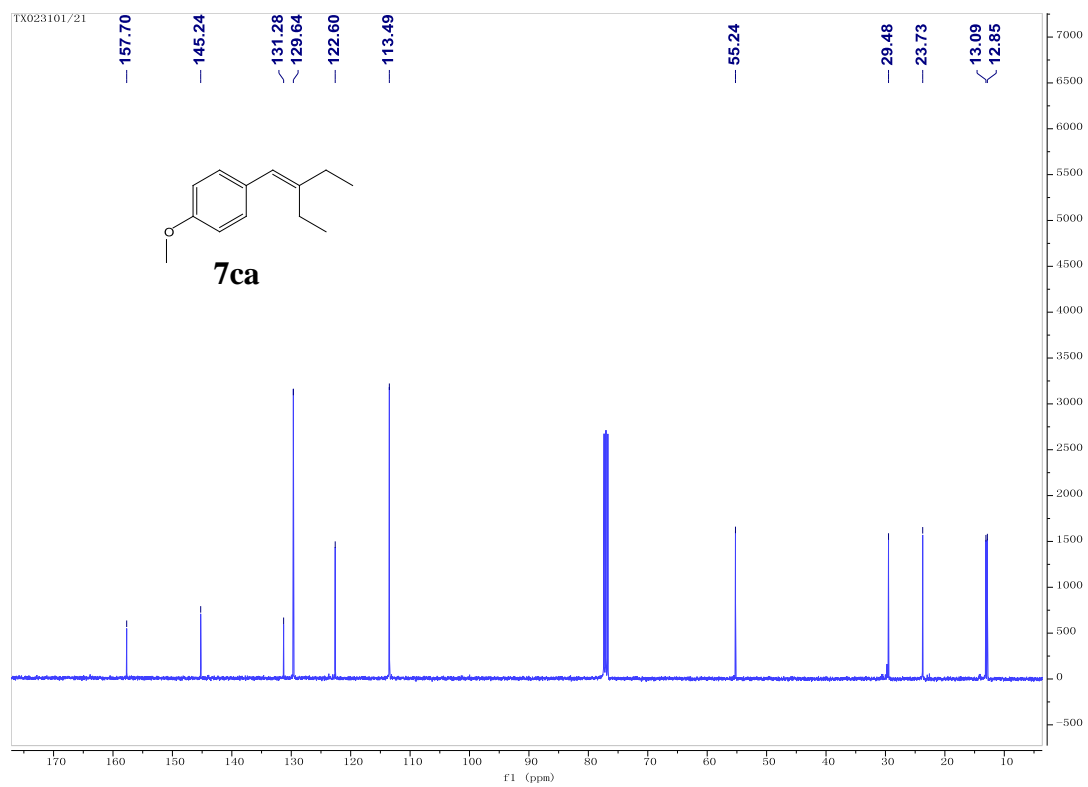

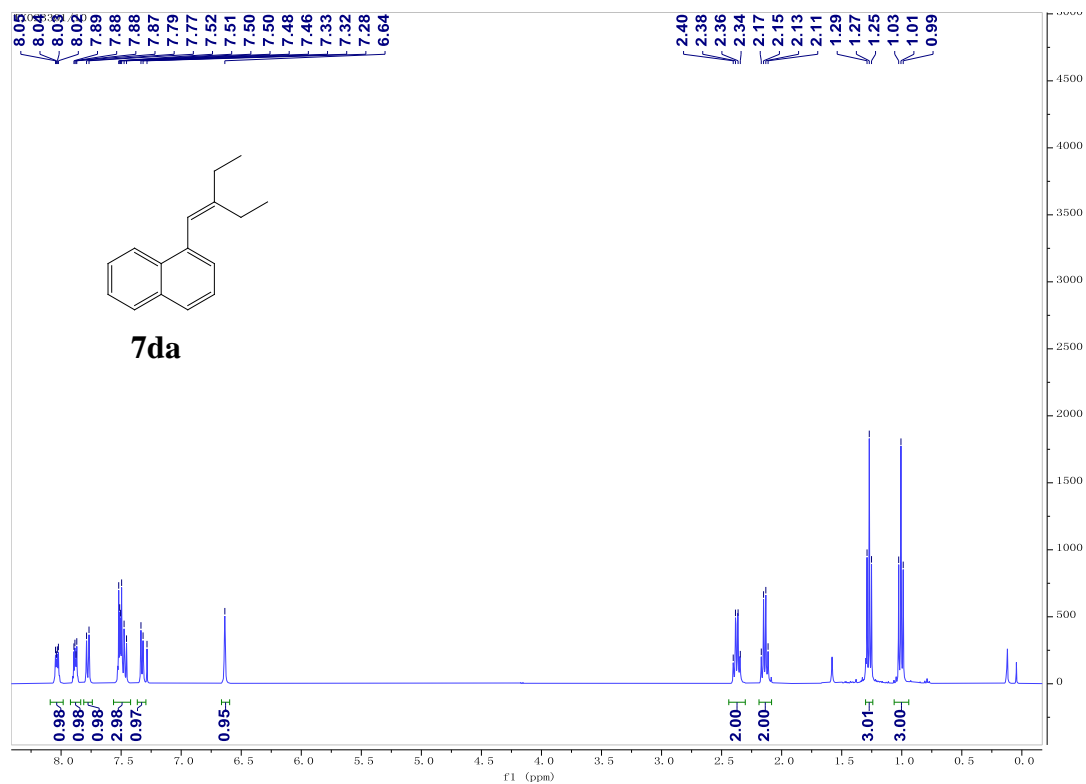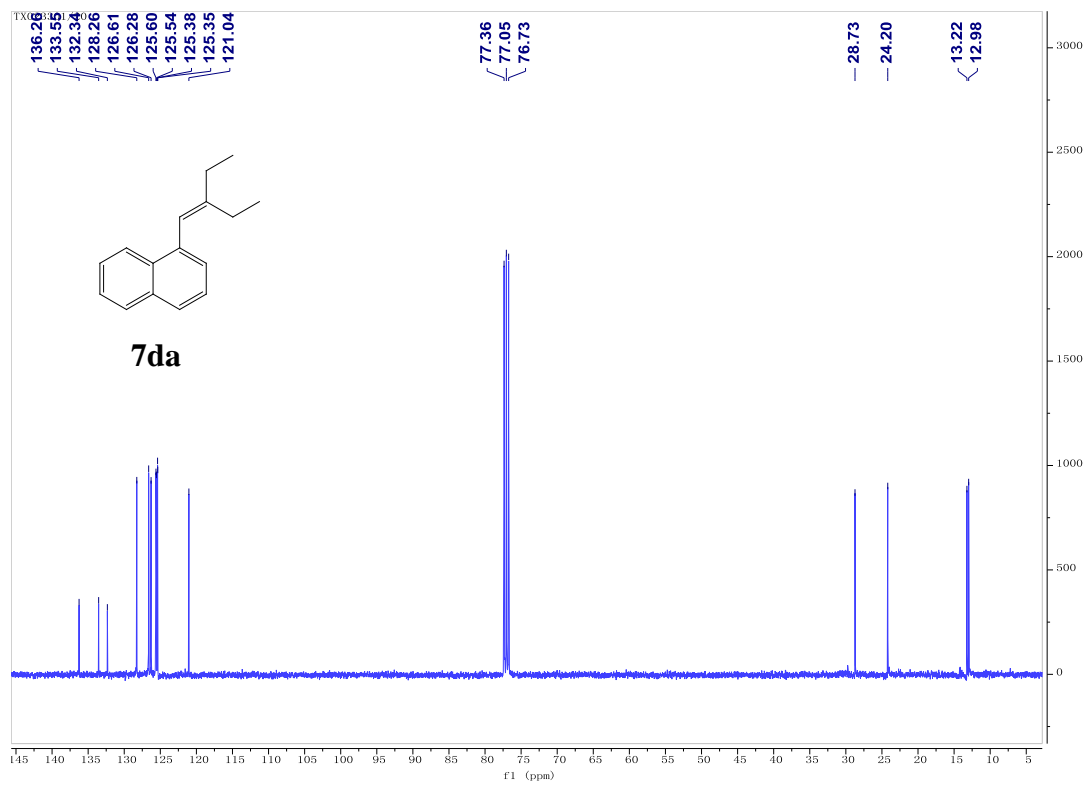

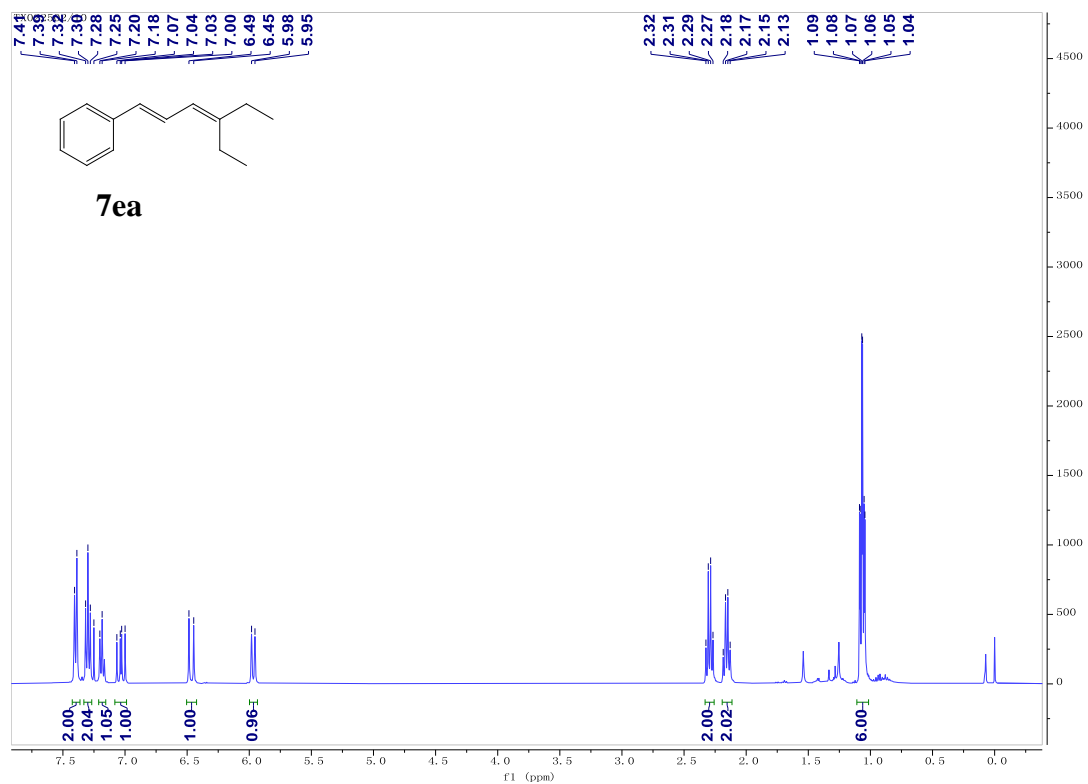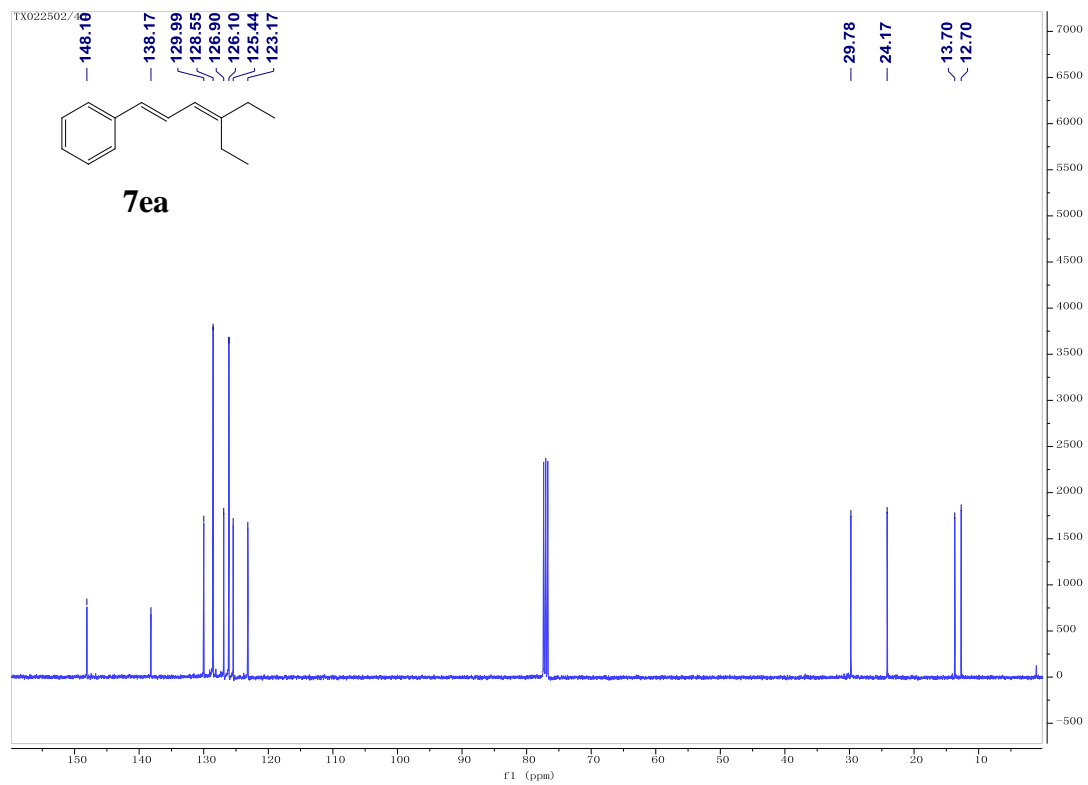

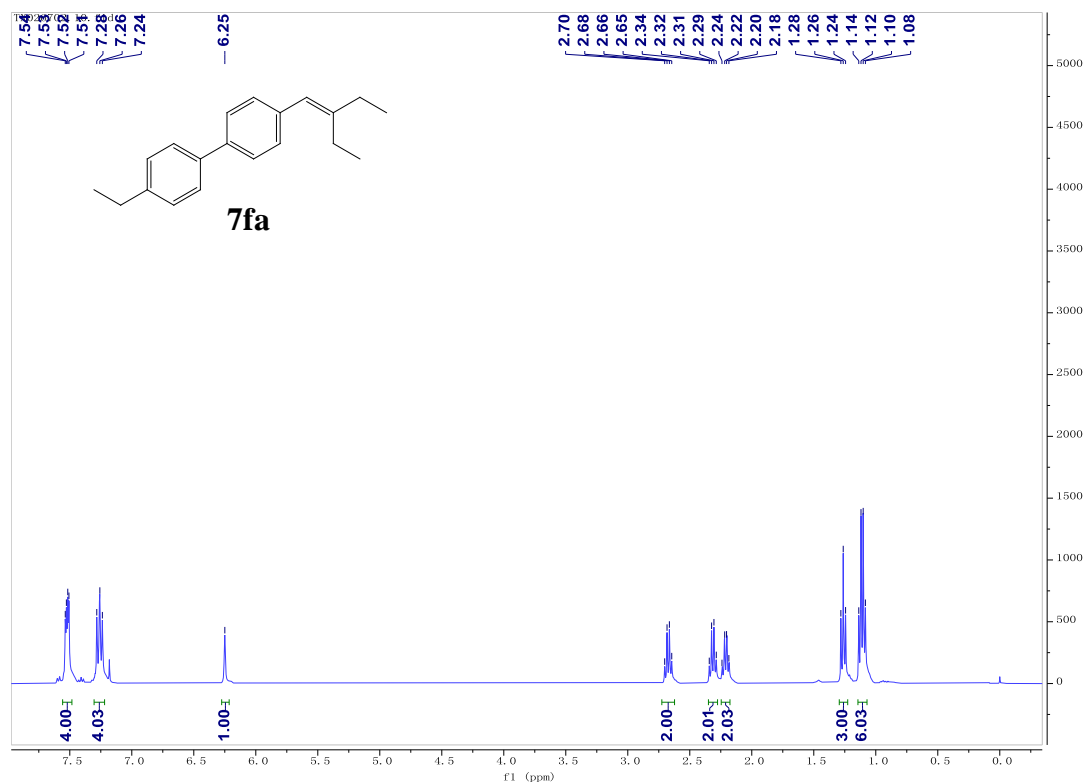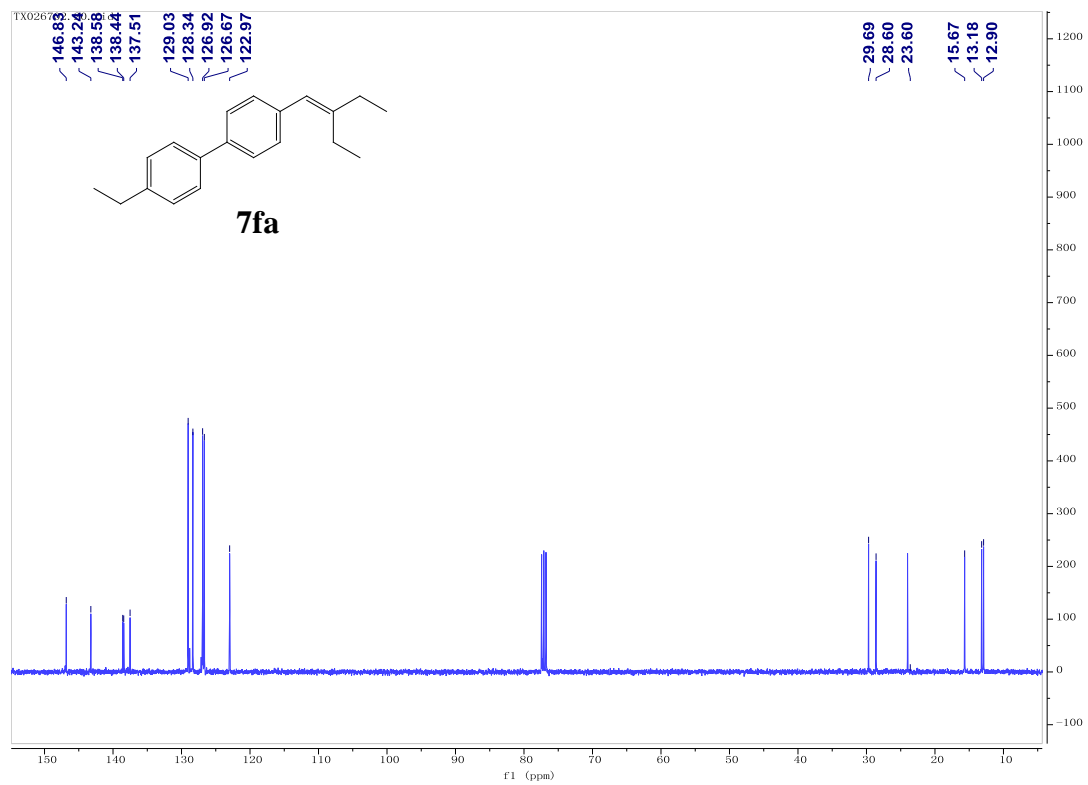



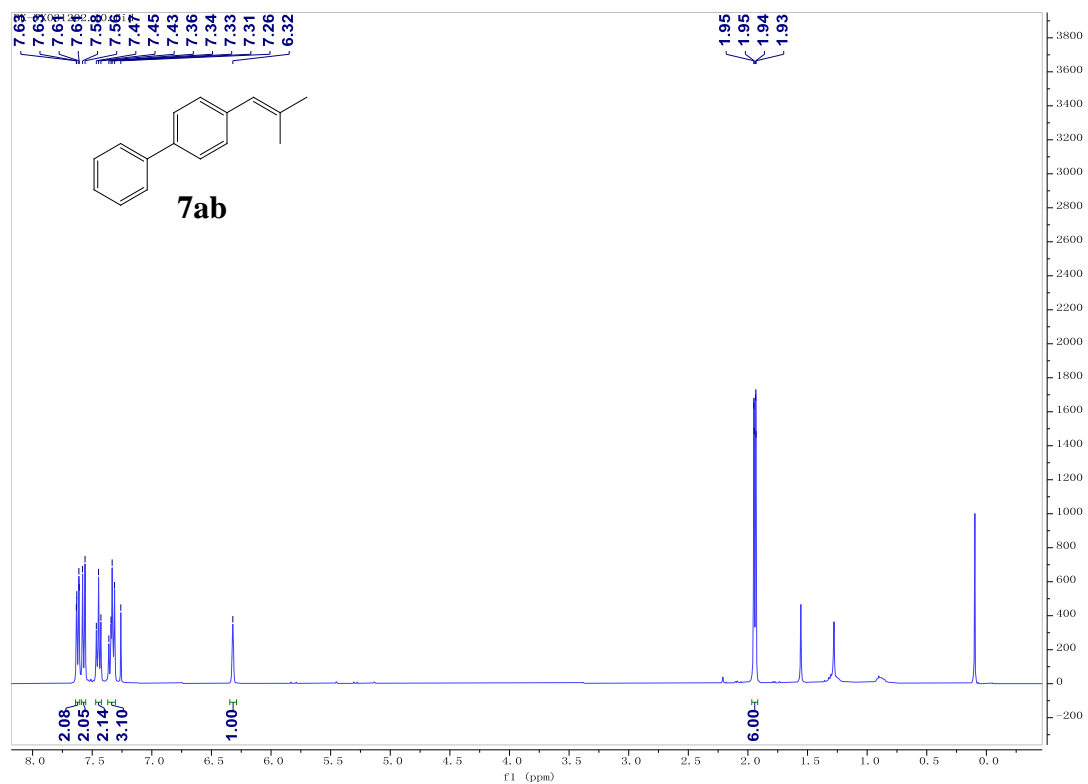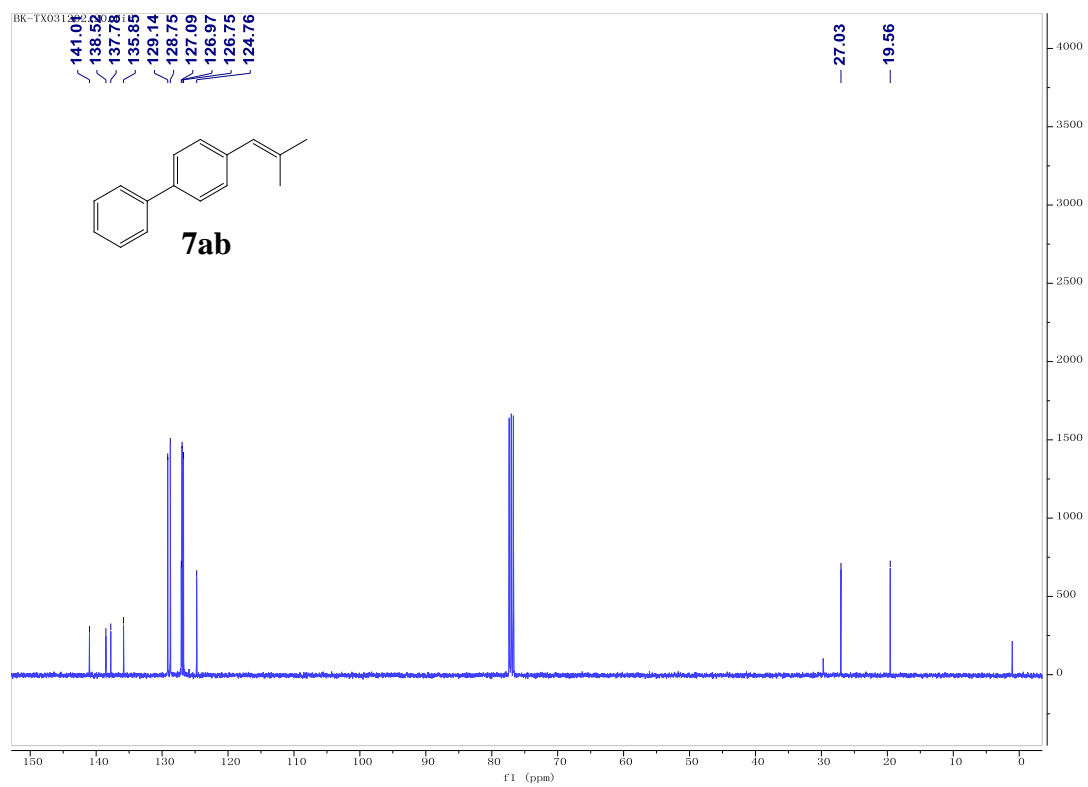

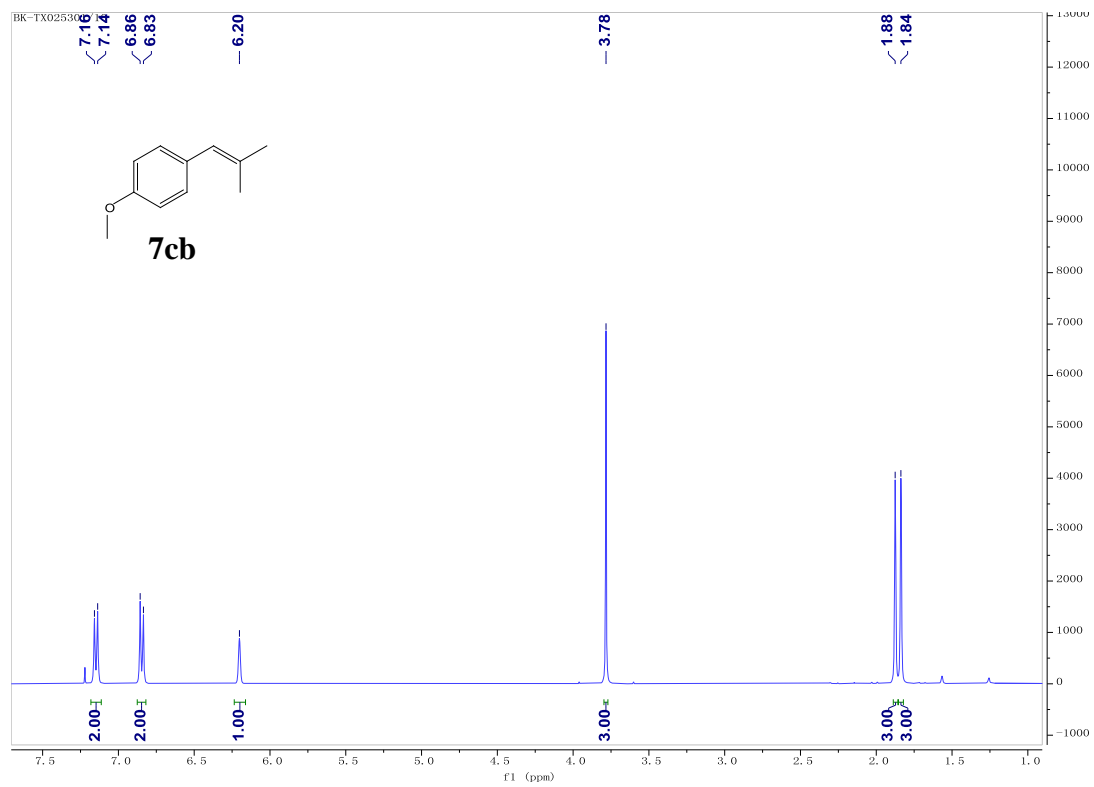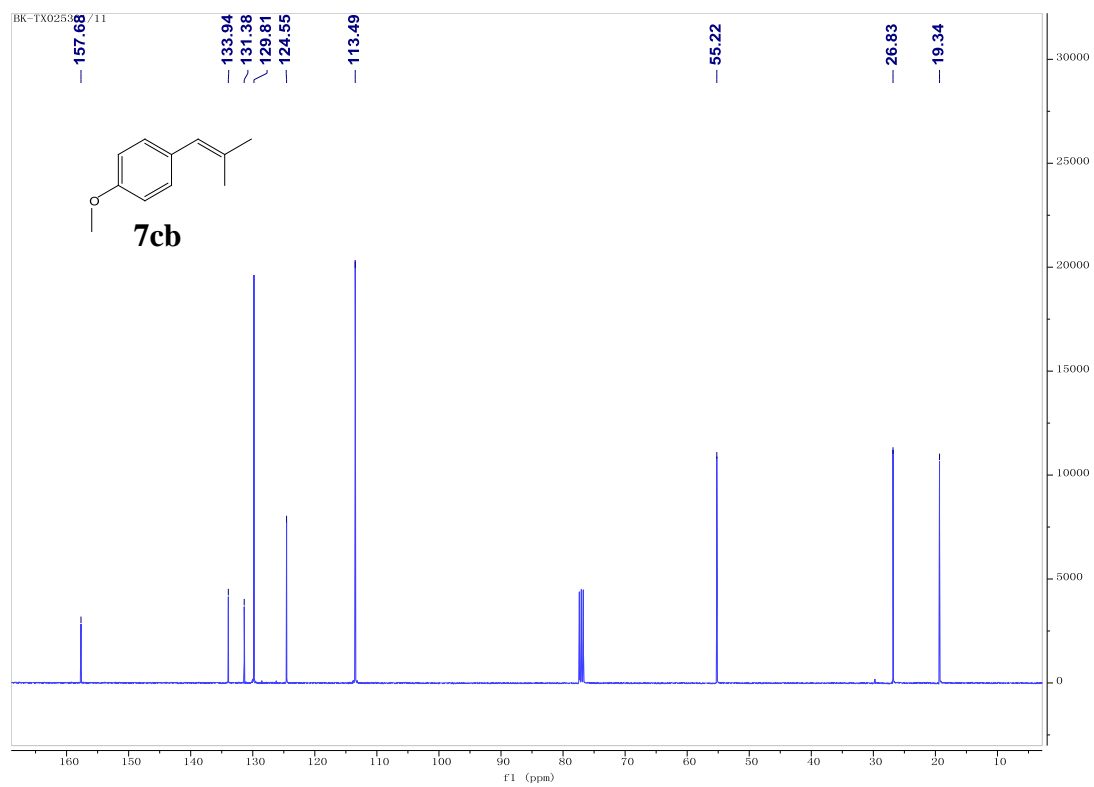

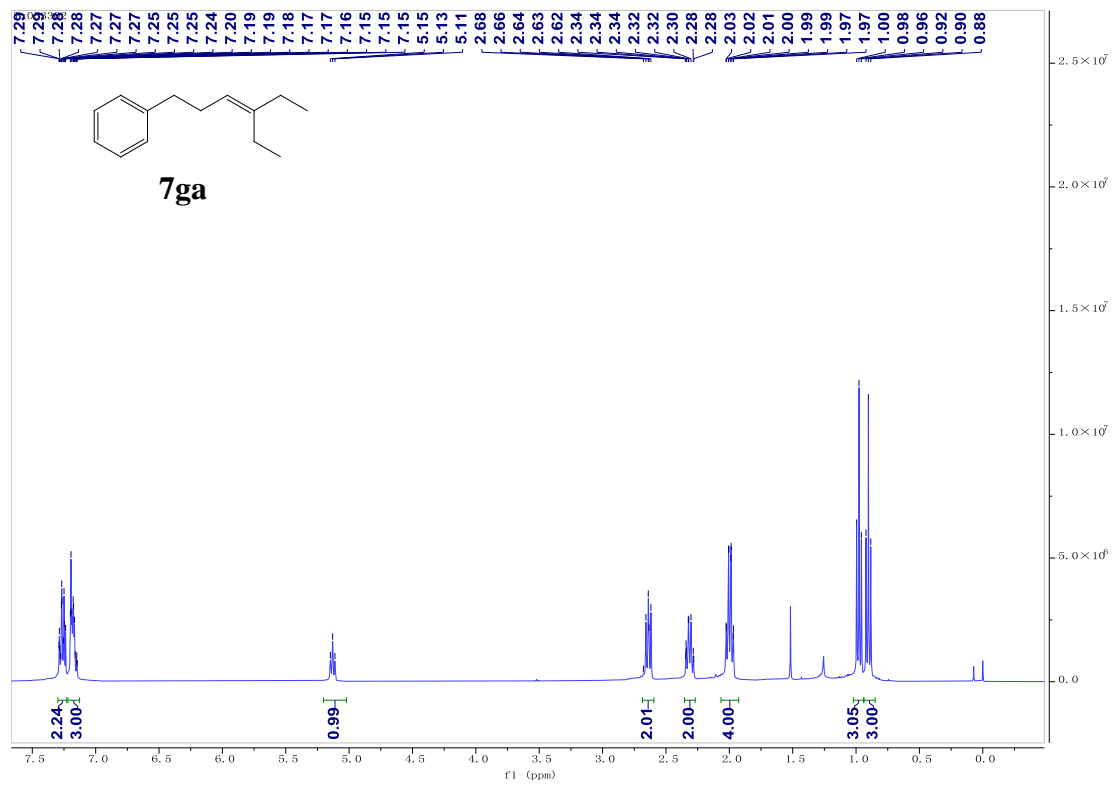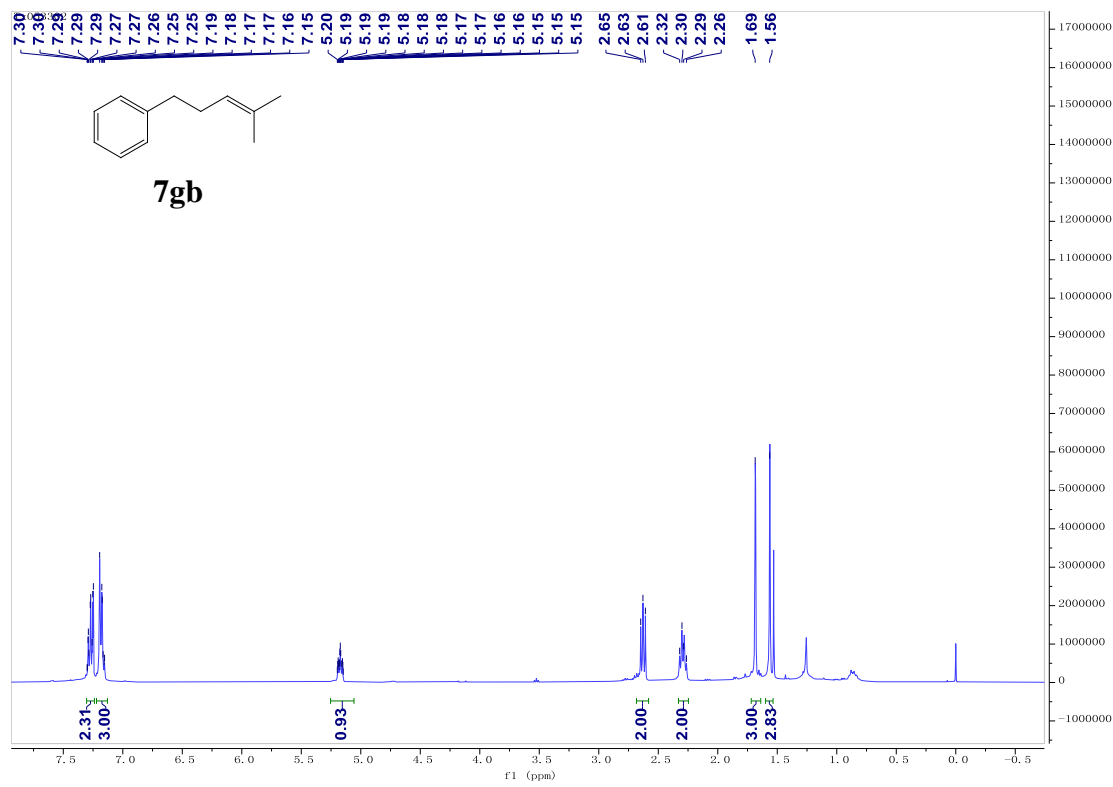

Supplement: d1qo00549a1.pdf [file d1qo00549a1.pdf]
